# Supplementary material for: Exploring the pathogenesis of colorectal carcinoma complicated with hepatocellular carcinoma via microarray data analysis
Source: Front Pharmacol. 2023 Jun 13;14:1201401. doi: 10.3389/fphar.2023.1201401 (PMC10293624; doi:10.3389/fphar.2023.1201401)
Supplement: Supplementary file 1 [file Table2.XLS]

id	logFC	AveExpr	t	P.Value	adj.P.Val	B
FOXQ1	7.08389710139974	6.21290792321777	40.4995967603202	2.47371221336767e-75	2.85144806834892e-71	161.430574306035
SPIB	-5.04509941723633	9.65374838006592	-39.8223411973263	1.8652347266883e-74	1.0750280347268e-70	159.434606264262
FABP6	5.46982552237955	5.01671680474854	38.5361921572298	9.38433624814044e-73	3.60577479774383e-69	155.560290160241
GRIN2D	5.89927430664063	4.12122805908203	36.1933446969831	1.57915211852915e-69	4.55072161757137e-66	148.204676797185
CA7	-6.44416660319011	9.31775665283203	-35.1663425830469	4.64705592017555e-68	1.07133227183727e-64	144.85150975104
ASCL2	3.80786439119466	10.9991957820435	34.9265731257742	1.03539196159465e-67	1.98916052355025e-64	144.056825114872
GTF2IRD1	2.95223491304524	7.92359292483521	34.6464375534743	2.65500311389051e-67	4.37203155625942e-64	143.122562266077
PUS7	2.40449599308268	8.45352879351807	34.2482958281902	1.02308727486213e-66	1.39522029473731e-63	141.783880170234
C2orf40	-5.67926212703451	6.68575598760986	-34.2298624444471	1.08935392145709e-66	1.39522029473731e-63	141.721589408119
DPEP1	7.27483647330729	4.62213327563477	33.6947431875716	6.8169528295257e-66	7.85790152659427e-63	139.901120490435
NFE2L3	2.84579160408529	8.68233525909424	32.6442341008465	2.67169760908082e-64	2.79969621271587e-61	136.2573955306
BEST4	-6.33634232283529	10.9073400101929	-32.3763406992865	6.9108441742687e-64	6.63844173306628e-61	135.31301507692
CLDN1	5.92097316796875	4.25802603320312	31.9240717315464	3.48689790094446e-63	3.09180554647591e-60	133.704345239143
NR3C2	-2.73165534436035	9.79777023324585	-31.6503735898019	9.36665067028988e-63	7.71209873403082e-60	132.721978420834
ENDOD1	-2.48254785127768	11.1603736283264	-31.3991104578133	2.33392356893944e-62	1.7659228618701e-59	131.814184109408
ATP11A	3.23484047249348	6.60961496984863	31.385663419265	2.45118120846027e-62	1.7659228618701e-59	131.765439253867
KLF4	-2.58284373673503	10.8631312056274	-30.5933256391726	4.53209296839077e-61	3.07302562627297e-58	128.863844111787
PLCE1	-1.96580136889649	9.9702553928833	-30.4287905333156	8.36592900112279e-61	5.35744797755236e-58	128.253961925052
HILPDA	2.67643084033202	8.89693048815918	29.7050828297415	1.27797378157037e-59	7.7532651474535e-57	125.540759390198
PDCD4	-2.29629917814128	10.4733814385376	-29.440434920723	3.50661613399992e-59	2.02103820883086e-56	124.535936169031
OGN	-5.64097479439291	6.53364410946655	-29.3519642226224	4.9213649382617e-59	2.70136064968298e-56	124.198496327174
NR3C1	-2.33249383203125	8.61516615795898	-29.2678075604919	6.79846332985242e-59	3.56208576378222e-56	123.876794655354
C4orf34	-2.37546780957033	10.6204634448242	-29.0289305983487	1.70746727808989e-58	8.55738057154006e-56	122.959827257938
MTHFD1L	3.13200997908528	5.64407366729736	28.9942316929549	1.95276026093086e-58	9.37894480322918e-56	122.826157448816
PJA2	-1.68387493294271	9.3887470793457	-28.9770997034945	2.08665560079082e-58	9.62115164412633e-56	122.760115912149
OTOP2	-5.92333964713542	9.320990578125	-28.9429495313743	2.38177381849738e-58	1.05595026176228e-55	122.628383963938
PLCL2	-2.50061452994792	7.58922105102539	-28.8081844582884	4.01881931677269e-58	1.71573815794218e-55	122.107395824701
SCARA5	-4.13904604752604	9.1712719140625	-28.4168371804089	1.85481248419841e-57	7.63586553762681e-55	120.584093502186
PRR7	2.46003343237304	8.76633705560303	28.4052889153323	1.9408897624763e-57	7.71470216967735e-55	120.538905940705
WDR7	-1.34632317578125	8.8311213503418	-28.2718146910034	3.28189836449924e-57	1.25130335534595e-54	120.015640345945
SPPL2A	-2.10445654777019	11.1951633200073	-28.2654585576783	3.36517775793568e-57	1.25130335534595e-54	119.990676531912
WISP2	-6.2597177397461	7.62142275476074	-28.2197001229206	4.03094867391683e-57	1.45202329263248e-54	119.810837060786
CEP72	3.24076892439778	5.92829009796143	28.1310346086192	5.72245490810948e-57	1.99887084017509e-54	119.461751193528
FUCA1	-2.11111689208985	12.2829049598389	-27.980393696515	1.03972814519461e-56	3.52498421460538e-54	118.866799903479
DENND2A	-2.52499607259115	9.35188455004883	-27.8681265985678	1.62498055043085e-56	5.3517573728047e-54	118.421874047445
DKC1	2.00708069091796	10.2787748057861	27.8522736477029	1.73092178310197e-56	5.54231538717122e-54	118.358941512257
XPO5	1.77362039176432	6.43359824963379	27.8425478871432	1.79932991535057e-56	5.60564214439081e-54	118.320319533601
MMP28	-2.31164880029297	8.97311063244629	-27.6984857086027	3.19851295981763e-56	9.70243654942574e-54	117.747076889272
ITM2A	-3.01708453255209	9.24932829858398	-27.6092269398338	4.57308906058053e-56	1.3516409641362e-53	117.390813376138
DUSP14	2.9465980415039	6.20833692687988	27.4674706252539	8.08210690344346e-56	2.32906115689982e-53	116.823290214148
CSE1L	2.19281611816406	10.4000303173828	27.1975919885669	2.40370508785731e-55	6.75792891408079e-53	115.736946610839
CIRH1A	1.86271753625488	8.70885398452759	27.1481251314338	2.93767348117271e-55	8.0625148136852e-53	115.536986559674
C1orf135	3.63076829386393	5.29890586309814	27.125726385039	3.21728522477487e-55	8.62456901999533e-53	115.446357992192
UGP2	-2.20429121435547	12.2257738577881	-26.9491760714568	6.59977940447091e-55	1.72899220898491e-52	114.730127012432
PTPN21	-1.87889169433594	8.31402961474609	-26.8715425683615	9.06138756419543e-55	2.32112476561068e-52	114.414121416656
UTP14A	2.13252604915364	6.094093140625	26.8197352601445	1.11999965587158e-54	2.80657305070254e-52	114.202878870421
C3orf26	2.5237415320638	9.58965362316895	26.7979729473653	1.22436357815512e-54	3.00281680114767e-52	114.114057207849
SLC25A34	-3.00131861132813	8.40935778149414	-26.754801603306	1.46127585034286e-54	3.45038821314911e-52	113.937704001431
MET	1.8480149391276	11.0015229829102	26.753894242597	1.46672180484346e-54	3.45038821314911e-52	113.933995302219
EIF3B	1.5708326344401	11.7040311757812	26.7398844411324	1.55344837100031e-54	3.58131987450411e-52	113.876721032935
CLEC3B	-4.66701206681315	11.3427469944458	-26.6482417348193	2.26319350745794e-54	5.11526109028778e-52	113.501545607371
PKIB	-3.91327391357422	9.30145363269043	-26.5810600039139	2.98382904985633e-54	6.5799994393823e-52	113.225930358243
SLC7A5	5.29948589729818	4.80727923034668	26.5776990390181	3.02541832469213e-54	6.5799994393823e-52	113.212128968117
PRPH	-3.39625992757162	7.75079366760254	-26.5478304943236	3.42162275908894e-54	7.30389732296634e-52	113.089423296883
HIGD1A	-2.22655750797527	10.2576155284424	-26.5325506234042	3.6440975443443e-54	7.63736588975578e-52	113.026613013726
DDX10	1.65986740372721	9.30041817474365	26.5071274601596	4.04699917814136e-54	8.33031420114919e-52	112.92205061115
LPAR1	-1.98711115905762	7.39443315786743	-26.5025896132223	4.12349437308372e-54	8.33886309448002e-52	112.903379561762
INHBA	3.76671538273112	5.35298370074463	26.4922855872202	4.30263852820521e-54	8.55112315769335e-52	112.860975105037
CRYBA2	-3.27767147843424	8.80428909490967	-26.481213020398	4.50388639336199e-54	8.79937261970909e-52	112.815394900669
GTPBP4	1.54633815934245	9.65410346716309	26.3824149229738	6.77613271577639e-54	1.30180803024591e-51	112.408097993293
CPNE7	5.65451020483398	6.91351775506592	26.368320606526	7.1833320808628e-54	1.35741424419845e-51	112.349906629437
TOMM34	2.10575536564127	8.90232638519287	26.3252007746326	8.58857136772976e-54	1.59383096180369e-51	112.17174169936
RPP40	2.24020239648437	6.84420655419922	26.3217877248862	8.71096994826342e-54	1.59383096180369e-51	112.157630734884
DCUN1D5	1.77561390112305	9.46413792523193	26.2769885188027	1.0490193112013e-53	1.88938212503396e-51	111.972293305423
SYNC	-1.91718609545899	8.40652642755127	-26.2390057388203	1.22826785434635e-53	2.17819131646929e-51	111.814982621583
RNASEH2A	1.948689521403	9.87885687530518	26.1279283370647	1.95000093651826e-53	3.40570618109788e-51	111.354026452752
CHRDL1	-4.76700240559897	7.08577629370117	-26.1031864339872	2.16186487315818e-53	3.71937558102901e-51	111.251164938671
BCAR3	-1.91721250801596	9.0295999593811	-26.0203901771185	3.05448175321599e-53	5.17779576019422e-51	110.906455409334
GGCT	1.64816442358397	11.7144131991577	25.9772324420352	3.65857063587332e-53	6.11193387242199e-51	110.726472712226
PSAT1	4.10757812858072	6.82279398291016	25.8686357635362	5.76653059594159e-53	9.49582831134554e-51	110.272668739008
BMP2	-2.35620309187826	8.96122174639892	-25.8376005124855	6.56886095904671e-53	1.0664684545765e-50	110.142736637141
SLC5A6	1.76429942041015	7.77262768615723	25.8286664127955	6.82000924527515e-53	1.09186453569843e-50	110.10531318872
NR5A2	-2.33996733414714	9.27205538220215	-25.814908780278	7.22578391144508e-53	1.14098097461955e-50	110.047667299667
DNAJC2	1.45049139697265	10.5324611949463	25.7948658760499	7.8608285461907e-53	1.22448338718838e-50	109.96364755198
LDHD	-3.32793325651042	10.7426863464355	-25.7250317827777	1.05459017022832e-52	1.62083478562958e-50	109.670551623726
RDH5	-2.26566320483398	8.98433900177002	-25.7031675399918	1.15634325766204e-52	1.75383799093031e-50	109.578674186483
ATP8B1	-1.84378084863282	12.7202624370117	-25.6919319124914	1.21241846067048e-52	1.81500618131801e-50	109.531439187834
SNX24	-2.02873529256185	9.31755642010498	-25.615693331256	1.67247917962854e-52	2.44930794188243e-50	109.210554225559
CHP2	-3.8265679761556	14.2031008048706	-25.6148246582311	1.67862694030287e-52	2.44930794188243e-50	109.206894246361
STX12	-1.30449840470378	10.4450625667114	-25.4771620976551	3.00565526017858e-52	4.33077352300981e-50	108.625804473585
PDE2A	-2.17482965315756	8.16558678674316	-25.4499164519617	3.37378757619894e-52	4.80119128282039e-50	108.510543395043
MCM3	1.6454108293457	11.2567637962036	25.3492632466929	5.17373561528129e-52	7.27288419967652e-50	108.084006099776
SYTL4	-1.62835771370443	7.88465948449707	-25.3392669582782	5.39849151536225e-52	7.49739899970851e-50	108.041582099532
ZAK	2.50607259765625	8.17425983374023	25.3100090043741	6.1144106362103e-52	8.39057278614239e-50	107.917346754326
NAT10	1.63585649454753	8.54153807684326	25.1948900517162	9.98971015286368e-52	1.35472222273011e-49	107.427581031211
GREM2	-4.22176978287761	7.84135223950195	-25.1689352166662	1.1161184075945e-51	1.49598800980718e-49	107.316949006068
LOC100132724	1.88489872908528	6.46402591168213	25.1639038324004	1.140379676872e-51	1.51093753279351e-49	107.295493908977
TGFBI	3.41179750638834	11.6583421905212	25.1532341900496	1.19359898304949e-51	1.56347903154676e-49	107.249986271998
VPS4B	-1.41723299755859	10.9161385648193	-25.1298820043214	1.3189640078752e-51	1.70828068750309e-49	107.150340223363
ABHD3	-2.40121917582195	9.48509699563599	-25.0991031345245	1.50467487179224e-51	1.90018731476298e-49	107.018908418905
RIPK2	2.12124039827474	8.02989383825684	25.0982714653104	1.51004247974899e-51	1.90018731476298e-49	107.015355522649
CDKL1	-1.82849575325521	8.00962881030273	-25.0972611243971	1.51658916420746e-51	1.90018731476298e-49	107.011039233108
NKRF	1.58210440568034	7.84281528485107	25.0629194136945	1.75694445633255e-51	2.17766653205863e-49	106.864258012039
SNTB1	2.99166164567057	5.7324861427002	25.0583405441964	1.79176496217819e-51	2.19045098216136e-49	106.84467707152
ZBTB7C	-2.23628260546875	8.38177877539063	-25.0565894013769	1.80526453808735e-51	2.19045098216136e-49	106.83718790087
ENTPD5	-2.19578080891928	8.19376574291992	-24.9859214516494	2.44465441367914e-51	2.93536785692494e-49	106.534666112327
XLOC_013461	-3.06230957600912	8.61031372155762	-24.9061999785293	3.44396698489563e-51	4.09263994174143e-49	106.192697747043
TMEM236	-3.15989402579753	9.22969864678955	-24.8531198095972	4.32847265347239e-51	5.09125553842614e-49	105.964602082657
SULT1A2	-2.93138164331055	12.2985980952759	-24.8188781731143	5.01707581050378e-51	5.84087430584808e-49	105.817286603299
NKD2	4.66002892000325	6.36164428582764	24.8165770133711	5.06712440864759e-51	5.84087430584808e-49	105.807381620536
ST6GALNAC6	-3.44787661466472	11.6970741704712	-24.8015061986033	5.40755734830877e-51	6.17157559940151e-49	105.74249651677
CD3EAP	2.73149983365885	7.06445836425781	24.7936417199766	5.59425162585205e-51	6.32205279325457e-49	105.708626768612
CA2	-5.05887049869792	14.1329506696777	-24.7550505348319	6.6087634492007e-51	7.39604041543072e-49	105.542323370685
PLCD1	-2.76059140201823	10.3687971689453	-24.7424862573105	6.97751208227203e-51	7.67695667029886e-49	105.488142135458
SLIT3	-3.47257028474935	9.45830959197998	-24.7419740333564	6.99297692705284e-51	7.67695667029886e-49	105.485932871822
XLOC_l2_005039	1.37222347151692	9.01209770031738	24.7033680666081	8.263557420876e-51	8.98622890475827e-49	105.319334666207
DCAF13	1.8372948009847	8.3195603399353	24.6408328460589	1.08335352646771e-50	1.16708561678442e-48	105.049106437046
SSB	1.08385053800455	11.0851422671509	24.6186552410885	1.19268007127522e-50	1.27296510940643e-48	104.953163069076
PAPSS2	-2.1204630069987	11.3894607730713	-24.6098550844657	1.23907844930328e-50	1.30708354635395e-48	104.915076530968
MIER1	-1.42521210083009	10.0715222914429	-24.608325704803	1.24732532401262e-50	1.30708354635395e-48	104.908456550734
ZNF575	-2.36458837166342	9.14332354779053	-24.5999404779842	1.29353237768985e-50	1.33534549273969e-48	104.872155929068
AHCYL2	-2.84670866796876	12.1397384162598	-24.599240940238	1.29746417269754e-50	1.33534549273969e-48	104.869127179097
SCGN	-5.29412485119629	8.37786323165894	-24.5842112338925	1.38490593516234e-50	1.41272661191294e-48	104.804040131404
GUCA2B	-6.35266583475749	10.9680279710388	-24.5543861710852	1.57638322359325e-50	1.593944685821e-48	104.674803013511
PHF16	1.56023203361003	6.78688029241943	24.5474134843838	1.62486281464348e-50	1.62867770994742e-48	104.644574218617
RNF152	-3.58873664404297	7.43332145300293	-24.531630932718	1.74020952291705e-50	1.72925820436766e-48	104.576130950497
LAGE3	1.47221373168945	11.0866864192505	24.5260923975881	1.78261196870322e-50	1.75625368916598e-48	104.552105424928
SMYD5	1.81637292529297	7.10442484680176	24.4994495458319	2.00157952150921e-50	1.95527179190142e-48	104.436481801846
SKA3	3.22607210148112	5.69759285845947	24.4709602663023	2.26576683269921e-50	2.19474741853141e-48	104.312753453922
MMP7	6.67733416853841	5.23299051885986	24.446799520683	2.51714860735213e-50	2.41793099974566e-48	104.207749539072
ARID3A	2.97205144649251	6.83198461361694	24.4268791448877	2.74539577407504e-50	2.61538653617876e-48	104.12112317576
PI16	-5.26589108374024	8.71978367901611	-24.4156671931741	2.88290627938134e-50	2.72387382642858e-48	104.072346121503
C4orf19	-1.77134218986003	9.57183552520752	-24.4075043205738	2.98736151909558e-50	2.79961920574103e-48	104.036824685709
TTI1	1.36242284513346	9.69133391546631	24.3721292875964	3.48588273247423e-50	3.24046534332504e-48	103.882797058412
RAB36	3.11723570857748	5.74374700396729	24.3675659799479	3.55601378717916e-50	3.27921367398513e-48	103.862917132732
TRIP13	3.23051365844726	7.35125258868408	24.3465449193754	3.89786302037399e-50	3.56592595522626e-48	103.771307938152
SLC4A4	-4.97086964794921	10.893889774292	-24.3339335575153	4.1186292193238e-50	3.73822354418468e-48	103.716323110909
PLSCR4	-2.06199732836914	8.48983082635498	-24.3214160248636	4.35019490708338e-50	3.91755442921485e-48	103.661728925647
CAPN13	-2.92664157381186	9.17992689764404	-24.2962209197691	4.85677942828652e-50	4.33985243952393e-48	103.551786800755
C16orf89	-3.06012471516927	8.31471856445313	-24.2882453931173	5.02919776783988e-50	4.45935097460695e-48	103.516969020398
GLIPR2	-2.06884437902832	9.43615314047241	-24.2840353916913	5.12268128669061e-50	4.50756848791471e-48	103.498586919877
MFSD4	-3.10117335270183	9.25116010583496	-24.2515868126104	5.90441213868704e-50	5.15607263050345e-48	103.356837024928
SLCO4A1	3.67818336474609	7.38756634851074	24.241793288511	6.1631528910418e-50	5.34155363722097e-48	103.314030218658
RAE1	1.55729824877929	11.4561375067749	24.2126299434727	7.00321204299392e-50	6.02433024026798e-48	103.186492460742
LOC100289255	-1.90502006258139	9.64400407159424	-24.2035322283283	7.2881602639322e-50	6.22300913795159e-48	103.146685656776
SLC29A1	2.30300936360676	7.80991715795898	24.1880396452485	7.80051011247961e-50	6.61150588724651e-48	103.07887585299
C2orf88	-3.69178983671061	9.03426122128296	-24.1203442959469	1.049998638914e-49	8.83455059179688e-48	102.782246840482
LMTK3	3.69475934847005	5.44944524938965	24.0972025659983	1.16242024234435e-49	9.70957835761107e-48	102.680719882475
STYK1	-2.30078772875977	9.66312181292725	-24.0493966226367	1.43451182756446e-49	1.18961279398098e-47	102.470786216161
CLMN	-1.65344522322592	9.88056704071045	-23.992217670733	1.84546566770933e-49	1.51947733940611e-47	102.219337176302
NIT2	1.24162069596353	10.2108581894531	23.9602146587727	2.12525261487432e-49	1.73743169444371e-47	102.078432349029
CLDN2	6.80476763387044	4.45570034051514	23.9411368978383	2.31196077888563e-49	1.86626771847956e-47	101.994377845675
DHX37	1.32723049837239	8.5374384440918	23.9408170728279	2.31522758517027e-49	1.86626771847956e-47	101.992968364154
KCTD12	-2.62564365096029	10.8614999923706	-23.9253217141477	2.47919342435683e-49	1.98455990295564e-47	101.924665164964
WDR12	1.63895409456379	8.86076428161621	23.8901315832765	2.89629514988006e-49	2.3024547719081e-47	101.76944198094
PRKAR2B	-2.00172066414388	7.46413944195557	-23.8791975998147	3.03975629225412e-49	2.39995005348036e-47	101.721182379949
CDK5RAP1	1.67831408618164	7.97432505426025	23.8753892887658	3.09138499506057e-49	2.42410849238525e-47	101.704370204847
CCT6A	1.34787196451822	11.4093878720703	23.8535976596052	3.40424502334364e-49	2.65140083676231e-47	101.608135692728
TBC1D16	2.1029501344401	6.1701224453125	23.84321216472	3.56436955907519e-49	2.75748240989662e-47	101.562252202851
ODF2	1.30670635327148	6.95843874090576	23.8315502913221	3.75322431461966e-49	2.88080021970269e-47	101.51071433398
CDKN2B-AS	-4.38300175927735	8.68391532678223	-23.8303182110433	3.77375581829709e-49	2.88080021970269e-47	101.505268398201
PADI2	-3.12348431632488	8.47944380853271	-23.8240429800788	3.88009345383731e-49	2.94248929226202e-47	101.477528356317
FAS	-1.90771023229981	8.4657839881897	-23.8223581306571	3.90915413476878e-49	2.94515161512939e-47	101.470079578424
TSPAN7	-2.82829147705079	8.52932385925293	-23.8149304466749	4.03990167050157e-49	3.02389263349815e-47	101.437237500873
RNF11	-1.21368895922852	11.1514799796753	-23.8108367548852	4.11383324350283e-49	3.05936489018433e-47	101.41913411952
IPO5	1.45930271028645	8.54457408422852	23.7854313263222	4.60408723716087e-49	3.40200728094572e-47	101.306740011198
PPAP2A	-2.39836889013672	11.6787410267334	-23.7673897664109	4.98755243216596e-49	3.65170083394827e-47	101.226877107026
MZT1	1.90989122526041	8.00841081494141	23.7665858690718	5.00536767384252e-49	3.65170083394827e-47	101.223317666217
POLR1B	1.72411841064452	7.06734355212402	23.7401524011942	5.62823159707402e-49	4.08029091946366e-47	101.106234469039
C7orf40	2.0695076759847	8.98555686410523	23.7257940833934	5.99866634162939e-49	4.32166418249763e-47	101.042601459178
CDK4	1.79147260009766	10.3324452655029	23.7163286614743	6.25618743314554e-49	4.47919705228998e-47	101.00063926763
TPX2	3.01377943579101	8.38858217486572	23.6636163621837	7.90778438974899e-49	5.58891442999929e-47	100.766758938765
ZER1	-1.40667535375978	11.783011982605	-23.6623737539148	7.95160897475391e-49	5.58891442999929e-47	100.761241578001
MOB3B	-1.73280062304688	9.71423281054687	-23.6582732661305	8.09796680147086e-49	5.65728868609422e-47	100.743033508451
UBE2C	2.96889013972981	9.83084527166748	23.6216688505504	9.53067233398741e-49	6.61807590324535e-47	100.58040381029
RANGAP1	1.5345690452474	12.3241783908691	23.6168293645482	9.73827984102332e-49	6.7217456124237e-47	100.558890467349
CA12	-2.68865519775391	10.0335045010986	-23.5862099210917	1.11615043058744e-48	7.65825357939371e-47	100.422710483926
MRPS17	1.44026202058919	10.3870716530151	23.5839567999931	1.12741503974948e-48	7.6897711024806e-47	100.412685292007
NEBL	2.01575090726725	6.90113290426636	23.5821952303757	1.1363017149804e-48	7.7047940403406e-47	100.404846819419
KRT23	7.52234842529297	4.56281419763184	23.5476805768603	1.32536419240719e-48	8.93419476367115e-47	100.251191622355
RAVER2	-1.39411661710612	8.38565013812256	-23.5237463938427	1.47476389219535e-48	9.88349034031154e-47	100.144555571488
B3GALT4	-1.87124898331706	11.2147252987671	-23.5198961065054	1.50033264512989e-48	9.96690740894168e-47	100.127394633633
DAO	-4.76197208288574	7.48382588052368	-23.5192742125958	1.50450411135235e-48	9.96690740894168e-47	100.124622652135
CCNE1	1.66759371158854	8.9919362019043	23.5052346731178	1.60184545650034e-48	1.05511271869025e-46	100.062031549159
RBM28	1.3920577051595	8.74354217230225	23.4910558589284	1.70658628821195e-48	1.11771705364881e-46	99.9987955146071
PARM1	-2.47862219653321	11.0599971974487	-23.4884674773959	1.72643791429476e-48	1.12433049932631e-46	99.9872489966997
KAT2B	-1.73444122257487	7.80082443206787	-23.4399721575709	2.14446625854324e-48	1.3887226158555e-46	99.7707672675407
HSD11B2	-2.42334741276042	13.2483036203613	-23.4220599904125	2.32344159342191e-48	1.49621850543991e-46	99.6907363570863
UGDH	-1.83867052807618	10.7393611702271	-23.4178079614703	2.36808926244215e-48	1.51649805156504e-46	99.6717327778496
PPP2R3A	-2.18535960538737	8.39519653314209	-23.406878674846	2.48685132970483e-48	1.58375333024904e-46	99.6228765692074
SND1	1.19761619466146	11.9443644729004	23.3729640897021	2.89491129324086e-48	1.8334968394059e-46	99.4711796977043
GRAMD3	-1.80336387902833	9.06422935140991	-23.3699792021324	2.93390205474926e-48	1.84803764945873e-46	99.4578219330401
RFC3	2.86776378955078	5.9955976192627	23.3534727798504	3.1592584612942e-48	1.97917240670316e-46	99.3839341378575
VSNL1	4.01484413126627	6.38563836981201	23.3297100099591	3.51461888752008e-48	2.189892536024e-46	99.2775070389131
NSUN5	1.51928152156575	10.4566962973022	23.3019030821328	3.98186925158579e-48	2.46768854102309e-46	99.1528807601038
IPO7	1.22344573372396	8.44873494018555	23.2903380326983	4.19415519666288e-48	2.58534903486273e-46	99.101020552761
VMA21	1.09971957088215	9.95554614923096	23.2839827480422	4.31562161292901e-48	2.64607289001238e-46	99.0725151939853
TRIB3	3.41305781583659	9.92574902142334	23.2583942283778	4.8415736780039e-48	2.95284760774344e-46	98.9576936475234
C10orf35	1.91748809431966	7.16755508111572	23.2416417763536	5.22037921438512e-48	3.16712164232723e-46	98.8824787109534
LRRC19	-2.93427093709311	12.5927368361206	-23.2174980209672	5.81939036919259e-48	3.51204778982634e-46	98.7740187183511
EPB41L4B	-1.46623643758138	11.7438518259888	-23.2012052524954	6.26223952925629e-48	3.75962682571548e-46	98.7007875488825
LOC100507056	5.12510238883463	4.58811826940918	23.1477549646173	7.9674846490359e-48	4.7586111683646e-46	98.4603187284092
HSPD1	1.59845671313476	14.2968242122192	23.1319780490436	8.55503727852772e-48	5.08319147987573e-46	98.3892734266005
GMPS	1.41729703181965	9.9765046248169	23.1096631015704	9.46128407221946e-48	5.59283187181916e-46	98.2887350809612
GART	1.43390951839193	8.21652154406738	23.0333720427591	1.33550426781893e-47	7.85426413017795e-46	97.9445549746856
DPT	-4.57054612255859	9.44711496057129	-23.0318506919795	1.34472505900978e-47	7.86834809908923e-46	97.9376843526656
CNNM4	-1.60177613199871	12.630255223999	-23.0233358972376	1.39752755132406e-47	8.13601014349111e-46	97.8992252173168
GPA33	-1.90518093823243	14.9868621543579	-23.019664708015	1.42093237568005e-47	8.23069723339896e-46	97.8826406823755
LIMA1	-1.77305973421224	12.8088628475342	-23.0114293845014	1.47487922908994e-47	8.50046643685985e-46	97.8454317888955
HEATR1	1.5093206956787	8.57068097189331	22.9972763798297	1.57244868291762e-47	9.01771938706038e-46	97.7814663270424
TCOF1	1.60988634179688	9.48859568041992	22.9911236941334	1.61686530514239e-47	9.22653780810711e-46	97.753651251385
FMO5	-2.35493830729167	9.51222081982422	-22.9085853233921	2.35045194223472e-47	1.33466303143545e-45	97.3800661139463
DIMT1	1.47366705126953	9.12217781140137	22.9072107661951	2.3651583366747e-47	1.33643039935535e-45	97.3738375695103
LGALS4	-1.79184775634766	15.9235875301514	-22.9041484072333	2.3982562004683e-47	1.34852191330723e-45	97.3599602444373
IL1R2	-2.7725485316569	7.95570092437744	-22.9002642831774	2.44090674955066e-47	1.36584136417818e-45	97.342357380613
PA2G4	1.43093484773763	12.8051765553589	22.8938395014031	2.51313704991786e-47	1.39946525480209e-45	97.3132362101229
TOP1MT	2.03343715535482	10.1841154071655	22.8666477130531	2.84342959875118e-47	1.57577947042331e-45	97.1899301118704
FGD4	-1.43806680045574	9.60096404345703	-22.8195567286913	3.52212396733101e-47	1.94256090772366e-45	96.9761740859495
GPSM2	1.78681204911295	8.03482086575317	22.8179009845823	3.54874956541902e-47	1.94792553526595e-45	96.9686533830263
GNPDA1	1.9231498219401	6.59483269482422	22.8115772291808	3.65231696703208e-47	1.99527287578098e-45	96.9399266081472
ILF3	1.07106724357096	8.80770442669678	22.8054935529289	3.75482112491314e-47	2.04159542956952e-45	96.9122858247717
PKMYT1	2.66819694425456	9.41918059844971	22.803873876715	3.78259559921983e-47	2.04704128977498e-45	96.9049261701402
SSBP1	1.13603657051594	11.1224606685486	22.7894919062262	4.03846500826828e-47	2.17529841823872e-45	96.8395618040734
VDR	-1.48988684790039	12.350103218689	-22.7653947017901	4.50681293119241e-47	2.41628058873744e-45	96.7299861726887
C16orf13	1.26471780957031	11.1474530380859	22.7626758191813	4.56297561040987e-47	2.43506573431456e-45	96.7176183194607
LRRC20	1.9257953375651	8.20833356176758	22.7472704879395	4.89475544485859e-47	2.6000850697182e-45	96.6475243403715
KLF3	-1.11391153710938	11.3847737189941	-22.7453089328331	4.93870701818298e-47	2.61139797241262e-45	96.6385972164099
AGPAT9	-2.56154777384441	9.99837654278564	-22.7295059074942	5.307593139172e-47	2.79363589567286e-45	96.566659774483
CHST5	-3.2320956582845	10.8794719336548	-22.7281294331238	5.34100733450826e-47	2.7972942503804e-45	96.5603924358483
CDC25B	3.01970194925944	8.22326170223999	22.72722497934	5.36307824528558e-47	2.7972942503804e-45	96.5562741667077
NCL	1.32929515836588	12.7932636964111	22.723677169772	5.45054289501936e-47	2.83010846625622e-45	96.5401188813121
IFITM3	2.22596334993489	13.561256645752	22.7223392653731	5.4838977494744e-47	2.83465871561397e-45	96.5340262074172
CDCA7	2.16101345296224	8.77709186779785	22.7108378379358	5.77923912277696e-47	2.97398613251116e-45	96.4816408948768
SMPD4	1.22715176261393	11.6935924697876	22.6976274826115	6.13826313798574e-47	3.13482376965487e-45	96.4214519776256
SDCBP2	-2.97484720499675	11.3215300773315	-22.6973450165403	6.1461800289928e-47	3.13482376965487e-45	96.4201647745466
PLXNA1	1.80475708227539	9.17182914678955	22.6946541534274	6.22211574809256e-47	3.15957393076048e-45	96.4079019718853
GCG	-4.42859907910157	9.33231352709961	-22.6835182322787	6.54653565427729e-47	3.309733179248e-45	96.3571439159536
PTPRH	-2.40093001627605	11.6597139299316	-22.6789578072842	6.68425523738746e-47	3.36460306206835e-45	96.3363528979243
TMEM82	-2.08511006396485	10.6961084361572	-22.6724884573915	6.88463657885334e-47	3.45040025410619e-45	96.3068547025313
ZZEF1	-1.87688803987631	10.664388644165	-22.6688718056382	6.9992804374583e-47	3.492671238207e-45	96.2903616758941
GPD1L	-1.4086308795573	11.0051307768555	-22.6646834721461	7.13444775542934e-47	3.54477496882905e-45	96.2712596042123
NAAA	-2.7880544272461	9.79155904919434	-22.6477930506042	7.7067185360427e-47	3.8126757324019e-45	96.1942042689884
GUCA2A	-5.519426734375	13.6938981923828	-22.6415570714414	7.92948421254994e-47	3.90611814179757e-45	96.1657464358815
CDHR5	-2.5728397541504	10.0971463478394	-22.6373402214141	8.08378088531519e-47	3.96518052191609e-45	96.146500177074
LITAF	-1.67793471464031	10.2970048334656	-22.6301006270478	8.35575790576642e-47	4.08122124490549e-45	96.1134526286304
HHLA2	-2.76833543017579	9.54219862243652	-22.61489695471	8.9572694918309e-47	4.35655887900147e-45	96.0440294540638
BCAS1	-2.76092975341797	11.4073326500244	-22.608282141533	9.232395860636e-47	4.47150533972904e-45	96.0138159672396
HSD17B2	-3.78663487394207	11.7006143895874	-22.5985351514506	9.65336513917713e-47	4.65583012381986e-45	95.9692863205585
POP7	1.01538742293294	12.2744844032593	22.5667928233654	1.11628695179557e-46	5.36143320556145e-45	95.8241889457133
LOC389033	-3.37369157185873	9.48974537542725	-22.5532103348589	1.18793105800016e-46	5.6705943558159e-45	95.7620642162785
BOP1	2.35698322135416	8.69202582202148	22.5527396215032	1.1904952148065e-46	5.6705943558159e-45	95.7599108215073
GTF2F2	1.40629813334146	10.0916964338074	22.5473844551486	1.22006176738069e-46	5.78751110806468e-45	95.7354103703708
LOC100653206	-2.07562043025716	7.64210272283936	-22.5400218830776	1.26192112267786e-46	5.96154294307691e-45	95.701720072368
CCL14	-2.62764745743815	8.70090378717041	-22.5375210452028	1.27646568943097e-46	6.00564081717176e-45	95.6902750048401
SST	-4.83755647241211	7.83903500909424	-22.534351371556	1.29514266765519e-46	6.06874371140705e-45	95.6757679102348
TMEM161A	1.59982936515298	10.5576221008911	22.5326775662706	1.30511604247044e-46	6.09071766054931e-45	95.6681066700532
CCL23	-4.97001179410807	6.55598922521973	-22.5104175554189	1.44533722702626e-46	6.71790411932727e-45	95.5661867427623
P2RX4	-2.04645148632814	12.9202845141602	-22.5058662324303	1.4758226579969e-46	6.8216967146048e-45	95.5453405023057
TNXB	-2.58327858642579	8.90715745812988	-22.5053230471	1.47950392873358e-46	6.8216967146048e-45	95.5428524023269
PXMP2	-1.53722980712891	11.3975972425537	-22.5021256455586	1.50136129121511e-46	6.89489705332134e-45	95.5282057359836
EXOSC8	1.43862551936848	10.5665848839111	22.4987889990343	1.52451693332241e-46	6.9694250934313e-45	95.5129198747686
CBX2	4.43514652482096	5.20558564007568	22.4980516727662	1.52968209303211e-46	6.9694250934313e-45	95.5095418473198
ZNF239	2.70764281323242	6.34628306195068	22.4883634591961	1.59920849782627e-46	7.25751037576512e-45	95.4651495146251
PRDX6	-1.65258623413087	13.0317536531372	-22.4659270147555	1.77267484968167e-46	8.01318548716884e-45	95.3622992014975
NCAPD3	2.08227913712565	7.44868886859131	22.4613605340708	1.81023517915774e-46	8.15100816802783e-45	95.3413585280376
MYC	2.78341918652342	10.6160570761719	22.4476185031852	1.92816561139569e-46	8.64823540955567e-45	95.2783257158363
C20orf20	1.95621509008789	8.29473785089111	22.4341515599881	2.05123151524213e-46	9.16455258767289e-45	95.2165321274939
RECQL4	2.90521840055337	9.64252028308105	22.4197223078271	2.19187487402802e-46	9.7551126150274e-45	95.1502981510792
RRS1	2.23324439575195	8.73103132769775	22.3955438310644	2.4496339885498e-46	1.08603580715437e-44	95.0392552018293
XPOT	1.85861068587239	6.76680437866211	22.3936043391524	2.47158635071043e-46	1.09156995649958e-44	95.0303446983531
CCT3	1.29444966455077	12.3055672059326	22.3835771657738	2.58827604086736e-46	1.13484421037917e-44	94.9842699958773
PINK1	-2.00542295076498	11.1495503746948	-22.3834945415671	2.58926023535804e-46	1.13484421037917e-44	94.98389028745
MCM7	1.97478052026366	9.67989141473389	22.371875132255	2.73148355066618e-46	1.19264435183822e-44	94.9304836565236
DDX27	1.53401430301921	10.8337305254211	22.3623747127354	2.85359096010938e-46	1.24125822630871e-44	94.886804223752
HSPH1	2.06242420263671	9.94583722937012	22.3570183884441	2.92484012977143e-46	1.2674673750329e-44	94.8621729062617
CTPS	2.53533579597982	7.80365489691162	22.3504747163881	3.01431621133903e-46	1.30134917483539e-44	94.8320767074867
C17orf96	5.18376750667317	5.99167239367676	22.3338351523338	3.25444149758507e-46	1.3997741471143e-44	94.7555228377911
ACTR3B	1.17607658040364	6.82639083032227	22.3301245367448	3.31056108350976e-46	1.41861849849877e-44	94.7384466967247
CASD1	-1.38641011669922	7.47630548425293	-22.3262056687331	3.37088750441305e-46	1.43911926901367e-44	94.7204103383545
NEDD4L	-1.71089875447592	8.67157869256592	-22.2961846551553	3.87124801362088e-46	1.64663748535084e-44	94.5821774748135
RHBDL2	-2.47471948323568	9.35278990759277	-22.2934548137655	3.92029668539597e-46	1.66136984899115e-44	94.5696022968822
LOC646627	-4.53549497941082	11.9413035614624	-22.2783579845851	4.20305819796565e-46	1.7746758918663e-44	94.5000412188769
PDCD2L	2.09251172542318	8.22888001965332	22.2706786901381	4.35467251276071e-46	1.83198211878076e-44	94.4646468202137
ATAD2	2.1650476015625	8.27179025366211	22.2594520588034	4.5862789150741e-46	1.92240134742033e-44	94.4128893800302
PUS1	2.0832924469401	7.95351552807617	22.2572878688444	4.63233094733963e-46	1.9346695228255e-44	94.4029101579228
HPGD	-3.1509398359375	8.95190475415039	-22.2557504527931	4.66532807262998e-46	1.94141648711934e-44	94.395820679604
TMIGD1	-6.16759724316407	10.5685970859375	-22.2493967674131	4.80422166384423e-46	1.9920238532062e-44	94.3665188642323
CPNE8	-2.17949387052409	7.24851417779541	-22.247801718891	4.83973826485753e-46	1.99955781286784e-44	94.3591620632309
IMPDH1	2.26425687150064	11.4643817018433	22.2393224425776	5.0330259107333e-46	2.07198891689367e-44	94.3200480333828
AMPD2	1.57604600838216	7.04718365753174	22.2349590376847	5.13549778174384e-46	2.10665063808403e-44	94.2999166290572
TEAD4	2.57456713024902	6.93343956161499	22.2262786818479	5.34563282004743e-46	2.18507480555627e-44	94.2598611401592
AZGP1	3.88610095987955	6.08135198126221	22.200745361584	6.01524511154373e-46	2.45009648059239e-44	94.1419836150387
SHMT2	1.60586581966146	10.8843177126465	22.1968803345691	6.12371255780439e-46	2.4854941779511e-44	94.1241332380353
RNF43	1.971656193278	11.6706913469849	22.179132748067	6.64759305199403e-46	2.68865982843281e-44	94.0421434099208
E2F6	1.46982540161133	7.38215580474854	22.1574062445296	7.35071090504121e-46	2.96264491616818e-44	93.9417187703266
LAMA1	-3.8037654987793	10.1462840776978	-22.1371281481635	8.0743207918486e-46	3.23883455259545e-44	93.8479362100643
C1orf112	1.84085220060221	8.09037280609131	22.136651392356	8.09216926474789e-46	3.23883455259545e-44	93.8457306866729
RCL1	1.71763635123698	8.15505860107422	22.126239440128	8.4920166799069e-46	3.37549511049886e-44	93.7975568534332
CDCA5	2.40691507324218	9.28374080078125	22.1262352902884	8.49217994313064e-46	3.37549511049886e-44	93.7975376503504
SLMO1	2.62435104549153	6.08197418267822	22.1226206821786	8.63559171348753e-46	3.42070328801961e-44	93.7808105015396
C13orf27	1.89179351635742	7.44027457220459	22.1175481646903	8.84096418938852e-46	3.49006144558498e-44	93.7573339231356
NUP205	1.21021678068033	10.5882363471069	22.0916298974907	9.96958085117675e-46	3.92216240517114e-44	93.6373294253338
CWH43	-3.7334701908366	9.00201789337158	-22.0637439649768	1.13463290865518e-45	4.44788478833034e-44	93.508121329931
TONSL	-2.47990428369141	10.7902614866943	-22.0630473708409	1.13830659543459e-45	4.44788478833034e-44	93.5048924595878
ETHE1	-1.96478157625326	12.3499726331177	-22.0563336847354	1.1743321871659e-45	4.57315105454775e-44	93.4737699275492
DHRS11	-2.11647238773601	9.14538803945923	-22.0431988980583	1.24816393127587e-45	4.8443049278845e-44	93.4128650115732
PRPF4	1.11511937963867	8.87359802606201	22.0378965925883	1.2792754410431e-45	4.9483919492966e-44	93.3882725905882
PRMT3	1.78041909106445	6.33929351690674	22.0228785390579	1.37169344778264e-45	5.28813055939483e-44	93.3185989745242
TMCC3	-2.64089926904298	9.29581321569824	-22.008664570842	1.46534280462323e-45	5.63033550296398e-44	93.2526299582117
CAPN5	-1.64409631111655	13.1608874887085	-21.9864373596149	1.62484844420893e-45	6.22246777953367e-44	93.1494200234179
MAOA	-2.13670809578452	12.905817522522	-21.984950653598	1.63612037078061e-45	6.24488725628744e-44	93.1425144544008
CCDC86	1.43256929248046	11.2403426947021	21.9811851381186	1.66502291243632e-45	6.33423072991862e-44	93.1250228624348
EDN3	-2.28183865136719	8.09233270727539	-21.9776935470375	1.69228157796498e-45	6.41675320697443e-44	93.1088021300907
DARS	1.1049597746582	11.4015157651978	21.9710450442872	1.74543330717574e-45	6.59659335469337e-44	93.0779112790484
WDR3	1.60703044620768	7.17426756378174	21.9394133863577	2.02224936546002e-45	7.61780014237177e-44	92.9308662116065
C19orf48	1.88110292032877	10.1088589118042	21.9323007704973	2.09034295212881e-45	7.84865902579441e-44	92.8977848794304
LYAR	1.92872902539063	8.15155665991211	21.925979085921	2.15279791837449e-45	8.05691610555286e-44	92.8683769453378
TEX10	1.42458459895833	8.91172599926758	21.923061143548	2.18225540047668e-45	8.14073074475558e-44	92.8548012498847
MATN2	-2.36436233658855	8.29522843334961	-21.9113711825777	2.30439111542208e-45	8.56861818950656e-44	92.8004032029918
PHF19	1.96888506941731	8.1526717802124	21.8920262195434	2.5217970980302e-45	9.34686660739362e-44	92.7103460026724
UBE2T	2.10440745707194	9.85086503707886	21.8371923595299	3.25688241629138e-45	1.20259276467183e-43	92.4548228778086
WDR43	1.55753306901042	7.58925768579102	21.8366278340496	3.26547701346649e-45	1.20259276467183e-43	92.452190267486
RIMKLA	-2.17334342480469	9.13474462719727	-21.8099459695629	3.69881383259184e-45	1.3578416257416e-43	92.3277166280827
NPRL3	1.64486374886067	9.03786448083496	21.8044917394632	3.79428001333351e-45	1.38846557821255e-43	92.3022611532307
RAP1A	-1.15703876106771	12.0657198571777	-21.7936941288348	3.9906438993038e-45	1.45570101985047e-43	92.2518566037951
CCL15	-1.67464200040691	11.5674763230591	-21.7857706566	4.14121262689077e-45	1.50585987224511e-43	92.214859624666
NUP155	1.52717693652344	6.87571252368164	21.7817027580473	4.22072079130319e-45	1.52994492331295e-43	92.1958623883073
C6orf72	-1.46307741967773	10.2581228213501	-21.747398470642	4.95530375739974e-45	1.79058891572247e-43	92.0355779416033
EBPL	1.48621230623371	9.67109079742432	21.7097988910828	5.90908709795156e-45	2.12856396806524e-43	91.8597276489265
PHGR1	-1.55550628304036	16.5727613751221	-21.707583787852	5.970719437864e-45	2.14406488972768e-43	91.8493622749134
NONO	1.19390971874999	9.92288680737305	21.7052422639378	6.03657230046438e-45	2.16098040085257e-43	91.838404660131
GGT6	-2.04256835164388	9.48662886260986	-21.6976413755589	6.25541545447373e-45	2.23099313393033e-43	91.8028301080062
CAD	1.96703506160482	8.03324793572998	21.6966846625724	6.28352042235198e-45	2.23099313393033e-43	91.7983518781885
CKAP2	2.31203125402832	7.62623603189087	21.6964575016128	6.2902122714267e-45	2.23099313393033e-43	91.7972885550427
RNASEH2B	1.52883656306965	9.38183316070557	21.6921624901578	6.41809490436384e-45	2.2693674835154e-43	91.7771827197321
PPAT	2.02822813907877	6.79462310540772	21.6911888478159	6.44744646396913e-45	2.27277417095328e-43	91.7726245783085
F2RL1	-1.5785835139974	11.4030691015625	-21.6753370566448	6.94476163232969e-45	2.44061790658123e-43	91.6983971795197
ARMC10	1.15542715437825	9.21186576922607	21.6733335710949	7.0103034085814e-45	2.45616314257501e-43	91.6890134468323
FRZB	-2.21325643395996	8.64607579788208	-21.6538796154381	7.67997716517713e-45	2.68263929645445e-43	91.5978707812341
EPB41L4A	-2.06909506412761	7.89639732324219	-21.6152996479366	9.20446271991451e-45	3.20543328617688e-43	91.4169818355196
HEPACAM2	-3.55058903275554	9.88370115933228	-21.6130078529018	9.30405752932482e-45	3.23035756447371e-43	91.4062304914077
SLC26A3	-4.36047756201172	13.1928326085205	-21.6123239031425	9.33398945865635e-45	3.23101791261056e-43	91.4030217964626
URB2	2.20574211315918	6.28249843637085	21.6011886347678	9.83515673526183e-45	3.3943069367474e-43	91.3507733484318
SULT2B1	4.14926681762695	4.92852643145752	21.5927174924468	1.02344707716083e-44	3.52157446520385e-43	91.3110150062119
C14orf176	-2.53641133577474	9.79367233361816	-21.5844358391915	1.0640611981605e-44	3.65042661642742e-43	91.2721373231001
IARS	1.58142504410807	8.83581147058105	21.5616979470926	1.18410208355854e-44	4.0501913107357e-43	91.1653515979201
EPB41L3	-2.23979877473959	8.07652230688477	-21.5537271018281	1.22933237273304e-44	4.19245984038278e-43	91.1279021680135
TMEM30B	-1.66921921346029	11.0304187914429	-21.5499203533658	1.25154271663507e-44	4.25561442320133e-43	91.1100141093565
SHROOM3	-1.22045686482748	9.24770635443115	-21.5441848295775	1.2857708612317e-44	4.35914138747581e-43	91.0830592316596
CENPN	2.00139338053385	8.24514788330078	21.5350903548237	1.3419847677569e-44	4.53638076772253e-43	91.0403100540561
LOC100506253	-2.46683795638021	9.99386906396484	-21.5211957486813	1.43267928397085e-44	4.8287994462959e-43	90.9749775247191
KCTD9	-1.44876730216472	8.73232893414307	-21.5182665487653	1.4525723308716e-44	4.88157471077463e-43	90.9612013186994
AGXT2L2	-1.59972384578451	9.49693526226807	-21.503124230188	1.55992532008865e-44	5.22711022228542e-43	90.8899689156751
LOC100652777	-2.57587976456706	11.4127930831909	-21.4965337740834	1.60910784593295e-44	5.37628583770118e-43	90.8589571521226
LIPH	-1.78849455013022	11.1622002214355	-21.4934075079782	1.63298057307538e-44	5.44027949879766e-43	90.8442444255352
DHX34	1.66240793636067	8.24873538977051	21.4886048976039	1.67034990561125e-44	5.54873872103194e-43	90.8216401569455
CHTF18	2.19248459749349	8.97283324914551	21.4575441547484	1.9337027736439e-44	6.40511260683713e-43	90.6753778377021
UBE2I	1.14666859480793	11.4000814598999	21.4557521792122	1.95011191652073e-44	6.44095703774625e-43	90.6669358884397
BYSL	2.05231734090169	8.80614896380615	21.4052464598622	2.47492671065248e-44	8.1509943410546e-43	90.4288390052227
SETBP1	-2.12689169881185	7.34321253265381	-21.4023830180548	2.50861839845644e-44	8.23841717350639e-43	90.4153304137664
WASL	-1.31191673567709	12.2708977939453	-21.3915817718731	2.63991207008153e-44	8.64496205449709e-43	90.3643651161735
PRKACB	-1.77726831778973	8.8938532576294	-21.3870810972466	2.69663913195365e-44	8.80571084250134e-43	90.3431245168477
CDH3	5.24108792915852	5.78716851199341	21.3608523472872	3.05249019427462e-44	9.88970295170658e-43	90.2192892480353
LINC00341	-1.76408023189291	8.19700035238647	-21.3607244065468	3.05433699211204e-44	9.88970295170658e-43	90.2186849823687
SNRPC	1.07273804077147	12.2022053627319	21.3266294331189	3.58879579915564e-44	1.15876888450608e-42	90.0575806750186
TRPM6	-3.66647962329102	8.36124755560303	-21.3192878167018	3.71566722338153e-44	1.19638257217651e-42	90.0228712171183
HAUS6	1.69470635864258	7.21132611505127	21.3170923353883	3.75447661487031e-44	1.20551119608942e-42	90.0124901746619
FAM54A	2.13624589038086	6.66160810638428	21.2939130619586	4.1899418551486e-44	1.33787977186421e-42	89.9028530640585
MYLK	-2.67073856559245	10.8815479593506	-21.2903131436865	4.26198923848472e-44	1.35712568928214e-42	89.8858195197734
FNBP1	-1.4595295395101	9.00924916220093	-21.2792542882484	4.49120331453051e-44	1.42617357042957e-42	89.8334827163155
PDE4D	-1.67348064363606	7.52289975909424	-21.2784391389536	4.50858134320018e-44	1.42775871272166e-42	89.8296243565865
IL10RB	-1.78109145076498	10.085777368103	-21.2584114853095	4.95745409160647e-44	1.56560474832734e-42	89.7348008647413
CHEK2	1.50513832832845	7.46953005160522	21.2426405940438	5.34234542829045e-44	1.68254687846732e-42	89.6600960296442
C12orf45	1.47429979557292	8.84848818432617	21.2277885339976	5.73225653764923e-44	1.8004283681058e-42	89.5897149592498
C14orf43	-1.30971090836589	8.7741318782959	-21.161951765619	7.83585306063083e-44	2.45445321276879e-42	89.2773925652773
NUDT1	1.67333730875651	10.2837289239502	21.1583553356008	7.9709333822399e-44	2.48999862051706e-42	89.2603157644922
RETSAT	-1.95307866483561	10.0232997967224	-21.1429513696574	8.57650458269389e-44	2.67192887364088e-42	89.1871552143888
MDC1	1.45076566186523	8.07966373309326	21.1394651545798	8.71985621872819e-44	2.70926637825552e-42	89.1705934175744
PLA2G10	-2.50385816805014	11.507886298645	-21.1323212523947	9.02118257292849e-44	2.79535407306846e-42	89.1366504326858
ACBD6	1.27688082714844	10.0191423349609	21.1250890038556	9.3369041755688e-44	2.8854288051416e-42	89.1022811309516
C10orf54	-1.68581546573893	9.66759014202881	-21.1170824339096	9.6994058914715e-44	2.98943988532064e-42	89.0642243837109
PANK3	-1.22727561922201	9.66214712335205	-21.103968566234	1.03239758543477e-43	3.1734525246151e-42	89.001874215307
HSBP1L1	-1.62861525500489	9.55382585617065	-21.0975523457427	1.06441380596127e-43	3.26316434609457e-42	88.971360253015
ENTPD8	-3.26431049641928	12.4596146049805	-21.0945067258218	1.07995868894833e-43	3.30203814522744e-42	88.956874218219
TEX11	-4.11155169217937	7.17475031991577	-21.0728164154527	1.19747148486486e-43	3.65165444604161e-42	88.8536736623121
MDFI	3.50719842163086	7.59918375823975	21.0656885994248	1.23883051883817e-43	3.76780986560623e-42	88.8197471922067
SIDT2	-1.44728169677735	11.3158636463623	-21.0625769102606	1.25733360938229e-43	3.81402224088149e-42	88.8049343857207
SLC17A4	-3.26136871065267	9.81865184133911	-21.04614949284	1.35972299653519e-43	4.11378660920241e-42	88.7267134674394
PDE8A	-1.44535348942058	9.42046363928223	-21.043677757617	1.37583855670496e-43	4.15164686993142e-42	88.7149410856525
PDCD5	1.24755906762695	11.7012467632446	21.0376415121948	1.41600641743578e-43	4.26169868767161e-42	88.6861884113526
CENPP	1.44074539233398	6.74135863690186	21.0283617118181	1.48007065571388e-43	4.44291001260777e-42	88.6419766184002
TIAM1	-1.76690395788575	7.52402533755493	-21.0235364114107	1.5145264078641e-43	4.53453140349336e-42	88.6189831222703
NR2C2AP	1.5058861258138	8.71134663415527	21.0151992389449	1.57597091660089e-43	4.67955358044873e-42	88.5792479436686
HAUS5	1.86508150887044	7.78511390106201	21.014771544921	1.57918974334318e-43	4.67955358044873e-42	88.5772093062571
KLF9	-2.60579103776042	10.5142358850098	-21.0147551214882	1.57931347786539e-43	4.67955358044873e-42	88.577131022204
IQGAP3	2.45061418277995	8.76646232165527	21.0142480085498	1.58313887982037e-43	4.67955358044873e-42	88.574713797268
GALNT12	-1.80075937288412	9.60816840148926	-21.0142317318805	1.58326181692982e-43	4.67955358044873e-42	88.5746362117035
IFITM4P	2.38112177392578	11.6195304088135	21.0130789391925	1.5919932793182e-43	4.69332647844011e-42	88.5691411405026
KIF13B	-1.46488228914389	10.589646696106	-21.0083245483172	1.62851851771875e-43	4.78875840656735e-42	88.5464763882315
EZH2	1.74894835888671	8.21394925134277	20.9924974134788	1.75629159460157e-43	5.15134178396242e-42	88.4710059654336
PLS1	-1.67670178100586	11.796423602356	-20.9693272163033	1.96175434558557e-43	5.73937622882356e-42	88.3604636695034
WDR74	1.59625591658528	8.77761884210205	20.9615267748631	2.03623058448606e-43	5.94218479680272e-42	88.3232334160508
HSP90AB2P	1.27115775260416	10.5113195092773	20.9573907349338	2.07686698336507e-43	6.04546609021443e-42	88.303489642922
TMEM171	-2.61723211507162	10.5215467789307	-20.9538435409965	2.11236699628369e-43	6.13331344235821e-42	88.2865550591377
POLA1	1.52871877652995	8.39390630236816	20.952278327753	2.12822492398425e-43	6.14990813556463e-42	88.2790821019718
GPT	-2.4857418178711	8.42272910437012	-20.9522264276441	2.12875279438734e-43	6.14990813556463e-42	88.2788343046875
NOLC1	1.53739789469401	9.69052893786621	20.9472040955365	2.18046217046702e-43	6.28354685974333e-42	88.25485354891
KLK6	5.09778985058594	4.7840691965332	20.9355699415101	2.30515057492428e-43	6.62630191450179e-42	88.1992902560025
ACAT1	-1.45104362158204	10.0271268201904	-20.9273711215226	2.39730467982691e-43	6.87406244884696e-42	88.1601234203573
PLEKHB2	-1.12188921293132	10.2972497568665	-20.9253725013329	2.42032507054093e-43	6.92285039407575e-42	88.150574462066
ARHGAP44	-2.54001722363282	11.1657190585937	-20.9141624551239	2.55362574928787e-43	7.28605049803003e-42	88.097006019869
SF3B3	1.38655751017252	8.94465920599365	20.9023509504859	2.70207527772589e-43	7.68537263197821e-42	88.0405462522161
PAG1	-2.11496686572266	8.5628607713623	-20.901976921575	2.70691531932259e-43	7.68537263197821e-42	88.0387580813108
SYTL2	-1.94249606282553	10.4526491352539	-20.9007929333034	2.72229401493953e-43	7.69950430673698e-42	88.033097510852
TRPM2	3.01287839542643	6.41580712628174	20.9005659875883	2.72525180632315e-43	7.69950430673698e-42	88.0320124779912
C2	2.79241725016276	7.89634939538574	20.8933896828017	2.82046624359357e-43	7.94902552320368e-42	87.9976990349305
PYCR1	2.21462529410807	11.805353302124	20.8767955216154	3.05364626424892e-43	8.58521475317008e-42	87.9183292449445
PLAC9	-4.55712590486653	7.26992310076904	-20.8710541331778	3.13875969277083e-43	8.80303722106309e-42	87.8908601027901
PAICS	1.7947706965332	10.0669471018677	20.8520668899591	3.43759914953405e-43	9.6177683001648e-42	87.7999876945285
SIAE	-2.09855833443197	10.8862169931335	-20.8493552863139	3.48255111895468e-43	9.71994352256431e-42	87.7870063142425
TH1L	1.97060057779947	8.9914217121582	20.848561761794	3.49581732536288e-43	9.72616094953543e-42	87.7832072631841
NCOA1	-1.29673880045573	8.80612326831055	-20.8481873961709	3.50209362868578e-43	9.72616094953543e-42	87.7814149353731
FAM162A	-1.19348454573569	13.282500196167	-20.8477112947809	3.51009191897869e-43	9.72616094953543e-42	87.7791355077238
TIMM8A	1.51782147143554	8.63353918084717	20.8383771225207	3.6706654419752e-43	1.01467051677813e-41	87.7344405560799
ITM2C	-2.34289074251303	13.715439519043	-20.8359409835552	3.71377583221999e-43	1.02413143583732e-41	87.7227737425181
LGALS2	-3.93459552335613	13.7008632785034	-20.8289002922521	3.84125266058047e-43	1.05675702669478e-41	87.689051233623
TSPAN1	-2.61725748999023	15.2224816716919	-20.8021709487292	4.36658736155788e-43	1.19784664311682e-41	87.560969676223
ECE2	1.94957459375	9.5668025456543	20.8017750321058	4.37488884143473e-43	1.19784664311682e-41	87.5590718448856
FBL	1.22123255721027	14.0576744387817	20.7978706047428	4.45761061479374e-43	1.21760373357174e-41	87.5403548601806
RPF2	1.47094237833658	9.23447221673584	20.7964902571694	4.48723034412151e-43	1.22279678904701e-41	87.5337373091494
CAPN2	-1.42269886531576	13.7955686436157	-20.7928982001863	4.56524019196991e-43	1.2411208418122e-41	87.5165154285718
TRMT1	1.56190401733397	9.31586514276123	20.7831143530554	4.78470494373859e-43	1.2977245620347e-41	87.4695991334578
PTP4A3	2.97495652628581	5.98137912506103	20.7689465075915	5.12145178059286e-43	1.38579752757967e-41	87.401638850743
LXN	-1.82380906860352	11.3062079830933	-20.7679181822744	5.1468015735967e-43	1.38939535688171e-41	87.3967051932258
SPECC1L	-1.71310612670898	10.7934816546021	-20.7637297132058	5.25136389597665e-43	1.41431008478792e-41	87.3766085425472
RHEBL1	2.19250904874674	6.66000139117432	20.7616180859321	5.30488644925558e-43	1.42539454779881e-41	87.3664759228739
E2F1	2.917867994222	6.29456275262451	20.759547362425	5.35790487102251e-43	1.43629231275062e-41	87.3565390310436
XLOC_l2_005553	-2.73687723307292	7.97733242504883	-20.7567327434798	5.43082516522865e-43	1.4524622199441e-41	87.343031497565
CA1	-6.67973605240886	14.6159327070313	-20.7455334294831	5.73099452816523e-43	1.52919384088335e-41	87.2892753454413
TAMM41	1.1705459930013	9.02086251281738	20.7391796319891	5.90865211655919e-43	1.57295688100642e-41	87.2587703688113
CDC42SE2	-1.09834103645834	12.2894273405762	-20.7366156343784	5.9819023784339e-43	1.58878775843796e-41	87.2464590086973
SLC44A1	-1.15366558276368	11.3775268013306	-20.7358276530009	6.00459693911414e-43	1.59114917050963e-41	87.2426752487513
GNPTAB	-1.41312805037435	9.12276920697022	-20.726380102447	6.2835315734494e-43	1.66124468915485e-41	87.1973035038833
SMPDL3A	-3.26234538012696	11.2392685536499	-20.7154757107476	6.62171786721449e-43	1.74664855504305e-41	87.1449212389191
KRT24	-5.17788626790365	6.25879895068359	-20.7025405661218	7.0467017606604e-43	1.85450527842768e-41	87.0827641533499
CHMP1B	-1.63009690275066	9.77755620050049	-20.6811665881273	7.8099047381986e-43	2.05067817579078e-41	86.9800095828194
CFD	-3.81621081477864	12.8548878503418	-20.6768165174409	7.9751350035905e-43	2.08930411787245e-41	86.9590896951733
EEF1E1	1.68824815478515	8.43991943469238	20.6727173052315	8.13405236206591e-43	2.1261047976765e-41	86.9393740137322
TRAP1	1.99451615633137	8.52216707171631	20.6700394741873	8.23958141953667e-43	2.14881572450224e-41	86.9264934951995
FTSJ1	1.31535535359701	9.65652439349365	20.6685394594647	8.29929500634045e-43	2.15950278867012e-41	86.9192779424735
CKS1B	1.41464714200846	9.77210553338623	20.6672320110651	8.35169758940074e-43	2.1682436511942e-41	86.9129884629694
RHPN1	3.42154292154947	7.29056502636719	20.6660761904282	8.39829990351468e-43	2.1754427637711e-41	86.9074282082367
SIDT1	-1.79345996232097	8.24967828424072	-20.6601418847179	8.6417186686968e-43	2.23347737879076e-41	86.8788776417353
AURKA	1.97307157617187	8.33761024682617	20.6524008468745	8.96994271353197e-43	2.31312146887881e-41	86.8416279871709
UTP20	1.45915801855469	7.3568977578125	20.6518858464352	8.99221854600646e-43	2.3136898031209e-41	86.8391495501272
RBM47	-1.30328457918295	9.73918638800049	-20.6445449715542	9.3158552338266e-43	2.38966672921447e-41	86.8038179704582
MEX3A	3.05421759716797	5.50652452380371	20.6442529951045	9.32896701784082e-43	2.38966672921447e-41	86.8024125485522
TIMELESS	1.56961928027343	9.51891760742187	20.6422176217136	9.42088647972757e-43	2.4078616064705e-41	86.79261502536
FAM46C	-2.53782996020508	10.5776667628784	-20.6324812775042	9.87334576458023e-43	2.51792160682116e-41	86.7457406538202
PHLPP2	-2.52784700276693	8.9723842869873	-20.6264445292671	1.01647895909691e-42	2.58652383256293e-41	86.7166714719084
SLC9A1	-1.63728616267904	7.90724478582764	-20.625922596535	1.01903902731581e-42	2.58732662287872e-41	86.71415795515
CILP	-4.2157724259847	6.99156580044556	-20.6216658098868	1.04016198681208e-42	2.63515323560061e-41	86.6936568883362
EBNA1BP2	1.26188170922851	11.8306061997681	20.6031122028811	1.13749191691639e-42	2.87540993997703e-41	86.6042742125306
FCHO2	-1.00750655379232	8.32117998760986	-20.6006866148204	1.15087559151455e-42	2.90287591759042e-41	86.5925856266939
GPT2	2.67515783487955	7.24235548980713	20.5991893510801	1.15921596191932e-42	2.91752890677817e-41	86.5853701396039
RIOK3	-1.78626365299479	12.2375940351562	-20.5918942758338	1.200730154477e-42	3.0154284293369e-41	86.550210260269
RANBP1	1.67188829191081	11.4456588230591	20.5881273192284	1.22274877534185e-42	3.06404894203599e-41	86.5320521170394
FRMD3	-2.56710313753255	9.52407711828613	-20.5852567578624	1.23979995866637e-42	3.10003777083455e-41	86.5182137263787
DBF4	1.58416751310221	6.54576730023193	20.5809859128641	1.26561232916488e-42	3.15773015547263e-41	86.4976229193215
PPIL1	1.70745658902995	9.79467704724121	20.5788209793029	1.27890255353858e-42	3.18399778285943e-41	86.487184351772
BRIX1	1.50297524251301	9.03098707617188	20.5767918543418	1.29148643511024e-42	3.20839744343012e-41	86.4774000668773
LRRC36	2.81543591381836	5.7413203571167	20.5678270136283	1.34859011071344e-42	3.3430533776761e-41	86.4341660401978
SLC36A1	-2.43856481616212	10.6589672490845	-20.5663308294197	1.35836464603246e-42	3.36005778429531e-41	86.4269495182529
RAD54L	2.35712282242838	7.70663193371582	20.5655907069145	1.36322614930439e-42	3.36486248887188e-41	86.4233795919154
LOC401022	-2.71078623502604	8.13390914941406	-20.5641420632486	1.37279226918094e-42	3.3812342920617e-41	86.4163919648299
CXCL12	-2.85579613712566	7.9507227276001	-20.5555851178415	1.43069094300025e-42	3.51632718549337e-41	86.3751115491731
GEMIN6	1.21108413757324	9.79151979647827	20.5494147359943	1.47395933896514e-42	3.61496368090451e-41	86.3453386274983
C17orf76	-1.40174744571941	9.54721014581299	-20.5356925030315	1.57495932836716e-42	3.85447052613339e-41	86.2791096880317
CTSD	-1.48599383479818	12.0735155350342	-20.5273866345437	1.63944475209718e-42	4.00378806301359e-41	86.2390106613022
SLC26A2	-4.36135547298178	14.2903575559082	-20.5247883467487	1.66015756891978e-42	4.04580048561064e-41	86.2264648635405
RFC4	1.72600371834309	9.19630726226807	20.520310866808	1.69647005003485e-42	4.12557178623453e-41	86.2048434009834
IFITM2	1.95800467423502	12.407101260437	20.5113328819449	1.77170575968018e-42	4.29946364038599e-41	86.1614816223982
CCDC85B	1.81790723583984	9.12606475622559	20.5086714420962	1.79464679301394e-42	4.34598604686379e-41	86.1486254614728
EXOSC3	1.09762688765462	8.27723333914185	20.4708371428822	2.15501203242167e-42	5.20771985277246e-41	85.9657685413638
SMOX	3.08154759692383	5.63485572613525	20.4675221461271	2.18986106018183e-42	5.28086369052636e-41	85.9497381728368
AHNAK	-1.61815054622396	10.4259819550781	-20.4648082766578	2.21881212072961e-42	5.33950883416496e-41	85.9366136436536
HSP90AB1	1.27712944026692	10.5463886116943	20.4639306383569	2.22825670681413e-42	5.34910952506787e-41	85.9323691017577
DSN1	1.60109373103841	7.941121737854	20.463576175556	2.23208265945836e-42	5.34910952506787e-41	85.9306547775928
CHEK1	2.27291112451172	6.57532917834473	20.4611638588333	2.25829641034151e-42	5.40070180954492e-41	85.9189874233151
CRNDE	3.71160196166992	5.22531464910889	20.4600608267478	2.27038555508496e-42	5.41837148933008e-41	85.9136522780742
ABP1	-2.3140778754069	11.5949303552856	-20.4573862223471	2.29996986603232e-42	5.47763484416417e-41	85.9007151107732
METTL1	1.9169365715332	7.24817658184814	20.4556413219757	2.31947914444235e-42	5.51270847381175e-41	85.8922744689497
CCT7	1.21132489046224	11.9409732862549	20.4547816671456	2.32915181170227e-42	5.52430718796132e-41	85.8881159010885
NUF2	2.28357850390625	6.30652640332031	20.4496741953585	2.38746215611583e-42	5.6509807543218e-41	85.8634066444858
PACSIN2	-1.38296561840821	9.42170646014404	-20.4484130047995	2.40208531715924e-42	5.67394210059315e-41	85.8573046653403
ADH1A	-3.68911939705404	7.49044901873779	-20.443615577074	2.45853773061516e-42	5.78358457567367e-41	85.8340915737894
C5orf30	-1.60359320914714	10.6379975870361	-20.4304437761199	2.62048794259588e-42	6.15200906604944e-41	85.7703427581615
TBRG4	1.30800123494466	10.3778838855591	20.4292685505416	2.63544873005278e-42	6.17455640473951e-41	85.7646538364703
SYNPO	-1.96815419978842	9.16259576922607	-20.4260850602826	2.6764078057414e-42	6.25779975188258e-41	85.7492426142457
FAM107A	-3.61712065795899	6.88453893536377	-20.421513438922	2.7363487666122e-42	6.38499842767992e-41	85.7271092210735
NDUFAF2	1.25935009798176	9.75497952636719	20.4011179751539	3.02064401822773e-42	7.03413406022446e-41	85.6283327354249
LOC282997	-1.9425029251709	8.49039074490356	-20.3970239881018	3.08119553610744e-42	7.1606735775626e-41	85.6084989352448
RAN	1.38481695328776	12.3209156107178	20.3881876189165	3.21608102906618e-42	7.45910785151828e-41	85.5656828500475
C15orf48	-2.10086004711915	15.0507305394897	-20.3835588787862	3.28909138292641e-42	7.60364888658681e-41	85.5432506136814
FANCI	1.81959537524414	8.81700261968994	20.3834020325945	3.29159433886251e-42	7.60364888658681e-41	85.5424904432054
DDX55	1.24639575830078	7.61903863317871	20.3816416282788	3.31981862663265e-42	7.6535098618389e-41	85.5339582563075
KAT2A	1.7877667195638	9.42336846765137	20.3660643712742	3.58041288118794e-42	8.23780823981106e-41	85.4584424921989
DIAPH3	2.85699218725586	6.74720246575928	20.3627224681135	3.63894666328312e-42	8.35580441985349e-41	85.4422375241081
TESC	3.84700866943359	9.78233425598144	20.361059813717	3.66842565864764e-42	8.40674802529451e-41	85.4341747445542
PITX2	4.50722442057291	5.16582189892578	20.3487984832067	3.89336450383097e-42	8.90452631659912e-41	85.3747045120285
LOC100505730	2.29374010148111	7.60787233209228	20.3329200082046	4.20539826411593e-42	9.59913381989393e-41	85.2976619125689
MFSD7	-1.94466665136719	8.55205337817383	-20.3140848907976	4.60830925723409e-42	1.04773137688634e-40	85.2062320827785
MID1IP1	1.40773808528645	10.4011253615723	20.2864468488974	5.27086513241004e-42	1.19365937880728e-40	85.0719892609202
DDX56	1.35340776513672	11.5343845235596	20.2853828736844	5.29820371746999e-42	1.19749792649562e-40	85.0668194050777
RPUSD1	1.21698030314127	10.5442813380737	20.2825389194327	5.37198027411729e-42	1.21179680273483e-40	85.0529999240104
ACD	1.35203138391113	9.66559259707642	20.2733287603545	5.6180696776421e-42	1.26483377293321e-40	85.0082384116235
MYOC	-5.54549585587565	5.77608397955322	-20.2718914297206	5.65748376665153e-42	1.27122447130979e-40	85.0012519899603
VILL	-1.89861265653483	11.4338756878357	-20.2645871592054	5.86211718580138e-42	1.31464250585083e-40	84.9657441200484
RILP	-1.92957264526367	8.642079784729	-20.2638953377071	5.88188062937012e-42	1.3165133595097e-40	84.9623806524791
ASAP3	-1.72757762190755	7.91499020837402	-20.2624081813946	5.92459167118189e-42	1.32350325956809e-40	84.9551502547681
DDX21	1.83759141247558	9.68063237960815	20.2619587161412	5.93756154280827e-42	1.32383504649808e-40	84.9529649465903
HGD	-2.08303017985026	9.98143997546387	-20.2482762230342	6.34634873656101e-42	1.41224636846214e-40	84.8864281225468
FAM46A	-2.06109447078451	9.35465416998291	-20.2478513621758	6.35948539805524e-42	1.41244293224244e-40	84.8843616784499
CCT4	1.24366094189452	12.6417886968994	20.2301166671487	6.93293557309233e-42	1.53684516059683e-40	84.7980829436247
CHP	-1.45048470743816	14.1307760733032	-20.2288621284466	6.97541736815856e-42	1.5432943570588e-40	84.7919781371586
LOC646808	1.41171422851562	9.82594304223633	20.2253040389981	7.09733218587206e-42	1.56725954227102e-40	84.7746627576452
LOC100288911	-1.40979122111003	8.12878472467041	-20.2203178434254	7.27179301596618e-42	1.6027143039205e-40	84.750394815276
CPT2	-1.44210902811687	10.5416083453064	-20.2068230416599	7.76589298149582e-42	1.70834825186455e-40	84.6846994048058
TMEM185B	1.08901408479818	7.85500090344238	20.2052523232342	7.82555405933455e-42	1.71819355508475e-40	84.6770513263034
LAS1L	1.40484470890299	10.5179621040649	20.2028750085394	7.91672999590685e-42	1.73490773123229e-40	84.665475204934
GRPEL2	1.2249371586914	7.85597472839356	20.2018871237877	7.95493123371205e-42	1.73997139148005e-40	84.6606645769941
DDX39A	1.25618054345703	11.6776894107666	20.1966553604172	8.16035332783618e-42	1.78152259109787e-40	84.6351857832929
TMEM97	2.34014949039713	8.70522265100098	20.1876437590576	8.52677271845526e-42	1.85799828214809e-40	84.591290937146
SERINC1	-1.12122323828125	10.1860849262695	-20.1792013475662	8.88504420025834e-42	1.93241329238449e-40	84.5501591992312
CSTF1	1.04124634993489	9.26865823046875	20.1570548514805	9.89847729204455e-42	2.1447321004774e-40	84.442217562427
MYH11	-3.36408630883789	11.337579140564	-20.1348644161048	1.10305519408988e-41	2.38553794038912e-40	84.3339991701743
TGS1	1.25703225541178	8.80148616903687	20.1299455300797	1.12986262853005e-41	2.43893755038688e-40	84.3100022450444
IMMP2L	1.60302215608723	7.93236751306152	20.1265054481597	1.1489990236173e-41	2.47560967200683e-40	84.2932178779716
RNASEL	-1.68486822672526	8.87802083459473	-20.1214128161388	1.17792807781076e-41	2.53320465539638e-40	84.2683678542373
VIPR1	-2.46914229671225	9.45463304797363	-20.1186892210886	1.19369903286275e-41	2.56234054968508e-40	84.2550764363401
TDP2	-2.00744807202149	13.3942312805786	-20.1070524530912	1.26350835692575e-41	2.70714885321248e-40	84.1982772035502
SLC30A10	-3.84343855818685	7.17492749798584	-20.099058464557	1.31382897742929e-41	2.80974148846521e-40	84.1592484434081
AHCY	2.37695487565104	9.00243017285156	20.0802895489936	1.44003924336484e-41	3.07395043671602e-40	84.0675816802574
DTYMK	1.67760952970377	11.2472465250854	20.0646350022591	1.5545855017701e-41	3.31233032881774e-40	83.991091094132
SLC6A6	1.80247190291341	6.47744935845947	20.0633946089377	1.56404409721194e-41	3.32633511228082e-40	83.9850290027516
XLOC_l2_008546	-2.83378159366862	8.46494936004639	-20.0629037333055	1.56780321841417e-41	3.328189263105e-40	83.9826299249892
PNPT1	1.37027748885091	8.87928699249268	20.0552612149227	1.62751501993936e-41	3.44859662405165e-40	83.9452743570046
ACO2	-1.00453163419598	12.6110204568481	-20.030241343328	1.83946733535865e-41	3.89055779351911e-40	83.8229286828779
C19orf28	2.19987901733398	6.42213905828857	20.0210153001602	1.92444737030146e-41	4.06283971382142e-40	83.777793771546
PPP1CB	-1.1037707253418	10.5189731907349	-20.0052323609718	2.07907597724243e-41	4.38126303284708e-40	83.7005566095222
TRAIP	1.85221362915039	8.24040437969971	20.0012876969571	2.11963606386006e-41	4.45858483724724e-40	83.6812476049631
POP1	1.87628881119791	8.05986258569336	19.9858722856057	2.28591760435739e-41	4.79959421228189e-40	83.6057706575096
TP53I3	-1.46280123982747	11.7093003168335	-19.9845385597754	2.30090636506977e-41	4.8222813945744e-40	83.5992390459656
NOB1	1.32724506095377	8.88512223504639	19.9755513707701	2.40451565955189e-41	5.0302816710807e-40	83.5552204758745
CHAF1B	2.180550081014	7.47341748574829	19.9550572346525	2.65867146677549e-41	5.55190326042049e-40	83.4548032822954
MMRN1	-3.99096035001627	6.91076605841064	-19.9526573893925	2.6901472045282e-41	5.60747320553283e-40	83.4430410192199
TCF7	2.29480332560221	7.03070670184326	19.9414749898828	2.84182499453152e-41	5.9129452548673e-40	83.3882235124469
SNRPF	1.42618828621418	11.9128323004761	19.9321783758408	2.97444985552737e-41	6.17774477201152e-40	83.3426382365357
FBLIM1	-1.3996682529297	8.85655367797852	-19.9256905333193	3.07067481331716e-41	6.36612744120628e-40	83.3108190480187
CD164	-1.20136138452148	11.7712132346802	-19.9083688072731	3.34319706883286e-41	6.91867730923454e-40	83.2258395416124
NDN	-2.36859136311849	8.25735379406738	-19.9040176877337	3.4153932034842e-41	7.05541889902551e-40	83.2044871654397
GNB1L	1.94058299027506	8.29205493966675	19.8717632040585	4.00180208273258e-41	8.2520165666652e-40	83.0461286038128
WDR77	1.67978941031901	8.17771327575684	19.8702989790391	4.03070379427252e-41	8.29677189938917e-40	83.0389366119568
COL4A1	2.40731470328775	7.39242148400879	19.8562464392452	4.31897772689711e-41	8.85851534838844e-40	82.9698993505699
RNF138	-1.3184726994629	9.35112432391357	-19.8522630151271	4.40440204397189e-41	9.01768070352824e-40	82.950325024822
CASP7	-1.6970226887614	11.795416158905	-19.8481986080581	4.49331403186483e-41	9.18340972434502e-40	82.9303506700982
ZMIZ1	-1.07770743172201	10.1032241377563	-19.8402446093692	4.67256875779463e-41	9.53286726922101e-40	82.8912549953624
IFITM1	2.51275237882487	12.4935054822388	19.8383279796086	4.71682698029968e-41	9.60615982365979e-40	82.8818331283936
FAM82A1	-1.59283854003906	7.87514676367188	-19.8306690013281	4.89793292524995e-41	9.95740261540674e-40	82.8441780587696
TMC4	-1.60008856803386	12.2171495632324	-19.829375564059	4.92920059776409e-41	1.00033266356385e-39	82.8378181871089
ABCE1	1.34822263842773	8.31444196282959	19.8202651326261	5.15519569472761e-41	1.04435748283172e-39	82.7930158728244
CALCOCO2	-1.31693355834961	8.44150599493408	-19.8099690405001	5.42316756859257e-41	1.0967167116345e-39	82.7423701156551
METTL7A	-2.56118026472982	12.585188805481	-19.8085969779265	5.45991954906364e-41	1.10221528269801e-39	82.7356200161211
KIAA1522	-1.01449180721029	12.5096523217163	-19.7755041997368	6.42634314867482e-41	1.2934130082705e-39	82.5727417156254
SLC25A23	-1.87578026993815	11.273801395813	-19.7754052869781	6.42947561151208e-41	1.2934130082705e-39	82.5722546709256
CLDN8	-5.00323279541017	8.6124863314209	-19.7653910476429	6.75469233376174e-41	1.35646931239149e-39	82.5229382802463
ACCN2	2.69257192960612	5.89930061260986	19.7551089750009	7.10582450534666e-41	1.42450154909793e-39	82.4722896179608
SSPN	-2.299993109375	9.61002628369141	-19.7541398758109	7.1398509553487e-41	1.42883788129001e-39	82.4675152188383
BZW2	1.01246994238281	11.167579467041	19.7330711451381	7.92147948270131e-41	1.58251116112821e-39	82.3636876733618
EPAS1	-1.44338758715821	12.6596755177612	-19.7272466738573	8.15235885596243e-41	1.62581731025396e-39	82.3349744690847
FXYD3	-2.03278260335287	12.8892943323975	-19.7237005609933	8.29622583441971e-41	1.65165103960891e-39	82.3174908922545
LGALSL	-1.19063145515951	10.7863084314575	-19.7190039251951	8.49070622288093e-41	1.68745466605428e-39	82.2943323689896
RELL1	-2.18201477368164	10.2386048168335	-19.7166719851917	8.58896429745114e-41	1.70404460338587e-39	82.2828328206985
OVGP1	2.02120842618815	6.22134319866943	19.6850092312954	1.00419652019157e-40	1.98548426899626e-39	82.1266250071442
RRP9	1.80164120410156	9.01082336791992	19.6712611272247	1.07475321824306e-40	2.12134937443284e-39	82.0587591347629
NOP2	1.88434207617187	7.72538095288086	19.670472019525	1.07895101066115e-40	2.12599458117797e-39	82.0548630682289
CPSF4	1.01719744514973	8.82921940490723	19.6574219987194	1.1508124190232e-40	2.26372265427993e-39	81.9904196125933
SORD	1.91914335538737	9.33741586236572	19.655052548742	1.16436709643116e-40	2.28648373433764e-39	81.9787164960266
CCNDBP1	-1.39757502571615	10.1176950058594	-19.645644532216	1.2197890664689e-40	2.39124295394338e-39	81.9322416439914
GPATCH4	1.33387399674478	9.1011441328125	19.6363768696041	1.27697686286774e-40	2.4948664912333e-39	81.8864491045145
SCP2	-1.36598097766114	11.0690071919861	-19.6227944083374	1.36569592479646e-40	2.66368475890504e-39	81.8193169019026
SOX4	1.61188703263346	6.57137935125732	19.6207619165754	1.37949477031293e-40	2.68605341510086e-39	81.8092691569896
BRP44L	-1.38459652294922	10.1199633707275	-19.6135719341004	1.42944304885485e-40	2.77861551840638e-39	81.7737208238438
VAPA	-1.37571107531739	10.4124923677673	-19.6113547429174	1.44520945682914e-40	2.80453357051675e-39	81.762757375305
CCT2	1.41920257910156	12.5909973452148	19.6088798129458	1.46301520096335e-40	2.8343153313453e-39	81.7505187341024
SLC44A4	-1.65623817789714	11.6947421395264	-19.607081349529	1.47609233719192e-40	2.854851740069e-39	81.7416247612327
BRAT1	1.26605753141275	10.7122318792725	19.6043985545927	1.49581838964515e-40	2.88332752131097e-39	81.7283567223399
NHP2	1.38700423413086	12.7571984135132	19.5945898577865	1.57022245840957e-40	3.02169520502289e-39	81.6798389970774
TTF2	1.35805346769206	8.27352183795166	19.5905581768433	1.60187347288378e-40	3.07746592032189e-39	81.6598931415307
ATIC	1.15995304654947	9.63575004516601	19.5892556859188	1.61223521934671e-40	3.09221886412804e-39	81.6534489113672
IER5L	1.28210975557454	7.63152196212769	19.5883364796339	1.61958833531635e-40	3.10116191714145e-39	81.6489008978822
HSPE1	1.38423648111979	13.181288239502	19.586873673013	1.6313595095007e-40	3.11852090647008e-39	81.6416630576386
CKS2	2.05154541666666	11.1030079147949	19.5862381138676	1.6365006028266e-40	3.1231692795997e-39	81.6385182811862
ENC1	1.99986828417968	6.39234187329102	19.5819693052009	1.67145597832061e-40	3.18446376996237e-39	81.6173946822792
PFKM	1.2227016064453	9.89807464892578	19.5816448419915	1.67414335438292e-40	3.18446376996237e-39	81.6157890268273
PTCD1	1.28397817089843	10.1840644902344	19.5810356200891	1.679200991485e-40	3.1888220475861e-39	81.6127741635207
NOP14	1.41044402596028	9.7259249319458	19.5803464946058	1.68494048648049e-40	3.19445871507576e-39	81.609363823474
SYNJ2BP	-1.10386889534505	9.28704250256348	-19.5692280861726	1.78031566325476e-40	3.36973705260059e-39	81.554332749112
RRP15	1.59734093436685	6.94367705618286	19.5347700832763	2.11178294159749e-40	3.99057737176956e-39	81.3836812529702
KCTD1	-1.61428371443686	8.38458750823975	-19.5281899775225	2.18180950271811e-40	4.1161568147024e-39	81.3510764176832
C2CD4A	4.74625911653646	4.53945264624023	19.5125699998082	2.35753179920637e-40	4.43226234394259e-39	81.2736563675197
MYO1A	-1.71848035343425	13.0127446134644	-19.5123187239834	2.36047193643897e-40	4.43226234394259e-39	81.2724106708534
APOBR	-2.19199082478842	10.660883624939	-19.5122821921957	2.36089969565433e-40	4.43226234394259e-39	81.2722295643171
KIF2C	2.29116807364908	9.04928021087646	19.5044525808785	2.45439994935952e-40	4.60030377500279e-39	81.2334103012579
ACTL6A	1.08317407958984	10.2094551915283	19.4891527274488	2.64799063663018e-40	4.9550954656552e-39	81.1575309938125
POLR1C	1.44274169482422	8.59722005163574	19.4691530750435	2.92438810330405e-40	5.45673548488169e-39	81.0582981727258
VARS	1.59777575895182	10.0306694412842	19.4690742093179	2.9255335557013e-40	5.45673548488169e-39	81.0579067616661
SLC35D3	4.95043058870443	4.5213968560791	19.4685911489074	2.93255941269224e-40	5.46100361067907e-39	81.0555093127256
CCL21	-3.74376743754069	8.58379025064087	-19.4569251908864	3.10748284256858e-40	5.77741205262709e-39	80.9976016520711
KIAA1370	-1.52827270336915	9.18222298651123	-19.4537490061284	3.15689867916834e-40	5.85983431155771e-39	80.9818326558396
TBC1D10A	-1.29342413916017	9.33873705651856	-19.4518280514575	3.18716788051876e-40	5.90650870719289e-39	80.9722949527344
TST	-1.47551533585612	15.7412959962769	-19.4314292538424	3.52716787174432e-40	6.51565129128153e-39	80.8709841993849
LRRN2	-3.76851693001303	9.75747410839844	-19.4293428060716	3.56393712522136e-40	6.57304051878826e-39	80.860618856598
RCAN2	-2.30975026350912	8.80802748791504	-19.4241339004717	3.65742362061722e-40	6.73468403751673e-39	80.8347389179415
TMEM59	-1.54711521337891	13.7711900145264	-19.4167033175282	3.79506606752091e-40	6.97698988202768e-39	80.7978148126489
YTHDF1	1.17322186735026	11.8210634642334	19.4047085612833	4.02832739669259e-40	7.39403342383368e-39	80.7381955503662
MYBBP1A	1.76985555395507	6.86545377813721	19.4006874797853	4.10970808987353e-40	7.53141576342959e-39	80.7182048904419
SNRPG	1.0600124148763	12.594849255249	19.3934010036933	4.26140939745922e-40	7.79702636897023e-39	80.6819751950015
N6AMT2	1.63157823087565	7.94311069207764	19.3863654991999	4.41322524550223e-40	8.06200434309099e-39	80.646986961538
TOMM6	1.00318567667642	11.7432334590454	19.3814013357062	4.52360484041364e-40	8.25056851193799e-39	80.6222959117992
MTERFD1	1.33751187524414	8.36755862896728	19.3756731317041	4.65442628687328e-40	8.47576173914507e-39	80.5938007331698
MIR22HG	-1.72052131131999	8.8956621335144	-19.3583206812776	5.07439694630125e-40	9.22595798107484e-39	80.5074547830463
BCL2L12	1.40742946687826	9.2293776708374	19.3558272122877	5.13779776071225e-40	9.32651886420947e-39	80.4950441088073
TFDP1	1.40457308846028	8.60452355352783	19.3520699306427	5.23484030203491e-40	9.48773650338938e-39	80.4763415998363
WDR75	1.18745765258789	8.26185686138916	19.3517395678212	5.24346048226561e-40	9.48844097002758e-39	80.4746970766985
MSH2	1.24825831437174	8.25260861724854	19.3451845813121	5.41748130194304e-40	9.78797914851057e-39	80.442063937142
MARCKS	-1.38203496769207	13.1874111586304	-19.3289467980573	5.87397861135379e-40	1.05961426374139e-38	80.3612027083586
NOP56	1.62174104280598	10.058454932251	19.3273641929975	5.92048847650893e-40	1.06633547919872e-38	80.3533198258735
SNRPE	1.32103243684895	9.97353153491211	19.3258464576153	5.9654396095907e-40	1.0727554193409e-38	80.3457597567607
KPNA2	1.76988181404622	11.8213649360962	19.3178545451392	6.20785912400658e-40	1.11461046919663e-38	80.3059459969295
CTU1	1.1995597027181	7.95571580377197	19.3123451300456	6.38071945045326e-40	1.14386552263413e-38	80.2784946998359
CCL5	-2.54829007828777	9.7452049083252	-19.3109419237188	6.42551343582456e-40	1.15010703998059e-38	80.2715024449118
ARHGEF19	1.64649015462239	7.38324137915039	19.3039693035099	6.65282927547601e-40	1.1889482644715e-38	80.2367537751235
SLC7A1	1.87694847566731	7.55932983270264	19.2907765318806	7.10528293106596e-40	1.26784204870584e-38	80.170989500126
ANTXR2	-1.39095542529298	9.66709317224121	-19.2831596889192	7.38046115262748e-40	1.31490843441015e-38	80.1330104281252
GLP2R	-3.05276771427409	6.75892066021729	-19.2808085333583	7.46754748512963e-40	1.32837067686866e-38	80.1212856143165
SIPA1L2	-1.42598102726238	9.51936241595459	-19.2780382399395	7.57148500893722e-40	1.34478440212665e-38	80.1074697283327
MYBL2	2.78836881022135	6.49121752124023	19.2640682300819	8.11819985219672e-40	1.43966907225033e-38	80.037784226549
NOC3L	1.6065727738444	7.32424789373779	19.247738070968	8.80779923150606e-40	1.5595622387338e-38	79.9562942952189
TMEM127	-1.49027169124349	11.0441760089111	-19.2436682514014	8.98864077537805e-40	1.58914205855495e-38	79.9359800059653
RAB27A	-1.56459588761393	7.99765872113037	-19.2322938055935	9.51410040907189e-40	1.67946455459987e-38	79.8791938850779
INSL5	-5.49974937312826	11.1728313618774	-19.2191933787935	1.01576743008397e-39	1.79032892455321e-38	79.8137705285066
POLD4	-1.40274058634441	13.6422327498169	-19.218798736782	1.01777261557671e-39	1.79112441828286e-38	79.8117993527892
RRP12	2.238340046875	6.90467235546875	19.2121467980996	1.0521763244702e-39	1.8481786084608e-38	79.7785709678719
UBE2S	2.2566256689453	9.97679388696289	19.2119143835475	1.05339927627201e-39	1.8481786084608e-38	79.7774098872355
BIRC5	2.25186432983398	10.6703604310913	19.2063501981572	1.08310807454572e-39	1.89741440353928e-38	79.7496106609689
BTNL3	-3.01612210058594	12.5402608874512	-19.2046948415223	1.092107986737e-39	1.91027750578413e-38	79.7413395736433
CADPS	3.35475037939452	5.3887479329834	19.1960427274566	1.140385869484e-39	1.99170119962758e-38	79.6981031017329
TSEN2	1.53873507674153	7.68953144830322	19.1933696019507	1.15573106876074e-39	2.0154481134047e-38	79.684742994082
NUP107	1.31675479777017	9.38830273321533	19.1857387358983	1.20068792111355e-39	2.09068423967914e-38	79.6465994204572
UBAP2L	1.22362535782877	6.93198138470459	19.1843800296105	1.20887509160357e-39	2.10176518565828e-38	79.6398070274809
SCNN1B	-3.77912257657878	8.33812015118408	-19.1785297739996	1.24477284970563e-39	2.16091816845736e-38	79.6105579692429
FAM151A	-3.77159412052409	7.51068892144775	-19.1765670902425	1.25705454490094e-39	2.17895755474784e-38	79.6007443199907
CTSG	-4.37175022347006	8.74994343981934	-19.1679221879676	1.31261712519838e-39	2.27185249281708e-38	79.5575129619485
RRP1B	1.35418608516438	7.28352420504761	19.1647688865313	1.33349284777886e-39	2.3045235466787e-38	79.5417415916008
CITED2	-1.70785256844075	9.58820249615479	-19.16015172999	1.36466323151853e-39	2.35486123798115e-38	79.5186464067117
NOC4L	1.2686693305664	9.54747094299316	19.1568477239065	1.38741710441192e-39	2.39054663117432e-38	79.5021179839865
MXD1	-2.02888662849935	10.9542542377319	-19.1549913155636	1.40036864345988e-39	2.40926109748688e-38	79.492830617781
NFE2L1	-1.1268216570638	11.6670442628174	-19.1545767773574	1.40327729460483e-39	2.41066726898805e-38	79.4907566779269
NPTN	-1.05176696337891	9.60182281506348	-19.1515175798026	1.42493106673556e-39	2.4442232747412e-38	79.4754507984227
PPP2R3B	1.6856181969401	6.30081549462891	19.1461565506525	1.46369092140869e-39	2.50697849198781e-38	79.4486254479174
RASSF6	-1.52258283463542	8.66497962158203	-19.1447094927278	1.47433348102742e-39	2.52146024270075e-38	79.4413840782093
PFDN4	1.6107840419108	8.78377978912354	19.1244368411652	1.63187467229087e-39	2.78675842185138e-38	79.3399076469475
KIAA0513	-2.01498152351889	9.8856398760376	-19.1241094785039	1.63455285897164e-39	2.7872027818589e-38	79.3382685773942
C12orf11	1.18918757812499	7.56133125756836	19.1135759029423	1.72312819261041e-39	2.93389936133237e-38	79.2855208275307
LTV1	1.29033145263671	8.67752888244629	19.1082934297668	1.76934824481843e-39	3.00815298200916e-38	79.2590630958167
SLC44A2	-1.28402522062175	10.3733207562866	-19.1040682186849	1.80721298256202e-39	3.06800354197237e-38	79.2378982008496
ARHGAP42	-1.41496331795248	8.19810571405029	-19.0965498654997	1.87661500501062e-39	3.18113840628785e-38	79.2002317117519
GEMIN5	1.44029987593586	7.72463811550903	19.0911708115278	1.92790726326149e-39	3.2632873749802e-38	79.1732785713082
BRCA1	2.10551380533854	6.66916287841797	19.064594942275	2.20276847527217e-39	3.72306630710591e-38	79.0400593382173
CDCA3	2.05107353446451	8.07291293057251	19.0581269342821	2.27542306641606e-39	3.84023450755166e-38	79.0076229954763
SLC22A18AS	-2.23693174397787	10.923566616333	-19.0486822027908	2.38586377462834e-39	4.02073855703814e-38	78.960249165249
PPAN	1.57361820206705	6.41694393780518	19.0473266119349	2.40215135511102e-39	4.04227717815544e-38	78.953448726644
SRPX2	3.58975064379883	6.7909679319458	19.0425617706957	2.46029335860692e-39	4.13408185782244e-38	78.929543636252
PFDN2	1.14846560335286	10.82697650354	19.0396787890477	2.49615700688432e-39	4.18823898374899e-38	78.9150783880162
GPRIN2	-2.39081939119466	10.5098394293823	-19.0377118093547	2.52092687179557e-39	4.22365175162609e-38	78.9052085378896
SCIN	-2.79522738712566	8.73599591217041	-19.0301917291967	2.61792532595082e-39	4.37980046911976e-38	78.8674699790177
SLC22A5	-1.86484784651693	10.1832437484131	-19.0146416634747	2.83056366986658e-39	4.72868223515248e-38	78.7894111780308
MFAP5	-3.21923451546224	8.69349836853027	-18.9987261936248	3.06619178862688e-39	5.11490488386427e-38	78.7094862998436
NOP58	1.55477196663411	11.742946081665	18.9975693936219	3.08406775765385e-39	5.13729032405721e-38	78.7036757857726
ALKBH2	1.30947813972981	9.50883629290771	18.977057130073	3.41902262109007e-39	5.68702362962557e-38	78.6006160977376
CHGA	-4.95883506762696	13.6169527357788	-18.974282534677	3.46705443799145e-39	5.75860756581087e-38	78.5866716059104
PHLDB1	-1.3763009502767	8.06044488922119	-18.9534518978374	3.84999825048222e-39	6.38545752997245e-38	78.4819502963232
RAD1	1.25010454012044	6.59335872259522	18.9334951893189	4.2567077492081e-39	7.03975182569896e-38	78.381570791666
SOS2	-1.289099099528	8.63162245037842	-18.9287146643056	4.36038077482376e-39	7.20087524231999e-38	78.3575179011175
EHMT2	1.23469738395183	7.8191267376709	18.9148021542759	4.67676263248181e-39	7.71230942269211e-38	78.2875015366337
LSM7	1.12884052286783	12.8207984472046	18.9141692296884	4.69169233778427e-39	7.72587679680561e-38	78.284315684018
DYRK2	-1.38452935522461	10.0534859360962	-18.9092721987629	4.80883643037361e-39	7.90748324292676e-38	78.2596645538599
ADK	1.29761567805989	8.14672640332031	18.8986880794231	5.07216558654028e-39	8.32861149801279e-38	78.2063748318514
EIF2S2	1.39011794807943	8.71447083166504	18.8859456469521	5.40849504822998e-39	8.86823932019161e-38	78.1421994139544
LY6G6D	4.37553258410644	7.78021397329712	18.8620842836405	6.09977566319916e-39	9.98751620308192e-38	78.0219697044974
PYY2	-2.0168401936849	9.45622857250977	-18.8614944735359	6.1179436671093e-39	1.00030548440807e-37	78.0189969270141
PDRG1	1.52896361914062	9.6846589855957	18.8584089366494	6.2138780715198e-39	1.01455201884432e-37	78.0034443979805
TUBAL3	-2.65000600113933	8.99335303845215	-18.8564189055593	6.27655191995625e-39	1.02333541699202e-37	77.993413082874
KIAA0020	1.39656808333332	9.51708404956055	18.8385964517276	6.86695247538451e-39	1.11750232443131e-37	77.9035515669876
MED11	-1.12745862988282	9.33717600488281	-18.8384073569893	6.87350696644227e-39	1.11750232443131e-37	77.9025979278893
PDE5A	-2.28687677368164	10.0725358942261	-18.8312000985501	7.12807139648103e-39	1.15725745052446e-37	77.8662470351597
ZNF786	1.10664319999186	6.44428330618286	18.8169235204378	7.66064790937165e-39	1.24197311464595e-37	77.7942215196941
SPC25	2.47960264583333	7.64674636889648	18.8085258716497	7.99241262375739e-39	1.2921253900989e-37	77.7518432062299
WDR5	1.20086894514973	10.1967487952881	18.7970282186862	8.47019721489859e-39	1.36745046633244e-37	77.6938063786665
MALL	-2.29034662687175	13.5740129423218	-18.7949337420643	8.56027509175089e-39	1.38006001374283e-37	77.6832322620893
TUBB3	3.18720325195312	6.62561438842773	18.7909268682253	8.73529147948152e-39	1.40630872742994e-37	77.6630017206984
ETFDH	-1.4099807171631	10.4926527408752	-18.7845577211194	9.02092127622688e-39	1.45026721828546e-37	77.6308399708366
TMPRSS2	-1.83862021907553	11.9210271342773	-18.7769192048406	9.37588406833052e-39	1.50523420133212e-37	77.5922616137431
PTGER4	-1.54771309692383	10.9707564464722	-18.7750695122571	9.46393009499644e-39	1.51725621981953e-37	77.5829186219507
SCGB2A1	-2.82733552620443	8.57419617858887	-18.7629744524088	1.00605030835195e-38	1.61065859782957e-37	77.5218145169735
CD14	-2.27279538590496	12.178686055542	-18.7600074185164	1.02125323173596e-38	1.63273037478785e-37	77.5068222643575
POLR3E	1.16486548795573	8.3472818034668	18.7445984931077	1.10400117056864e-38	1.76257915417517e-37	77.4289439097813
CPNE5	-2.4033182228597	10.3953083063049	-18.743480186966	1.11026257740738e-38	1.7701240290145e-37	77.4232907004928
CAMK2N1	-1.58888942504882	13.0136180211792	-18.7382459932852	1.14004664750226e-38	1.81509913062964e-37	77.3968289418364
CLDN23	-3.0061193725586	11.3436370550537	-18.7353371155766	1.15694477202438e-38	1.83946239822414e-37	77.3821214479506
CEP41	1.46865769327799	6.30859854327393	18.7347798333311	1.16021072830977e-38	1.84211419631221e-37	77.3793036667097
GLTPD1	-1.23222357576498	10.8972906930542	-18.7258690359279	1.21370910425279e-38	1.92440506804978e-37	77.3342427389621
EXOSC2	1.66334218729655	6.59459799026489	18.7209452959252	1.24432642558906e-38	1.97024048183586e-37	77.3093396112326
SCLY	1.52881121293132	7.86298470932007	18.7106201478045	1.31107555461563e-38	2.0730820189375e-37	77.2571074536282
MRPL4	1.264275875	11.8775671994629	18.7094414269649	1.31892097032913e-38	2.08263041438136e-37	77.2511437623107
RNF219	1.40270800764973	7.94508220324707	18.7073659869917	1.33284967898806e-38	2.1017453145958e-37	77.2406427285761
FAM63A	-1.444027359375	10.5863537446289	-18.7041576777381	1.35467275993354e-38	2.13323946772594e-37	77.2244086812076
NOP16	1.7240689888509	10.0880011226196	18.6963488497388	1.40930136707029e-38	2.21623695200808e-37	77.1848905597261
PSMG1	1.47264028149413	11.6527646355591	18.6833472192888	1.50521419463495e-38	2.36354830981572e-37	77.1190761076708
GINS4	2.49155621565756	7.16400942224121	18.6831029885317	1.50707730347407e-38	2.36354830981572e-37	77.117839603114
KIAA1737	-1.4859923671875	9.74396313769531	-18.6745488166994	1.57381559637808e-38	2.46486037764268e-37	77.0745263212598
SLC25A32	1.38100747493489	8.8790386484375	18.6645589751288	1.65552429377459e-38	2.58931187711529e-37	77.0239319328785
GIMAP1	-1.50139147045899	7.408755628479	-18.662417516321	1.67358721328372e-38	2.6140162340815e-37	77.0130846919807
CCDC80	-3.24768159903972	8.068396612854	-18.652717534823	1.75791800682624e-38	2.74201906152721e-37	76.9639436129613
ZNFX1-AS1	1.65664821118164	12.3377041633911	18.6511236380244	1.77217813411802e-38	2.76052666918627e-37	76.9558676332261
POLR1D	1.2305484230957	8.78955172808838	18.6253469432074	2.01962507606292e-38	3.13871246104834e-37	76.8252172752616
ACADS	-1.91067631730144	8.49158114471436	-18.6252705008233	2.02040829886169e-38	3.13871246104834e-37	76.8248296985619
MAGI3	-1.08167870060221	9.24158046856689	-18.6019208833568	2.27451747229521e-38	3.52871640688383e-37	76.7064083368893
GLA	1.30696186132812	10.4556693342285	18.5995387539173	2.30218329998505e-38	3.5668369487806e-37	76.6943231073086
PPA1	1.28013155639648	12.3764057196655	18.5931342475256	2.37825308304736e-38	3.67974809238751e-37	76.6618276427365
ZFYVE1	-1.12996748087565	8.21944370098877	-18.5902171700616	2.41373313118914e-38	3.72963831142322e-37	76.647025129004
DTL	1.79465947835286	7.29124064807129	18.5842248565278	2.48829441371316e-38	3.83970143331614e-37	76.6166141624125
RAB4B	-1.42079207674154	8.56549252703857	-18.5819889832247	2.51670416112328e-38	3.87834877877915e-37	76.6052659520123
PLS3	1.72938396427409	8.45101727069092	18.5669450710571	2.71652140018704e-38	4.1751122906608e-37	76.5288939120055
GOLM1	-1.39416130029298	11.3711040587158	-18.5651940280811	2.74079180891642e-38	4.20680521722764e-37	76.520002695786
MEP1A	-2.99279392879232	11.5504350947876	-18.551359477541	2.94036927948039e-38	4.50713253784182e-37	76.4497418102531
GINS1	2.45496375138346	8.01910813006592	18.5334166900137	3.22112870090754e-38	4.93093632607718e-37	76.358580602618
NPM3	2.16293348380533	9.441788746521	18.5320364455635	3.24381070881622e-38	4.95907241916772e-37	76.3515663653341
TTC27	1.14103686832682	9.04498570568848	18.5305250920807	3.26883140996257e-38	4.99070459107795e-37	76.3438855716861
SIGMAR1	1.24993556111654	11.0739002979126	18.5297253074563	3.28215034826547e-38	5.00441098736191e-37	76.339820899116
CENPA	2.80387954915365	5.74884602709961	18.5233372190658	3.39050836024839e-38	5.16279919003741e-37	76.3073524002015
MSH5	1.62517313956705	6.61918086187744	18.5078312346838	3.66872215782105e-38	5.56438951489517e-37	76.2285192798502
MARS	1.06723911116536	9.7910398392334	18.4979418844802	3.85802931283356e-38	5.84382442694251e-37	76.1782255283757
C9orf140	2.57380757096354	8.61168842626953	18.4961016343245	3.89432487605196e-38	5.89106074097782e-37	76.1688653021455
CEP55	2.39885486889648	6.82079943841553	18.4954478072093	3.90730286430186e-38	5.90294628005341e-37	76.1655395808796
PQLC1	-1.30920597587078	9.32716027096558	-18.4891084104722	4.03541088596391e-38	6.08054657287661e-37	76.1332911545623
SUV39H2	1.6970606180013	6.80825221936035	18.484501393478	4.13115124498547e-38	6.21668151448401e-37	76.1098521388728
MAPK7	-1.26126502400716	9.44035195062256	-18.479308091109	4.2418151761171e-38	6.37488963951784e-37	76.0834270813815
KRT20	-2.51302556250001	13.5358188684082	-18.4665287270559	4.52698327788745e-38	6.79460107346466e-37	76.0183874111823
LHFPL2	-1.46066804410808	10.1536691429443	-18.4660814027557	4.53730689260081e-38	6.80124012366834e-37	76.0161104125783
CBFB	1.36401864729818	8.40360968225098	18.4493542705735	4.94081174609304e-38	7.39645935028759e-37	75.9309467833822
CLIC5	-1.52317817789713	11.4594216722412	-18.4452137800107	5.04614079703905e-38	7.54434046270676e-37	75.9098606622087
SPECC1	-1.39601089249675	9.23114648846436	-18.4292409613667	5.47405107761402e-38	8.17349569581046e-37	75.8284962335271
MELK	2.26109089615885	7.55292857495117	18.4271785412393	5.53189854767357e-38	8.24918428965502e-37	75.8179880640031
GIMAP7	-1.91442233658854	8.51845860400391	-18.4198661528011	5.74199404085144e-38	8.55141670657553e-37	75.7807266316523
MAD2L2	1.42376863419596	7.35392994158936	18.4190224400318	5.76674540941859e-38	8.57719668830555e-37	75.7764269260572
FAM83D	2.86637160693359	6.48216018493652	18.4102627800657	6.03014275823711e-38	8.9574040688401e-37	75.7317808891307
XLOC_007054	2.8535326669108	6.02343742633057	18.4049389157489	6.19610050255475e-38	9.18026355950496e-37	75.7046416134565
SYNE1	-1.01891891170248	7.38753319915771	-18.3890382180169	6.71959689953706e-38	9.94310570744078e-37	75.6235639256703
ALPI	-2.54216400797526	6.76316791027832	-18.3840952669955	6.89122030505851e-38	1.01839867251807e-36	75.5983533195073
AKAP9	-1.5120235830892	10.8781173257446	-18.3731171835082	7.28831023890688e-38	1.07570233193188e-36	75.5423506310471
C21orf88	-3.02631707413738	9.14308370648193	-18.372776614552	7.30099008325187e-38	1.07619581444558e-36	75.5406130379692
LARGE	-1.39789750854493	9.43525186358643	-18.3656903281032	7.56990987665881e-38	1.11441061492013e-36	75.5044552773589
RAD18	1.36579178442382	6.36448635064697	18.3639488424662	7.63750786889762e-38	1.1229279745508e-36	75.4955683829462
SPINK2	-3.69426025838216	6.18024371990967	-18.3592161428069	7.82429362228633e-38	1.14892525584834e-36	75.4714152343936
ATG4A	-1.26374142504883	8.66371736590576	-18.3586295179239	7.84776347623819e-38	1.15090546552923e-36	75.4684212206985
B4GALT4	-1.02721720548503	9.07414667755127	-18.3527304611073	8.08774314710619e-38	1.18459231584108e-36	75.4383112302303
FZD1	-1.32598622851562	8.06753122314453	-18.3446382981532	8.42898341055937e-38	1.23194581874775e-36	75.3970000522938
MCM2	1.99388777661132	8.98851082550049	18.3434170191084	8.48172563748511e-38	1.23758039776317e-36	75.3907646034072
LGR4	-1.41784621679688	10.8102909338379	-18.340489460783	8.60950955184709e-38	1.25463737805489e-36	75.3758166897158
MRPL17	1.3056694411621	9.26414487835693	18.3369248102919	8.7677164058029e-38	1.27607912891023e-36	75.357614370515
MSL3P1	1.40299850610351	6.4339221663208	18.334834748663	8.86183300341351e-38	1.28815068134108e-36	75.3469410605022
CACYBP	1.09030359147135	9.30150667724609	18.3308499056419	9.04409472578641e-38	1.31298841189093e-36	75.3265901542573
FAM92A1	2.84006238517252	5.74662334539795	18.3246429011257	9.33552790782003e-38	1.3535928326219e-36	75.294886514836
ITM2B	-1.19735864322917	11.2638973100586	-18.3242584504304	9.35388602207385e-38	1.35455080623675e-36	75.2929226890196
S100A2	3.23745042028809	5.70534754269409	18.3238034030949	9.37566211835352e-38	1.35600071817141e-36	75.2905982220472
MRPL36	1.10067347094725	10.3155539221802	18.3212534164459	9.49863658430809e-38	1.3720649612446e-36	75.2775719308784
LIG1	1.360708738444	9.31077871228027	18.3087572520791	1.01251113749735e-37	1.46072789511038e-36	75.2137249959772
KTN1	-1.10812424967448	12.432571255127	-18.3046801729034	1.03383636099237e-37	1.48805492607343e-36	75.1928896337574
PTPRF	-1.08563818269856	13.3410524780884	-18.3046426189043	1.03403487098535e-37	1.48805492607343e-36	75.1926977094026
ZNF598	1.08576117187499	9.91304135595703	18.3027009056372	1.04435109974148e-37	1.50102682378055e-36	75.1827741020642
C5orf32	-1.26281304402671	13.4985546560669	-18.2993809915157	1.06222979430566e-37	1.52482227135259e-36	75.1658057590036
GLT25D1	1.10626916455078	8.07823612854004	18.2983735950644	1.06771549593821e-37	1.53079061214922e-36	75.1606566021502
EFEMP1	-3.03086270227051	10.1241656844177	-18.2976892249208	1.07145841113329e-37	1.53424858448862e-36	75.1571584733421
CARS2	1.28921657503255	12.5787307974854	18.2778882791269	1.18565431076809e-37	1.69566218861337e-36	75.0559212837275
SLCO2A1	-2.53344965962728	9.41200230160523	-18.2773025874082	1.18921225156755e-37	1.69864307606185e-36	75.0529260407245
MKI67IP	1.28793690405273	8.67812447772217	18.2708752043192	1.22896910091264e-37	1.75325827057178e-36	75.0200534001963
TTYH3	1.64331343709309	7.55982574713135	18.2670304786756	1.25338642039148e-37	1.78588198613753e-36	75.0003871949518
IMPA1	-1.43767818212892	10.7554712069092	-18.266542119323	1.2565226146678e-37	1.78814026904638e-36	74.9978890488266
PLEKHG4	2.41329173714193	6.80401314196777	18.2655694502243	1.26279250832671e-37	1.79484700906066e-36	74.9929133825812
PPIH	1.17031501139322	9.38102478735352	18.2603734411853	1.29682276686001e-37	1.8409453243344e-36	74.9663313048642
TNFSF10	-1.86310992468261	11.3260252450256	-18.2483848748412	1.37889745776958e-37	1.95504932296555e-36	74.9049864826583
TARBP1	1.29450252416992	7.97209171282959	18.2472281164734	1.38708773554458e-37	1.96424574049415e-36	74.8990664597749
POLE3	1.1067015328776	10.0662498291016	18.2445185987469	1.40646398348386e-37	1.98924053222313e-36	74.8851991142084
TKT	1.64187122200521	12.8077440925293	18.2412950709196	1.42987059071254e-37	2.01986743862052e-36	74.8686998573965
MYO5B	-1.53959802555339	8.6414248458252	-18.2402887269536	1.4372576998904e-37	2.02781756507181e-36	74.8635487341111
SSTR2	-2.84744834073893	6.50850938153076	-18.2397017394905	1.44158419960895e-37	2.03143533849539e-36	74.8605440915666
ESPL1	1.73999248750814	7.9302950652771	18.2391184401197	1.44589647861408e-37	2.03502426239127e-36	74.8575582845805
APPL2	-2.04622188004557	8.98982222277832	-18.2362693937856	1.46714621084535e-37	2.06241394785541e-36	74.8429739029424
KLK8	5.05208194010417	3.58828849487305	18.2313925659941	1.50425112177459e-37	2.11199789046232e-36	74.8180068614361
RPIA	1.03114485327148	11.0246075009155	18.2281864744766	1.52915664520432e-37	2.14435385027618e-36	74.8015915688673
C20orf27	2.11771150305176	8.60354990713501	18.2259344234582	1.54689834368876e-37	2.16659747359664e-36	74.7900602228852
MMP3	5.98209952115885	4.36704764208984	18.1945328337988	1.81695793556538e-37	2.54175656835706e-36	74.6292059758593
UMPS	1.09278352986653	10.3266616160278	18.1927033243842	1.83407897272132e-37	2.56259737194651e-36	74.6198305220228
ACAA1	-1.23329153019207	12.2326716408081	-18.191799302006	1.84259880096774e-37	2.57138454948609e-36	74.6151976386789
TSR1	1.2232964016927	8.05808596850586	18.189332392285	1.86605069837286e-37	2.60096328901378e-36	74.602554835998
HJURP	2.23880387630209	8.468691125	18.1847809204591	1.91010968386987e-37	2.65915873502029e-36	74.5792267414137
CKAP5	1.21947396850586	8.62661343621826	18.1832272386337	1.92538765646366e-37	2.67719463402372e-36	74.5712629121492
CCNB1	2.08679501708984	8.45112778894043	18.1700987621631	2.05948710567794e-37	2.86020576712647e-36	74.503957158126
GNA13	-1.25825792749024	9.03234370758057	-18.1639167248833	2.12584450255258e-37	2.94880981719898e-36	74.472256224991
GSN	-2.24103079842123	12.3098808773804	-18.1629095679517	2.13685693828727e-37	2.96052282784103e-36	74.4670911605541
HPRT1	1.29076393343098	9.7335762767334	18.1557466153509	2.21684917386142e-37	3.06766151585842e-36	74.4303532843709
NOV	-1.95861186612956	7.87383402679443	-18.1533340628748	2.24446321975786e-37	3.10214958443031e-36	74.4179781603724
ATAD3A	1.5684712133789	11.4824181107178	18.1526511642205	2.25234224464786e-37	3.10931126395878e-36	74.4144751173258
HEXIM1	-1.34726210294596	7.5647570479126	-18.1505740839528	2.27647802879382e-37	3.13887108108928e-36	74.4038200268377
NEK2	2.02769516544596	6.3908980848999	18.147956790219	2.30726151888687e-37	3.17751535581947e-36	74.3903929573901
GPER	-2.33210975992839	8.23419946520996	-18.1351186349232	2.46442480741664e-37	3.38990748867442e-36	74.3245190572526
CLDN5	-2.48956768334961	9.09791606231689	-18.1281931436312	2.55362754984677e-37	3.50842249905646e-36	74.2889750708288
SLC25A15	1.56341796569824	6.37541710470581	18.1257754995109	2.58552573097048e-37	3.54801846439247e-36	74.2765654805433
SH3RF1	-1.07714699967448	10.4499915661621	-18.1237368215479	2.6127348075035e-37	3.58109323734754e-36	74.2661005267346
STMN2	-2.66866681429037	8.65622303845215	-18.1192258909381	2.67396663296033e-37	3.66066667198738e-36	74.242943140481
ATP6V1F	1.03014060266113	12.3160321499329	18.1184275622203	2.68495244293793e-37	3.67134600352854e-36	74.2388445618188
ZNF593	1.49628497403971	10.6637825182495	18.109271854434	2.8142340219971e-37	3.84356345634604e-36	74.1918339207542
PYCRL	1.92279330957031	7.13363865136719	18.1050078146924	2.87656069681936e-37	3.92403729612269e-36	74.1699363185577
TWISTNB	1.35395508862305	7.07552116546631	18.0779417144045	3.3058462979931e-37	4.49899531014953e-36	74.0308876535596
SRI	-1.66587268912761	9.03705826977539	-18.0684596122176	3.47100512711198e-37	4.71819293634667e-36	73.9821528678142
C17orf110	-2.34192111360677	8.79798783422852	-18.0655623002697	3.5231054195706e-37	4.78337292949238e-36	73.9672594244606
UCHL3	1.18639459440104	10.7931054248047	18.0607880444816	3.61067728641556e-37	4.89650318594261e-36	73.9427153827133
FEN1	1.92459368513997	6.9695659229126	18.0551221084331	3.71744738500631e-37	5.03105088160813e-36	73.9135835893624
ALG3	1.22841645011393	10.8921608567505	18.0550606993132	3.7186218019694e-37	5.03105088160813e-36	73.913267828226
MYEOV	2.56940528361002	6.27098997698975	18.0456255820622	3.90356469789568e-37	5.27507506127122e-36	73.8647475531435
GINS3	1.67259892504882	8.29563400054932	18.0284492018952	4.2643043587357e-37	5.75581221816703e-36	73.7763891081048
UNC5B	-1.885240397583	8.84278694650269	-18.0212923783041	4.42432896844479e-37	5.96482339406586e-36	73.7395622135011
ADCY9	-1.54260422989909	8.93577176739502	-18.0207604965493	4.43645983279106e-37	5.97419071175029e-36	73.7368250519954
S100A11	1.85149565657551	10.5567710212402	18.016424942061	4.53659743525815e-37	6.1019088256967e-36	73.7145121713761
CBX3	1.33233791316731	11.9174663825073	18.0119053208297	4.64340497703369e-37	6.23829011308478e-36	73.6912494932005
MAD2L1	2.26346277945963	7.78666231945801	18.0081994765016	4.73286396136235e-37	6.35107367667331e-36	73.672173454491
PTP4A1	-1.1842754186198	10.2431110031738	-17.9668024516593	5.85802991427361e-37	7.83358594220788e-36	73.4589634000955
NHSL1	-1.27639970198568	7.51850582385254	-17.9613698992312	6.02440314496784e-37	8.04673175574093e-36	73.4309678598283
NLE1	1.77730651944987	7.51842445806885	17.9579652733948	6.13108226233566e-37	8.17974366179898e-36	73.4134209447358
RPUSD4	1.35856926595052	7.26036260107422	17.9484653485539	6.43889336947895e-37	8.56068326066712e-36	73.3644521547219
SPINT1	-1.33960679874674	11.1509965973511	-17.9469603037549	6.48906420705691e-37	8.61744736344988e-36	73.3566931422218
SRPK1	1.08149281274414	11.5403810039673	17.9439517010092	6.59053673121021e-37	8.74213082861451e-36	73.3411819356554
MAL	-3.0442401319987	6.39500400646973	-17.9369327444944	6.8335102533346e-37	9.05400835519402e-36	73.3049904884845
POLR3H	1.23464285563151	8.79366514416504	17.92252700401	7.36075366918867e-37	9.74137859296645e-36	73.2306917468498
EPHA10	-1.51257701839193	8.48691188854981	-17.9189889367744	7.49638047853351e-37	9.90949286422658e-36	73.2124399296772
HSD17B11	-1.3329835957845	11.5002347776489	-17.9148214370773	7.65935990885199e-37	1.01133381064533e-35	73.1909390601391
NME1	1.52774678776042	11.8377520144043	17.9110811852681	7.8086600612747e-37	1.02922137169616e-35	73.1716405954308
CDC45	2.33280201212565	8.76793819329834	17.9109812426953	7.81268934010703e-37	1.02922137169616e-35	73.1711249008353
DPCD	1.26916873339843	9.51695025	17.909905829527	7.85617802225524e-37	1.03141416927718e-35	73.1655757878489
JAM2	-2.11475222786459	7.44541328100586	-17.9090386258627	7.89142398501239e-37	1.03486284727233e-35	73.1611009272875
ATP6V1D	-1.2741107105306	9.95130821380615	-17.9076658028475	7.94754505311206e-37	1.04103808894571e-35	73.1540168270432
CGN	-1.50617579459636	12.3137948505859	-17.9031264845129	8.13598340650785e-37	1.06451169950983e-35	73.1305911700899
POLR2D	1.3611542582194	8.52337372650146	17.8991111327286	8.30640906775287e-37	1.08557797419487e-35	73.1098673613435
METTL11A	1.42938275463867	8.88235671795654	17.8978606114084	8.360214568756e-37	1.09137251793942e-35	73.1034128306383
VSIG2	-3.74780377929688	11.949218751709	-17.8837597911945	8.99170948053135e-37	1.17248229843987e-35	73.0306183641737
CUL4A	1.02649767911784	8.63138781854248	17.8802091199994	9.15814009735992e-37	1.192834812455e-35	73.0122843786033
SLC30A4	-1.75122777416992	7.45743524078369	-17.871828160459	9.5633600058618e-37	1.24420824816669e-35	72.9690028461924
MAGOHB	1.32162282633463	9.76884565979004	17.8659108038113	9.86026886463974e-37	1.28139029540814e-35	72.938438757523
PCID2	1.57351987272135	8.00189331152344	17.8587603985803	1.02314321573496e-36	1.32812746033523e-35	72.9014999631643
PSMG4	1.35289617976888	10.0452093427124	17.8573539996251	1.03060711869275e-36	1.33631139000802e-35	72.8942337966807
NRIP1	-1.25227790568034	9.58655795831299	-17.8557222071425	1.03933579293067e-36	1.34611502079908e-35	72.8858028251499
RBM19	1.11716327746581	6.96921052737427	17.8530495935273	1.05379269288258e-36	1.36330733679658e-35	72.8719935343527
ATR	1.27302771305338	7.58820639050293	17.8408097610245	1.12262636084223e-36	1.45073027594488e-35	72.8087394438379
STX1A	1.98061643660482	7.00438716131592	17.8230751824742	1.23045589413758e-36	1.58829396323896e-35	72.7170560697052
PRC1	1.91463635270181	9.42659146618652	17.8126418523912	1.29869333250354e-36	1.67450089975036e-35	72.6631000764183
TMEM132A	2.40539672334798	8.31976972018433	17.8109022241113	1.31043536085962e-36	1.68775289437194e-35	72.6541022686824
MUDENG	-1.06377769340006	10.0388909055481	-17.8062545893232	1.34233145313661e-36	1.72690342190912e-35	72.6300616546275
ECT2	2.1852250768636	6.47842497140503	17.7819268596102	1.52246742037397e-36	1.95581664988802e-35	72.5041789147304
FOXN3	-1.15800157600911	8.45104894787598	-17.7817755793431	1.52366040739086e-36	1.95581664988802e-35	72.5033958919211
ARSA	-1.49027035131836	12.6188159414673	-17.778796465286	1.54734581244965e-36	1.98231376535555e-35	72.4879754946566
HRCT1	-2.56297032259115	9.82163189697266	-17.7787470038429	1.54774216085711e-36	1.98231376535555e-35	72.4877194645809
ANKRD13A	-1.0737679625651	8.72649228930664	-17.7747167208961	1.58038308482564e-36	2.02187300985406e-35	72.4668562618305
CDK1	2.21886307023112	8.29320260235596	17.7638226418915	1.67211673371719e-36	2.13449497115815e-35	72.4104517762447
AQP8	-5.9288279555664	10.8559985545654	-17.7531723217102	1.76696804007805e-36	2.25307971216589e-35	72.3552951275863
XLOC_l2_014518	1.40487504882812	10.7218136037598	17.7523968061993	1.77408229188423e-36	2.25715745900105e-35	72.3512782822342
NUP37	1.15458282519531	8.98757168603516	17.7412970886387	1.87911739568042e-36	2.3881572458664e-35	72.2937782242662
MFAP4	-3.18221801310222	11.1461671699829	-17.7408034019306	1.88393155038373e-36	2.39133162789095e-35	72.2912204156913
CES2	-2.00947313500978	10.8567487501831	-17.740615793541	1.88576424893977e-36	2.39133162789095e-35	72.2902484019604
ADH1C	-3.65066985904948	12.8689940710449	-17.7356415028462	1.93501562871268e-36	2.45109067606276e-35	72.2644746215425
NPM1	1.2620586829427	12.586000092041	17.7230040726616	2.06603268682687e-36	2.61417769276107e-35	72.1989812719387
SLC4A2	1.83827253051758	6.39089470001221	17.71898071087	2.10958700179261e-36	2.66636067649818e-35	72.178126088459
FAM89A	1.9502334617513	7.48083034216309	17.7096441056657	2.21424664477188e-36	2.7955773356282e-35	72.1297218658274
POLD1	1.2209695390625	8.87169683520508	17.7049428037322	2.26890529287793e-36	2.85832473344305e-35	72.1053445874125
FNIP2	-1.37505965401205	9.97410093740845	-17.6891452597289	2.46269909117587e-36	3.09232379346234e-35	72.0234108198803
SMCR7	-1.06521658447266	8.16799816638184	-17.6874537057952	2.48441160254853e-36	3.11619287732066e-35	72.0146357651731
TSPAN3	-1.47963911743164	14.0589500822144	-17.682461460988	2.54961907616775e-36	3.19450642293322e-35	71.98873608027
XLOC_l2_014504	1.70609187679036	8.76359596130371	17.6792646832814	2.59227485373044e-36	3.24442478164503e-35	71.9721496297768
SLC19A1	2.33368529720052	6.70265391918945	17.6788966492017	2.59723146262543e-36	3.24710271905459e-35	71.9702400073139
DUS3L	1.42687704858398	9.52232903143311	17.6686225191798	2.7395115510881e-36	3.42127298476625e-35	71.9169237528814
XLOC_006544	1.89644997469076	6.15625437835693	17.6508165050414	3.00489471405973e-36	3.74416211929225e-35	71.8244908519062
PPRC1	1.51499112312825	9.11573018353272	17.650630273654	3.00780265677507e-36	3.74416211929225e-35	71.8235238979573
R3HDM1	1.09959592496744	6.90280852258301	17.6478235105965	3.05197330081061e-36	3.79504813791196e-35	71.8089500532884
CTNNBL1	1.01500526139322	9.58170466894531	17.6452855316326	3.092474818383e-36	3.84126694304965e-35	71.7957710056113
KIAA1161	-1.08083312239584	10.8194613173828	-17.644446739962	3.10597877042461e-36	3.85388775960005e-35	71.7914152092059
KRT19P2	-1.71280218863933	12.7223038536377	-17.6394700859278	3.18732664018634e-36	3.95057141735784e-35	71.7655699456692
SNHG6	1.53512835823567	11.2430621385498	17.6330426509478	3.29556445094909e-36	4.08034064727069e-35	71.7321858110655
SLC17A5	-1.60283927832032	11.2666354970703	-17.6324965238573	3.30492968815652e-36	4.08754554886054e-35	71.729348988523
LOC389906	1.60544618391927	8.37858087939453	17.6287902591491	3.36919672380119e-36	4.16256491267485e-35	71.7100960580285
TLR3	-2.24864940970866	9.06915313442993	-17.6273102201707	3.39521019484787e-36	4.19021283897338e-35	71.7024072265722
AOC3	-2.22493953556316	8.21630408648682	-17.6190254395287	3.54459594069902e-36	4.36989918806819e-35	71.6593626331928
MTAP	1.36766466194661	6.90914978308105	17.6149581274396	3.62033411396379e-36	4.45850334739964e-35	71.6382273126611
SOCS2	-1.68308057584636	9.41180262646484	-17.5968803940793	3.9771289840447e-36	4.89267511196193e-35	71.5442637362174
DNAJC9	1.12851714298502	9.7504980758667	17.5926174641115	4.06628931455084e-36	4.99367520394599e-35	71.5221002065661
PAM16	1.35236664624024	8.78209596014404	17.5925416203679	4.06789365533555e-36	4.99367520394599e-35	71.5217058647382
YDJC	1.22504849723307	9.85049903894043	17.5681715902646	4.61777198743594e-36	5.66266571267809e-35	71.3949596344613
CCNB1IP1	1.20202490763346	9.64971338006592	17.5667648590117	4.65170211180253e-36	5.69821150294875e-35	71.3876411223052
WDR62	2.26871045507812	7.46610208569336	17.5627134748258	4.75082665781827e-36	5.81345848032603e-35	71.3665624540062
MIER3	-1.468579287028	8.75500680804443	-17.5448917357131	5.21268934031975e-36	6.37186320528799e-35	71.2738149356054
PGM1	-1.4823567898763	11.5930023465576	-17.5424821579557	5.27850443906983e-36	6.4454788844447e-35	71.2612720593098
PTRH1	1.47757765315755	9.81716100646973	17.5414103788312	5.30804657584417e-36	6.47469342642918e-35	71.2556927637003
RNASE1	-2.12739876456708	13.155732965271	-17.5391970408224	5.3695809515873e-36	6.54282871341932e-35	71.2441704765095
E2F7	2.2919447113444	6.35223673724365	17.5289367802438	5.66432735071839e-36	6.89468863481847e-35	71.1907493055957
MPP5	-1.25129138138835	10.3390651966858	-17.5254632189289	5.76775171058243e-36	7.0131723594814e-35	71.1726608916641
CLU	-2.96646753719076	9.40088496246338	-17.5249657416105	5.78271846260435e-36	7.02396161416653e-35	71.1700701793838
ALDH4A1	2.31114085644531	8.36052239794922	17.5196192907683	5.94605178350024e-36	7.21475146404286e-35	71.1422255485002
NEDD9	-1.34092955086263	7.81226547076416	-17.5187315698246	5.97361669668868e-36	7.2405762000768e-35	71.1376019050232
CHCHD6	2.09623992944336	6.22129144012451	17.5131139507664	6.1510525053443e-36	7.43999813526797e-35	71.1083406110183
XLOC_008005	-2.09361787548828	8.16668459143066	-17.5095772216925	6.26546841329467e-36	7.5704459538834e-35	71.0899163540318
C16orf59	2.44813366959634	7.6903624440918	17.5079071303549	6.32023790746904e-36	7.6286264250676e-35	71.0812156356739
XLOC_l2_010636	-1.95196763330079	9.95915677770996	-17.5039134347595	6.45316656006557e-36	7.78092583032174e-35	71.0604081846125
C12orf48	1.99778275032552	7.78342369995117	17.4944246672286	6.78037078972411e-36	8.15838560471292e-35	71.0109631339621
C6orf136	-1.08591720060221	9.85756425299072	-17.4867137855206	7.05850607869094e-36	8.48419182159233e-35	70.970774321975
LOC729313	1.02542821370442	13.6210101639404	17.4743451706248	7.52878730745219e-36	9.04003450968764e-35	70.9062943268247
SI	-3.01869443400066	8.46192806988525	-17.4709566829845	7.66303206320672e-36	9.19165146644994e-35	70.8886262017373
MGLL	-1.38062113517253	12.4995387044067	-17.469908041315	7.70506228306081e-36	9.23245872524344e-35	70.8831581279233
GTPBP3	1.40882876204426	7.08054690307617	17.469520036444	7.72067238873835e-36	9.24155665887715e-35	70.8811348675135
TRMT112	1.15865171777344	12.3535104052734	17.4642694817207	7.9350617566858e-36	9.48832540138145e-35	70.853753909934
KCNMA1	-2.21586222045898	7.29220198858643	-17.4593312635138	8.1421525874698e-36	9.72408279246749e-35	70.8279986571674
BID	1.41296424772136	10.8598312133789	17.4587602963043	8.16644437065093e-36	9.73470571463219e-35	70.8250205873798
FAM203A	1.55691374365234	8.63194698229981	17.4527023258706	8.42870797873429e-36	1.00369542221973e-34	70.7934207583856
LGALS3	-1.17784991048178	15.9524028925781	-17.4492494567568	8.58195924312538e-36	1.02089003297736e-34	70.7754077480886
MCM4	1.76219127083333	8.13165216772461	17.4302528663741	9.47656386246783e-36	1.12614795507904e-34	70.6762797151794
SMPD1	-1.99122158276367	8.9689731975708	-17.4071365741354	1.06925289801387e-35	1.26933863598412e-34	70.5555945556486
KRCC1	-1.31968724003093	10.2824190799255	-17.3994693866931	1.11295214236957e-35	1.31985589970103e-34	70.5155513658997
SH3BGRL2	-1.21569820955403	8.66589284173584	-17.396300452657	1.13153342107554e-35	1.34051240953111e-34	70.4989989658814
AKR1B1	-2.2459668647461	10.784748053833	-17.3890649784889	1.17513568101906e-35	1.39073808984668e-34	70.4612010596322
RPS2P32	1.06160660929361	14.1121834234009	17.3836731425933	1.20872188268127e-35	1.42901919401713e-34	70.4330300975381
PCK1	-3.30038410001628	11.5611469863892	-17.3688322497842	1.30623156217963e-35	1.54113932622769e-34	70.3554718548001
CD8A	-2.15618630106609	8.91941577877808	-17.3685537572855	1.30813497169385e-35	1.54180693442894e-34	70.3540162003059
CDR2L	1.68124401749675	6.89798287554932	17.3563127373851	1.39460992084075e-35	1.64037434260523e-34	70.2900241496604
NUP35	1.26925683821614	8.04378940917969	17.35462459064	1.40697788582815e-35	1.65131327737239e-34	70.2811976323376
SNORD43	2.47686789607747	6.05870097637939	17.3544575520556	1.40820764436286e-35	1.65131327737239e-34	70.2803242479896
SNORD86	2.81015596736653	7.51752561529541	17.3492868176594	1.4468139544706e-35	1.69486020865677e-34	70.2532866605049
KIF23	2.06680902229817	8.25969373425293	17.3457880340403	1.47353831555579e-35	1.7244138236966e-34	70.234989790388
LRRC1	-1.39663975244141	10.8119314742432	-17.3454647064618	1.47603284159526e-35	1.72558119321182e-34	70.2332988750234
GALNT7	-1.29593650301107	11.436675397522	-17.3447408277384	1.48163307644271e-35	1.73037330011704e-34	70.2295131396985
CEP250	1.07604190600586	7.54635411322021	17.3376728675125	1.53744805263732e-35	1.79374126546057e-34	70.1925458107331
TELO2	1.37424493440754	10.4777957384033	17.3263829659617	1.6310182107276e-35	1.90098553236168e-34	70.133483933202
FAM134B	-2.14364968432617	11.6543410960083	-17.3189676623339	1.69556763328234e-35	1.97422304129753e-34	70.0946831172168
MRPL50	1.14213309200032	10.1042121045837	17.3144984510991	1.73570470253274e-35	2.01891706418717e-34	70.0712945821099
RCN1	1.51603644946289	10.684371380188	17.2884841621601	1.98902466769105e-35	2.3089111122331e-34	69.9351067078109
TAF1A	1.51596390071615	6.36728615966797	17.2844804834994	2.03118239585213e-35	2.35547680855005e-34	69.9141396470573
SLC25A14	1.00177288020833	8.73629952905273	17.2820878692433	2.05680328372321e-35	2.382791100651e-34	69.9016087153445
LINC00294	-1.31687188590495	8.30104571374512	-17.2741195284038	2.14449498525495e-35	2.47939756218995e-34	69.8598707816774
FBXO5	1.61621448217773	6.75961154632568	17.2604152923887	2.30418545924921e-35	2.6613572934635e-34	69.7880703015234
BHLHE41	-2.36397655281576	9.39251569732666	-17.2542202972155	2.38024249774129e-35	2.74645197912551e-34	69.7556054107117
UHRF1	2.12221484655761	7.4087943732605	17.2440922547465	2.51005641462448e-35	2.89045157756008e-34	69.7025193086963
TMEM131	-1.06007679036458	8.90164507592773	-17.230442694176	2.69633027448793e-35	3.09876361655258e-34	69.6309554298813
GNL3LP1	1.067702738444	7.16177784631348	17.229018339323	2.71655128619775e-35	3.11889309521927e-34	69.623486311313
FAM126B	-1.11900241837565	8.73521824493408	-17.2255425495382	2.76653742588632e-35	3.17312208041707e-34	69.6052587177032
XLOC_001595	-3.37673260229492	7.10669213922119	-17.2189612817725	2.8637290546916e-35	3.28133248642446e-34	69.5707414796632
PLAGL2	1.35566908935547	7.77870025646973	17.2085219274665	3.02498077707863e-35	3.46265674452685e-34	69.5159786624452
C16orf62	-1.51473528287761	7.78684264086914	-17.2071267025223	3.04721216347261e-35	3.48119074413764e-34	69.5086585809544
DGKA	-1.31104691056315	7.91919712042236	-17.2051430661734	3.07910205852684e-35	3.51413954738999e-34	69.4982509775224
NAA16	1.32551065698242	6.67783978240967	17.20024919592	3.15921941181229e-35	3.59845080632018e-34	69.4725721190835
ZNF259	1.14399181913249	9.26153270742798	17.1944353016407	3.25712447547895e-35	3.7063054125218e-34	69.4420619775866
PSMA7	1.26453409594726	12.1641912095337	17.1941862913244	3.26138516769581e-35	3.70749377002265e-34	69.4407551301127
C1orf210	-1.65998869303385	8.06081221972656	-17.1898480150101	3.3365201411436e-35	3.78916922827214e-34	69.4179859274554
C10orf99	-1.65348653605144	15.0676105922241	-17.1831961788761	3.45511464252577e-35	3.91999079570813e-34	69.3830696960294
NMB	1.76387267480468	9.13201565283203	17.1807280449812	3.50018772800706e-35	3.96722359299286e-34	69.3701128189974
LOC100507246	1.28035206608073	10.8178076953125	17.1642887605242	3.81584999870447e-35	4.31651648037943e-34	69.2837932167437
PLK1	2.67729612353515	5.94906296301269	17.1628635704521	3.84452768550341e-35	4.34469319909782e-34	69.2763082663422
CDCA8	1.49631077604166	9.94926491772461	17.1573622247651	3.95727114589542e-35	4.46772424081651e-34	69.2474134589303
GEMIN8	1.17616808260091	6.58448435284424	17.1518720127051	4.07309753070503e-35	4.59399170610928e-34	69.21857347031
OCEL1	-1.3564998671875	8.65715702685547	-17.1425442671018	4.27774544504355e-35	4.81579246163095e-34	69.1695666075813
ST3GAL4	-2.56626811437989	10.3618981460876	-17.1425282822767	4.27810486745042e-35	4.81579246163095e-34	69.169482616167
TMCO1	-1.27210769873047	11.1296852723389	-17.1360186472429	4.42702600186656e-35	4.97856865595277e-34	69.1352755112783
RFC5	1.14311674112956	9.39375514508057	17.1326109983185	4.5070479631875e-35	5.06362006546416e-34	69.1173668069682
PRDX4	1.60583126782226	12.3963175147095	17.124805380111	4.69586634533078e-35	5.27061843842531e-34	69.0763395262357
BMP3	-4.46861895865885	6.70755700097656	-17.1232034772367	4.73558841869237e-35	5.31003187765243e-34	69.0679188171153
CLDN7	-1.17789241284181	12.7006120154419	-17.122099679846	4.76315528874075e-35	5.33575228506458e-34	69.0621163140437
CENPF	2.06481319685872	9.86833030963135	17.1194039372417	4.83115972945544e-35	5.40667749528474e-34	69.0479445655235
SLC4A11	2.62910378263346	5.86580656512451	17.1148186379771	4.94907896531659e-35	5.53327189458819e-34	69.0238372362041
PRKDC	1.69126401017253	7.37884297943115	17.1140823472031	4.96828156761535e-35	5.54935868506803e-34	69.0199659313446
GCSH	1.02505417248534	10.5564369450989	17.1030707543871	5.26455918742427e-35	5.87459571669309e-34	68.9620608258557
GNA11	-1.49503128377279	9.92847112689209	-17.1000087227799	5.35005576512514e-35	5.96422560972897e-34	68.9459563469831
SDCCAG3	1.10251789217122	8.36013191217041	17.0987811857331	5.38472080811987e-35	5.9970702178935e-34	68.9394999082794
PTDSS1	1.11296232430013	11.7790990170288	17.0881971575826	5.69312383692275e-35	6.32221950560776e-34	68.8838238646895
FLVCR1	1.71491928808593	6.88806694799805	17.0858976113175	5.76244124151157e-35	6.3930375544662e-34	68.871725579592
PTTG1	1.87384471077474	11.21180677771	17.0785541171378	5.9895304347184e-35	6.63858820394221e-34	68.8330859895065
SMPD3	-1.68232825358074	11.9755836816406	-17.0681326334771	6.32731976991004e-35	6.99952159191488e-34	68.7782396226206
ASB9	2.79235778344726	5.96804342193604	17.0638862617042	6.47038388987687e-35	7.1509218694737e-34	68.7558879820142
ARL14	-2.329746261556	9.6537686907959	-17.0568710211008	6.71388680236e-35	7.41292846463637e-34	68.718957069158
RAB37	-1.69853135172527	7.92615715515137	-17.0532415049435	6.84346088092623e-35	7.54876302147719e-34	68.6998475748145
SLC16A9	-2.43966841373698	8.5556583046875	-17.0444153782671	7.16913284242244e-35	7.89289343596977e-34	68.6533711627124
FANCG	1.28061245670573	9.11527854589844	17.0397798724956	7.34636576261588e-35	8.08030134977798e-34	68.6289578610704
LOC729680	1.99913432788085	7.55858010540771	17.0382401129317	7.40620497216597e-35	8.13835316626856e-34	68.6208480076632
SLC25A20	-1.40583662162273	8.87759489028931	-17.0355367495578	7.51245168972322e-35	8.24186692071452e-34	68.6066088069676
CA4	-4.37586578385417	12.7358966647949	-17.03547979578	7.51470645759604e-35	8.24186692071452e-34	68.6063088096013
LSM2	1.00627189803059	10.5241983545532	17.0315812091334	7.67067599022858e-35	8.40493176229704e-34	68.5857725307013
HM13	1.41800651611328	9.78780613293457	17.0279325577204	7.81959067652667e-35	8.55996407676381e-34	68.5665511563971
ANO5	-3.05966598714193	6.85767472473144	-17.0207145700894	8.12279168221131e-35	8.88343640615273e-34	68.5285215202823
SHOC2	-1.04274374682617	8.68021185528564	-17.0129038719362	8.46420831398931e-35	9.23929254122678e-34	68.4873619811059
TP53INP1	-1.6910673885905	8.51468019720459	-17.0078773442927	8.69151051850784e-35	9.46947464525896e-34	68.4608701226495
KIF4A	2.68051953540039	6.26838490289307	17.0043489190917	8.85472051961764e-35	9.63818351554604e-34	68.4422720602204
CIT	1.58154334895833	8.25437718383789	16.9974472156786	9.18291729867665e-35	9.9859894058345e-34	68.4058893710411
IPO4	1.81792373315429	7.55070572406006	16.9938483712434	9.35887166723589e-35	1.01581651326015e-33	68.3869156012648
SYNPO2	-2.57126229471843	7.42163502963257	-16.9927161189204	9.41492687017376e-35	1.02093943586541e-33	68.3809458365148
BORA	1.6320777561849	7.6652736706543	16.9919525535187	9.45291948922964e-35	1.02409589240931e-33	68.3769198748817
RBBP7	1.032679707194	11.495792506958	16.9906803289866	9.51656371050616e-35	1.03002281587798e-33	68.3702118101947
UGT1A6	-2.35248469665527	9.46743107937622	-16.9885759377689	9.62278394006724e-35	1.04054249978569e-33	68.359115548664
ITPKA	-2.18335614754232	11.6364468560181	-16.9824995792526	9.93622192030284e-35	1.07342858552325e-33	68.3270724792275
EAPP	-1.18677526310222	10.8291530640259	-16.971115848627	1.05512976718319e-34	1.13880906613489e-33	68.2670295645922
KIAA1468	-1.03334181494141	8.27809676965332	-16.969794951104	1.06250995654354e-34	1.14570180253296e-33	68.2600615485213
TSHZ1	-1.25453271126302	8.77346057568359	-16.9675061651753	1.07542094501004e-34	1.15853992832997e-33	68.2479872183556
RHOC	-1.41500139095053	12.5488308383789	-16.9669590333539	1.07853056677311e-34	1.16080502737569e-33	68.2451007694622
CEBPB	1.37310328898112	10.8231616807251	16.9666602846455	1.08023231398389e-34	1.1615520413519e-33	68.2435246754548
EPHX2	-1.8473057578125	11.4461032436523	-16.9596697013605	1.12083147110542e-34	1.2032295295918e-33	68.2066417349707
LY6E	2.49772602172851	7.34923750811768	16.9596277549499	1.12107965193163e-34	1.2032295295918e-33	68.2064204042532
GAR1	1.0777690390625	11.0708142248535	16.9571751833647	1.1356869417344e-34	1.21777333742999e-33	68.1934790147029
LMBRD1	-1.25042507942709	11.2710264196777	-16.9551065626897	1.14815596721667e-34	1.22999942696157e-33	68.182563042481
LOC727803	1.57682059122721	9.53359517669678	16.9504580791184	1.17667959138626e-34	1.25938585421629e-33	68.1580314326415
MTMR10	-1.02632071028646	9.72737926635742	-16.9492822421204	1.18400675302035e-34	1.26605248998753e-33	68.1518257345906
GNG12	-1.36004892773438	10.9970038723145	-16.9477244042996	1.19378495210266e-34	1.27532522176899e-33	68.1436037006778
NXT1	1.59611152416992	10.0121860333862	16.9457570143134	1.20624979414328e-34	1.28744827565645e-33	68.1332196957479
SCNN1A	-1.77403249910482	10.3369641499634	-16.9446927871158	1.21304683709839e-34	1.29350517032684e-33	68.127602445759
NUTF2	1.0561650238444	9.37243053948975	16.941903407883	1.23104524142013e-34	1.31148414952402e-33	68.1128787787421
SEMA4G	-1.48187402783205	10.1210726556396	-16.9403751805297	1.24101956669356e-34	1.32088943169683e-33	68.1048116738127
UAP1	-1.1292393951823	9.72853570898437	-16.9233433382895	1.35782947986503e-34	1.44255303358564e-33	68.0148861581865
SELS	-1.06930774869792	10.7737295512695	-16.919415191032	1.38630096520807e-34	1.47144486426827e-33	67.9941412067449
RHEB	1.31455748461913	7.42158962188721	16.9178127663662	1.3980869329553e-34	1.4825895194274e-33	67.9856781054357
TXLNG	1.41178905289713	7.64432667932129	16.9120662443748	1.44118677759803e-34	1.52688970453791e-33	67.9553256941148
NUP85	1.10925229862467	9.3589724803772	16.907628018308	1.47538544658617e-34	1.56168668896224e-33	67.9318808305555
AKR1B15	-3.0010983873698	10.7945979245605	-16.9060347584834	1.48786009648469e-34	1.57344617726413e-33	67.923463883534
BLOC1S1	-1.03271393994141	11.1366688936768	-16.8980305709884	1.55215132028453e-34	1.63993109705956e-33	67.8811743900858
TP53INP2	-2.10069460664877	7.32227944058228	-16.8950141262869	1.57709752869781e-34	1.66476219902011e-33	67.8652352522484
MGP	-3.31165267342123	10.6128667411499	-16.879695380666	1.71013848340138e-34	1.80354677933831e-33	67.7842729542746
ASNS	1.67251896492512	10.8977847418823	16.8790102587948	1.71634522031647e-34	1.80843796659854e-33	67.7806513073272
AKR1B10	-3.0936053413086	11.5414725753174	-16.8758685432778	1.7450980252198e-34	1.83705433211951e-33	67.7640430549149
MND1	2.01970929541015	7.37122124597168	16.8718887532391	1.78221644402603e-34	1.87441687502629e-33	67.7430027408104
ATP6V0D1	-1.09398809944662	11.9551130806885	-16.8688870486551	1.81073620005197e-34	1.90267604175014e-33	67.7271321063497
TRIM10	-1.38430420743815	8.67449940264893	-16.8653639986895	1.84479460011487e-34	1.9366983019603e-33	67.7085036368995
SPRR2D	-1.49894506998699	8.75994673242188	-16.8551053841147	1.94767667683904e-34	2.04284522783654e-33	67.6542517668876
RACGAP1	1.7301173605957	7.46588098565674	16.8532666619548	1.96671689290283e-34	2.06094051131736e-33	67.6445265018278
CALU	1.1375522364095	8.04137053094482	16.8487267307897	2.01453295807164e-34	2.10913000978127e-33	67.6205124259055
CETN2	1.2555732027181	8.5442017901001	16.8481836644298	2.0203303464762e-34	2.11328020905909e-33	67.6176396984176
FMNL2	1.30173030021158	6.75480316766357	16.8435637728557	2.07033150204921e-34	2.16361842467101e-33	67.5931998439776
JDP2	-1.14379988346355	10.0147701147461	-16.8403480640381	2.10586697681657e-34	2.19876165233375e-33	67.5761868032527
PRPF6	1.04062741796874	10.6953585180664	16.8401166777345	2.10844743125079e-34	2.1994636687808e-33	67.5749625824359
DOM3Z	1.03757349178059	7.6597190947876	16.838240211538	2.12949170284414e-34	2.21940785340727e-33	67.5650343215263
POLA2	1.6265625016276	6.31553279956055	16.8335052088242	2.18353654292456e-34	2.27367892775893e-33	67.5399798615015
SERINC2	-1.61637359183757	8.97987621682739	-16.8277301595969	2.25132058547359e-34	2.34214552245073e-33	67.5094185519233
HIST2H3A	2.31361668147786	10.9135369351807	16.8241265630172	2.29468413334351e-34	2.38510586159158e-33	67.4903464598691
CLPB	1.78554749487304	6.97224193328857	16.8230155674652	2.30822162445927e-34	2.39701537523802e-33	67.4844661859781
RBKS	-1.35406891739909	9.93656179742432	-16.8099083806453	2.47411933940848e-34	2.56698232451499e-33	67.4150813991398
TRIM27	1.07566444661458	9.02898816259766	16.8052587302929	2.53580455421044e-34	2.62861682521436e-33	67.3904628838047
NFXL1	1.1739541015625	7.34616647094727	16.7923017481118	2.71597245347046e-34	2.81032445881095e-33	67.3218459325377
RTKN	1.56456699104817	8.1490970111084	16.7872745483172	2.78928935634035e-34	2.8835998574471e-33	67.2952177524649
CTU2	1.59245592285156	6.32378911425781	16.7807763491011	2.88701253292281e-34	2.98195281962377e-33	67.2607934948625
DDX19A	1.04938558756511	8.29963044091797	16.7663147526733	3.11701399474519e-34	3.21663565957277e-33	67.1841650565721
SNRPD2	1.02772879239908	12.1364626234741	16.7539736627644	3.32779112944881e-34	3.43107766987088e-33	67.1187530013907
STIL	1.46590869222005	8.35300494812012	16.7516505918204	3.36904008273424e-34	3.47050268397477e-33	67.1064378964739
C17orf79	1.16384485375976	11.9922125615845	16.745055237337	3.48896845701144e-34	3.59083387535454e-33	67.0714709937508
PRMT1	1.30555976936848	11.2017833831787	16.7405558142486	3.57323605485006e-34	3.67428117789979e-33	67.0476132263332
RIOK1	1.16257942716471	7.79023277679443	16.7365580983846	3.64982078046494e-34	3.7463476523971e-33	67.026413698412
SUCLG2	-1.19301572013347	10.6048962351685	-16.7361886203555	3.65698159757502e-34	3.75035826292236e-33	67.0244542938926
CAB39	-1.04157572623698	9.16358657006836	-16.7277564509658	3.82429557476376e-34	3.91845823024905e-33	66.9797326701096
MXI1	-1.95343348527019	10.5108471137085	-16.7198336389171	3.9885023698287e-34	4.08307875817189e-33	66.9377048365941
STIM1	-1.27750816988118	8.9004469928894	-16.7195692648594	3.99410216743965e-34	4.08518329051258e-33	66.9363022934821
FMO4	-1.58660963533529	7.45612526654053	-16.7143974196964	4.10525075526328e-34	4.19514410070211e-33	66.9088632308732
C8orf55	1.71037376538085	9.34847213128662	16.70997723485	4.20270407311938e-34	4.29092735614234e-33	66.8854095662834
STAP2	-1.42863369108072	11.9006526413574	-16.705706793214	4.2990620244152e-34	4.38542371287027e-33	66.8627482462488
FUS	1.19239634643555	9.57870639422607	16.7007491956353	4.41371138820489e-34	4.49442148161111e-33	66.8364377882403
GALNT1	-1.17204825113933	9.59075438171387	-16.6971212774237	4.49955174130884e-34	4.57778754828482e-33	66.8171822252844
KBTBD6	1.12887623209635	7.32730829492187	16.687078128338	4.74602980496369e-34	4.82429325941944e-33	66.7638690139167
PPARGC1A	-2.36259525903321	8.30179164422607	-16.6746289506159	5.07046273262983e-34	5.14500210554789e-33	66.6977670382025
UBFD1	1.25907908691406	8.27760498193359	16.6697451172782	5.20373957520033e-34	5.27095835530178e-33	66.6718301172676
GCNT3	-2.47013325447591	10.3621489535522	-16.6678659947125	5.25595192520731e-34	5.31917101333316e-33	66.6618497763926
PAK1IP1	1.19422983650716	8.26069419146729	16.6614479532541	5.43827979631191e-34	5.49886414141118e-33	66.627759315771
ATAD3B	1.6086519938151	9.61227337084961	16.6580363733304	5.53777000451965e-34	5.59455520088502e-33	66.6096361787883
AKAP13	-1.14190725138347	10.3635299981079	-16.6572818824364	5.56001849956967e-34	5.61211324383008e-33	66.6056279551984
CTSO	-1.64475011645509	9.8609529586792	-16.6503009742396	5.77017737038288e-34	5.81914562978158e-33	66.5685387778965
TRIM28	1.31458164127604	10.111049050293	16.6451787355892	5.92943906424158e-34	5.974531826356e-33	66.5413209490767
GPN3	1.23978825683593	8.42399739990234	16.6443727136153	5.95489895858061e-34	5.99494500397893e-33	66.5370377412826
AARS	1.38302955655924	7.4223522432251	16.6345923296019	6.27272290546435e-34	6.30939589278251e-33	66.4850585871025
MCM6	1.61153258105468	9.43488889086914	16.6263723603398	6.55297940608601e-34	6.58554434297763e-33	66.4413637393548
NAT2	-1.73007483341471	8.51845407745361	-16.6191774330538	6.80858995735014e-34	6.83646484654836e-33	66.4031111646753
GTF3A	1.79115003914388	11.6446761744995	16.6148105601173	6.96858810796849e-34	6.9910282959576e-33	66.37989125857
GSTP1	1.15623885351562	15.1359385803223	16.6089604788086	7.18886292513572e-34	7.20574112504691e-33	66.3487811911799
LOC541471	1.53620193929036	8.77051491052246	16.6064740125861	7.28459148840121e-34	7.29535065914863e-33	66.3355572259252
RFWD3	1.12875059529622	7.60944813873291	16.5974807988669	7.64164288615915e-34	7.64628624555178e-33	66.2877218464362
CLRN3	-1.20480876220704	12.5501572884521	-16.5936496729831	7.79903681700169e-34	7.79700757932164e-33	66.2673409941988
CDT1	1.9789157948405	9.0896579331665	16.5915536166428	7.88652253936351e-34	7.87081777586521e-33	66.2561896471347
POLR3K	1.27662030639648	9.58018175823975	16.5897149513912	7.9640762421514e-34	7.941341422429e-33	66.2464072353589
SSBP2	-1.32389640555827	7.39368841500854	-16.5831535147504	8.24712952856485e-34	8.21647900395566e-33	66.2114946083828
KIAA0226L	2.08481775480143	8.72285856134033	16.5701208335674	8.83966238853159e-34	8.79161245492697e-33	66.1421342468912
RFC2	1.59300510864257	7.31268276446533	16.5686960145384	8.90698107789063e-34	8.85092852455563e-33	66.1345501025737
C1orf115	-2.21693602994792	7.61610351074219	-16.5681057778973	8.93501867711329e-34	8.87114214393496e-33	66.1314082724166
NAPEPLD	-1.19073191495769	9.88085587030029	-16.5578215683339	9.43801756946675e-34	9.36248094003814e-33	66.0766588494964
ENOPH1	1.09874409912109	8.83624333532715	16.5572743426862	9.46556530999702e-34	9.3817344220409e-33	66.0737452695597
TMEM237	1.46621337426758	6.84745862164307	16.5441814057029	1.0149299956091e-33	1.00507715286822e-32	66.0040243920045
BOD1	1.07787503816731	8.26772413543701	16.5307872266384	1.0900127637297e-33	1.07850447446457e-32	65.9326785746937
PIGZ	-2.07648983764649	12.5781826091919	-16.5244159956194	1.1276607805113e-33	1.1147980975089e-32	65.8987340143231
GPR172A	1.22165362797038	12.9378237427673	16.5097744282423	1.2192023521246e-33	1.20426268319968e-32	65.8207088509936
ATP2A3	-2.00017473404949	9.77641790234375	-16.4866595186834	1.37915267853087e-33	1.35876007909619e-32	65.6974780501128
MBP	-1.08699030981446	9.58260273822022	-16.484971723194	1.39162596994805e-33	1.36987810039207e-32	65.6884775846979
PGCP	-1.78265053238933	8.76672609875488	-16.4699087213372	1.50808546047844e-33	1.48215266470083e-32	65.6081367519445
FAM86C1	1.59180146638997	6.63059819781494	16.4698877054953	1.50825459850271e-33	1.48215266470083e-32	65.6080246422212
CPEB4	-1.03208157250977	8.55562113641357	-16.4667831362998	1.5334509485575e-33	1.50562939386902e-32	65.5914626460702
DHRS1	-1.11900357332357	10.2699495918579	-16.4661993039057	1.53823627374112e-33	1.5090425129714e-32	65.588347940193
SRD5A1	1.3573505756836	7.90342745446777	16.4571397153928	1.61444352340732e-33	1.58245667468675e-32	65.5400105594936
CLEC2D	1.24650073518879	10.2645594505615	16.4548207872026	1.63455192698957e-33	1.60080544285546e-32	65.5276363932857
NAA10	1.28885213781738	9.0623854828186	16.4510200974223	1.6680546593521e-33	1.63084529757011e-32	65.5073539579489
DPH2	1.5637627836914	8.41355723681641	16.4367555329431	1.80006391159238e-33	1.75692944190731e-32	65.4312158910763
PID1	-1.72381401774089	10.2754506126709	-16.4353622269638	1.81350756702161e-33	1.76855344543639e-32	65.4237777566553
GFRA2	-1.8949005937907	6.80132700808716	-16.4301050809231	1.86514662375093e-33	1.81737490549256e-32	65.3957105587654
PTTG2	1.80981371736653	9.43299980889893	16.4265787776985	1.90060905427439e-33	1.85036491289028e-32	65.376882296013
CHPF	1.30961603222656	9.28491644970703	16.4261477973342	1.90498940200552e-33	1.85306437442342e-32	65.3745810300789
EMD	1.55588850935873	8.35872193780518	16.4206828823273	1.96142027434597e-33	1.90474233381516e-32	65.3453986551624
MS4A12	-5.00216317814128	11.7982038989868	-16.4200142463379	1.96843889402088e-33	1.90994908513289e-32	65.3418279336191
SQRDL	-1.25307640006511	14.7303606606445	-16.4148123406444	2.02391122749125e-33	1.96047266548669e-32	65.3140463837398
MAP6D1	1.38497054117838	6.69862329797363	16.4123042463009	2.051215357148e-33	1.98525268025567e-32	65.3006504091618
IFRD2	1.56211670149739	9.50516960620117	16.4095987688251	2.0810831156301e-33	2.0124702243178e-32	65.286199372303
TJP3	-1.44835780069987	9.21389193695068	-16.4053827409671	2.12849984337463e-33	2.05659829795301e-32	65.2636781861205
IL6R	-1.87128775081381	7.12060595129395	-16.403912539242	2.14528873725145e-33	2.07108402632307e-32	65.2558241738319
LOC100505633	-1.93563908365886	10.7589558747559	-16.401687869485	2.17094641805601e-33	2.09410036493152e-32	65.2439392159144
C15orf23	1.62599282763672	9.4108064630127	16.399932209082	2.19141225086604e-33	2.11207433241913e-32	65.2345594628405
GIPC1	-1.1674875197754	14.6605095128784	-16.3910452328431	2.29801903164022e-33	2.21297120950015e-32	65.1870746049444
MFSD11	-1.09666653971354	9.62787691918945	-16.3898509163914	2.31273737672573e-33	2.22528578810663e-32	65.1806924388433
BUB1	2.17895278304037	7.38375422888184	16.3803378582843	2.43340388364295e-33	2.33702196903286e-32	65.1298508250502
P2RY1	-2.10333162882487	7.81083027801514	-16.380219296062	2.43494698083497e-33	2.33702196903286e-32	65.1292171145405
IRAK1	1.44386840397135	8.05776202929687	16.3722011839621	2.54161609286797e-33	2.43737177225367e-32	65.0863568313192
DNMT1	1.66794364803059	7.20325366534424	16.3699111228264	2.57293462702917e-33	2.46535473364632e-32	65.0741140938268
B3GNT7	-2.61723792399089	11.1023527335205	-16.3686765331303	2.58997915137519e-33	2.47962538853005e-32	65.0675136870223
TCN2	-2.20341106473796	7.53957028414917	-16.3682934523648	2.59529090791509e-33	2.48264882120641e-32	65.0654656112643
FOXM1	2.33475353995768	7.27908782623291	16.3667863313972	2.61629486714134e-33	2.50066591488708e-32	65.0574078818422
METRNL	-1.09858284073894	12.0640437277222	-16.3580072894809	2.7420815435706e-33	2.61872195134534e-32	65.0104660435916
VIP	-3.24057186450196	6.87031183831787	-16.3555495113448	2.77837249564636e-33	2.65118375474466e-32	64.9973226201389
C20orf134	1.3351098293457	7.86715101617432	16.354985068472	2.78677478690784e-33	2.65700189980866e-32	64.9943040586463
DDX11	1.68137776513671	7.57834610754395	16.3541535256431	2.79919962796882e-33	2.6666424885617e-32	64.9898570167648
COL23A1	-1.83166255696615	11.0940167788086	-16.3532759170651	2.81237311404325e-33	2.67697975933745e-32	64.9851635311476
MRPL3	1.10631127213541	10.3419542399902	16.3503590911163	2.85660551162712e-33	2.71683925185857e-32	64.9695635892035
PLCD3	-1.62523092903646	7.73283969335937	-16.3501324571894	2.86007142184557e-33	2.71789309807204e-32	64.9683514509293
TTK	2.3284199226888	5.97122177307129	16.3488594542126	2.8796180566585e-33	2.73421394885523e-32	64.9615427586426
REG3A	5.86685391894531	4.13709188671875	16.3481049871398	2.89126595227531e-33	2.74301420838498e-32	64.957507381728
ATP8A1	-1.80117765608725	10.6225858690186	-16.3477857500201	2.89620875037839e-33	2.74544393631676e-32	64.9557998757096
ELOVL5	2.31765916959635	6.54930517651367	16.3460812927699	2.92274306623315e-33	2.76832040464006e-32	64.9466830326254
FBLN1	-2.74948257519532	9.8998483215332	-16.3458406229874	2.92650933292832e-33	2.76961191138463e-32	64.9453957050564
PSRC1	1.74182098697916	6.54616076049805	16.341689037619	2.99225039747046e-33	2.82950535944561e-32	64.9231880804669
OPTN	-1.47843970483399	9.89059139337158	-16.3381132406189	3.05006120741014e-33	2.87944762799482e-32	64.9040588598542
LOC100507002	-1.82685577254232	8.37143345758057	-16.3226089784148	3.31398052336353e-33	3.12348761184067e-32	64.8210995641787
DNAJA3	1.08979768196614	10.4283332348633	16.3147913263282	3.45563253804621e-33	3.25167969518847e-32	64.7792587977428
SRPX	-2.72390937927246	7.29872346096802	-16.3068470261069	3.60580961481139e-33	3.38746270822583e-32	64.7367329709048
PRPF19	1.05804363232422	13.0829971724854	16.3056661820173	3.62868467566169e-33	3.40617656810687e-32	64.7304112925449
TCERG1	1.23755171215821	6.41971798443604	16.3010265713145	3.71998200121554e-33	3.486197766505e-32	64.7055714629152
TROAP	2.12625955395507	8.70341497637939	16.291319950568	3.91851646583298e-33	3.66629377448513e-32	64.653595537515
ACSS2	-1.03217706372071	11.2293322362671	-16.2849858732297	4.05377282336062e-33	3.78440220666819e-32	64.6196726741084
GNL3	1.20943640543619	10.1817714783936	16.2849478205558	4.05459939727181e-33	3.78440220666819e-32	64.6194688647654
C19orf33	-1.37783384269206	14.2725660890503	-16.2708649645005	4.3724243175505e-33	4.07444907909496e-32	64.5440299251574
C8orf59	1.19904278255208	10.8924293505859	16.2668749979704	4.4669363847751e-33	4.15915797312622e-32	64.5226523515261
NOM1	1.35022506262207	6.49094557192993	16.266498063524	4.47597035247422e-33	4.16420583155531e-32	64.520632705083
PLOD3	1.03207081144205	11.5416252749634	16.265794130593	4.49289062180736e-33	4.17657662883657e-32	64.516860929511
TMEM9	1.17075857609049	8.52947249932861	16.2591600341177	4.65554143671176e-33	4.32428897187562e-32	64.4813116708784
SNAR-G1	5.22480247371419	7.24701642572021	16.2579771433042	4.68515786851026e-33	4.34829426331061e-32	64.474972538072
POLQ	2.19579983129883	6.06194539825439	16.2573597960239	4.70068964732452e-33	4.35919948227753e-32	64.471664099181
HCFC2	-1.00167222998047	7.08630177868652	-16.2504064660526	4.87923921268883e-33	4.52114070777043e-32	64.4343973356867
NUP93	1.46708867049153	7.5091671116333	16.249051781003	4.914809839436e-33	4.55044281278545e-32	64.4271361781753
ISX	-2.6010219112142	11.0907339800415	-16.2460479961996	4.99461316333484e-33	4.62061845375287e-32	64.4110350383553
TUBB	1.10023874845377	10.2325163861694	16.242985180632	5.07732461689165e-33	4.69336975612751e-32	64.3946164096912
PODXL	1.37496932364908	9.77559814984131	16.2412538276878	5.12468685659683e-33	4.7333545990378e-32	64.3853347862007
C1orf198	1.03780490698241	10.6030853270874	16.2406857801652	5.14032259381005e-33	4.74399507917121e-32	64.3822894608165
FAM189A2	-2.63897364461263	7.33202522027588	-16.227153045237	5.52731617583025e-33	5.09706988470362e-32	64.3097289783333
DSG2	-1.07967018941244	9.48560920553589	-16.2215764538799	5.69517939582138e-33	5.24506431596744e-32	64.2798220240468
C1orf109	1.08398719563802	7.03729175439453	16.2215200416006	5.69690337780102e-33	5.24506431596744e-32	64.2795194698603
LOC100506542	-2.48040685290528	8.54173868875122	-16.2189680722813	5.77544303897539e-33	5.31313103832955e-32	64.2658321922483
PSMD14	1.1580051085205	8.90402662173462	16.2138816867354	5.93523990327593e-33	5.45578232576249e-32	64.2385495548911
PTN	-2.29941987280273	8.01332037286377	-16.2099115473592	6.06304685375913e-33	5.56882399069972e-32	64.217252240631
USP53	-1.32268850610352	9.67984988104248	-16.2063248664645	6.18088375009427e-33	5.66802283113259e-32	64.198010388807
PRR11	1.91661486612956	6.23654067193604	16.2059084045265	6.1947143519118e-33	5.67619016967308e-32	64.195776055293
ECE1	-1.32388133129883	8.48257757342529	-16.2053764412832	6.21242592698906e-33	5.68789782846727e-32	64.1929220241673
CENPW	2.04835566113281	8.69462132763672	16.2023729321053	6.31338515850427e-33	5.77574529540307e-32	64.176807316613
HMGB1	1.12134238492838	13.2021884139404	16.1828200296964	7.01213620255159e-33	6.40990436215798e-32	64.0718750247522
MEST	1.39069405989583	8.36297282641602	16.1802364601269	7.11009534415587e-33	6.49430024026028e-32	64.0580068114839
CALM1	-1.26102251123047	9.17967359875488	-16.1720916011951	7.42800241301632e-33	6.77393859294613e-32	64.014281439719
PTPLAD1	1.13124431144205	10.9635340908813	16.1665071629614	7.65418187675848e-33	6.96917492048934e-32	63.9842972121746
TACSTD2	4.07877848291015	5.22438175305176	16.1622509537817	7.8311983008009e-33	7.12472161115485e-32	63.9614421833167
HMGB3	1.66981016101074	7.46965767929077	16.1587309381562	7.98069764943233e-33	7.255008028786e-32	63.9425388109155
ZNF142	1.08304706176757	6.67159402349854	16.1583393587336	7.99750462049353e-33	7.26455758553419e-32	63.9404358431865
TMEM9B	-1.12290319181316	13.3407958504028	-16.1490747301467	8.40568606956564e-33	7.6293183719593e-32	63.8906752791393
LOC100133445	-1.37022627994792	8.41084823071289	-16.1433826268196	8.66677649089818e-33	7.86010484741017e-32	63.8600979885964
TRANK1	-1.77392729964193	7.55725572814941	-16.1334213894218	9.14343454151017e-33	8.27287048351553e-32	63.8065785424097
EXOSC5	1.92166828092448	6.79105253833008	16.1293120230463	9.3476615779836e-33	8.45101921642486e-32	63.7844965658212
PNO1	2.08958731241862	6.10191140313721	16.1195227151413	9.85281270002058e-33	8.87985707530393e-32	63.7318852709169
UGT1A8	-2.1761071949056	8.13946781317139	-16.1164668424487	1.00160484969608e-32	9.01992117378651e-32	63.7154596687373
CCDC34	1.3559536422526	8.73261260644531	16.1112976746668	1.02983752836557e-32	9.26692989029658e-32	63.6876724900605
ACSF2	-1.51769234700521	9.21227327368164	-16.1046244867238	1.06746961796957e-32	9.59806730603374e-32	63.6517958674376
TCFL5	1.96085814355469	6.43921643188477	16.1012611058872	1.08695692078385e-32	9.76566829764259e-32	63.6337116259628
CTBS	-1.08559146211752	8.89195003933716	-16.0950641598546	1.12380193976786e-32	1.0080984404439e-31	63.6003884939954
ANO10	-1.07199818701172	10.694451178833	-16.0940838898939	1.12974409654219e-32	1.01264076211834e-31	63.5951168424199
ZWILCH	1.50296498071289	6.5617376116333	16.0880574921902	1.16697406831717e-32	1.04519891884165e-31	63.5627059565205
EIF2C2	1.35741643416341	7.80110307843018	16.0820542452077	1.20528576150735e-32	1.07867460969683e-31	63.5304154820255
ACVRL1	-2.19261718522137	12.5204333874512	-16.0773110593289	1.23644700560516e-32	1.10570400571068e-31	63.5048997779696
KIF21B	1.57195011376953	6.74573232629395	16.0747985019218	1.25328012456193e-32	1.11971753063472e-31	63.491382582117
FAM129A	-1.9725063487142	8.67488960943603	-16.0746828706942	1.25406032102839e-32	1.11971753063472e-31	63.4907604855963
ATP2B1	-1.29628686954752	7.8720009944458	-16.0538491132948	1.40289668734662e-32	1.25067208933059e-31	63.3786500598477
MTHFD1	1.27675386714681	10.2666748484192	16.0536353132666	1.40451261496068e-32	1.25114504734558e-31	63.3774993063816
LIMK1	1.46482928605143	6.82446617559814	16.0495148896505	1.43602292110353e-32	1.27822673448343e-31	63.3553206015344
NUP43	1.11313679207356	9.86596150360107	16.0459095039503	1.46417624606786e-32	1.30228083244014e-31	63.3359125787254
MTFR1	1.09624759444173	7.20995823239136	16.0438704969906	1.48034283436211e-32	1.31564470714665e-31	63.3249358226511
ARRDC4	-1.97090095092773	9.1649675425415	-16.040031646383	1.51126766970929e-32	1.34209417786895e-31	63.3042685429948
FAM86B2	1.44290831648763	7.72430237420654	16.0299196915125	1.59586728862147e-32	1.41613258167357e-31	63.2498206849754
ABCA5	-1.71331793440756	8.98162847229004	-16.0194130465429	1.68881008554521e-32	1.49745491200612e-31	63.193235386802
ANKRD16	1.14938555151367	8.87084783343506	16.0077313966819	1.79854200158475e-32	1.59352756743024e-31	63.1303072832739
FLNB	-1.16707969344077	11.1063673154907	-16.0004375273581	1.87065882484694e-32	1.65487983683888e-31	63.0910079988281
USP36	1.21495358984375	8.44150497241211	15.9825776462856	2.05974427208772e-32	1.82075707241987e-31	62.9947538728285
TRMT11	1.00965886197916	6.83370724145508	15.9816736069302	2.06981018211049e-32	1.82825302445882e-31	62.9898806846491
AXIN2	1.66531551432291	8.94519338671875	15.9726846107222	2.17262356535441e-32	1.9175981499112e-31	62.9414208594816
MLLT1	1.01091270987956	8.82261003741455	15.969887066407	2.20565551915911e-32	1.94526328763176e-31	62.9263373996748
GARS	1.49195405948893	7.75541182623291	15.9587690214061	2.34199147338148e-32	2.0639247487514e-31	62.8663837867628
HAUS7	1.68929672167968	7.15221131445313	15.9539209482291	2.40406049022838e-32	2.11700575025688e-31	62.840236401949
MT1M	-4.81696941585286	11.5987950406494	-15.9528029846053	2.41860632646067e-32	2.12818894084826e-31	62.8342064519324
SPARCL1	-2.29937951041667	9.88668065917969	-15.9502136919606	2.45263583765856e-32	2.15648614040353e-31	62.8202400699113
PLD1	-1.18118492309572	7.32951360858154	-15.9487348897687	2.47228606237559e-32	2.17210681714965e-31	62.8122632234866
XLOC_l2_014191	1.80745545296223	7.39744983947754	15.943352018858	2.54515752188509e-32	2.23442732328785e-31	62.783225265174
AP3M2	1.4391424518636	6.46592932553101	15.9419962241013	2.56384930024198e-32	2.24741375542884e-31	62.775910902925
TOMM5	1.07539129833984	11.9017716290283	15.9385651266626	2.61177040752772e-32	2.28768066014985e-31	62.7573995928275
OAF	-1.57628164921061	9.62348101290894	-15.9280498942317	2.76430730925259e-32	2.41756302031481e-31	62.7006600482205
ASF1B	1.84878597355142	7.92436726495361	15.9279134173984	2.7663447764338e-32	2.41756302031481e-31	62.6999235462837
ASB2	-2.04045308048503	8.24485859161377	-15.926385446311	2.78925908999739e-32	2.4357416310909e-31	62.691677655306
PPP1R14B	1.03469700423177	11.8898897678223	15.9193142345374	2.89780948641293e-32	2.52861846706145e-31	62.6535135567938
CDS1	-1.15915370857748	9.46054055780029	-15.9076385671078	3.08640516434937e-32	2.69114919284835e-31	62.5904864730014
ZDHHC9	1.34037684773762	10.1009985792847	15.904164872786	3.144858622759e-32	2.73797472390808e-31	62.5717319860362
GLOD5	-1.47345561279297	7.85128275598145	-15.9021016965066	3.18010137897873e-32	2.76656819588587e-31	62.5605922526429
MRPS23	1.3207251463623	7.96742301327515	15.8934900584753	3.33153633984757e-32	2.89612514249042e-31	62.5140901966758
KIAA1704	1.09869309586588	7.02978347424316	15.8913243511448	3.37074614384831e-32	2.92800232103538e-31	62.5023942732359
GBA2	-1.00267083186849	8.11286009020996	-15.8904847309502	3.38607165737224e-32	2.93874750162948e-31	62.4978597554828
PDE6A	-3.35350573242188	7.69736243164062	-15.8903676104591	3.38821499927611e-32	2.93874750162948e-31	62.4972272192516
KIF5C	-3.42410736499023	6.16055317730713	-15.8840754574514	3.5053880264902e-32	3.03580824803551e-31	62.4632427465925
QTRTD1	1.04387238118489	8.24855695336914	15.8839294824418	3.50815413287109e-32	3.03592287459497e-31	62.4624542703118
C7orf44	1.19871213224283	8.39933621136475	15.880758126075	3.56879260938073e-32	3.0837685463517e-31	62.4453237705594
PPP2CB	-1.25384984407552	9.90203867602539	-15.8776503827493	3.62923542879126e-32	3.13364769945145e-31	62.4285357976517
UBQLN4	1.0928724214274	7.03225951547241	15.8747952597327	3.68567036865258e-32	3.1799941870852e-31	62.4131115266355
KIAA0247	-1.37555154329427	11.214647392334	-15.8741645655913	3.69825511624835e-32	3.18846572363461e-31	62.409704196402
ACADSB	-1.01788751700847	9.42200428155517	-15.8646665835261	3.89307731000642e-32	3.3539239276864e-31	62.3583859148802
OSBPL1A	-1.999415025472	8.41883667877197	-15.8613055142077	3.96446023222382e-32	3.41287028355818e-31	62.3402234098407
MLXIPL	2.56525511287435	7.39305946710205	15.8606265484559	3.97903896421142e-32	3.42286433884068e-31	62.3365542704681
NAT1	-1.56704981355795	9.67653929229736	-15.8600548299468	3.9913566160776e-32	3.4308999040661e-31	62.333464656758
LOXL2	2.27008080045573	6.64415690136719	15.8564423706686	4.07007685307861e-32	3.49595945495061e-31	62.3139417899524
PALM	-1.93689133658854	8.83502751367187	-15.8524512523997	4.158862086312e-32	3.56956092843771e-31	62.2923708435267
SSFA2	-1.04852887524414	11.1588820282593	-15.8517308005586	4.17509498214807e-32	3.58082737047774e-31	62.288476801789
LBR	1.04649377897135	11.9701797094727	15.8470369184899	4.28242383824188e-32	3.67014866791184e-31	62.2631049599726
FAM55D	-2.5618604194336	10.8027041258545	-15.8406892220296	4.43198740875208e-32	3.78987528640098e-31	62.2287898614826
KIFC1	2.23150458524576	6.55151925979614	15.8329499055627	4.62145299962993e-32	3.94896135854219e-31	62.1869457328204
CBFA2T3	-1.64234914152018	7.553175277771	-15.8276436360665	4.75603344490123e-32	4.06041647613173e-31	62.1582525078552
PRIM1	1.38984869580078	7.37744942468262	15.8275309577261	4.75893351197533e-32	4.06041647613173e-31	62.1576431749391
HIST2H3D	1.01134210351562	12.2429980251465	15.8264072336493	4.787952747627e-32	4.08215468357222e-31	62.1515663127265
BLM	1.68260100488281	7.34029788232422	15.8144947042103	5.10672431507295e-32	4.35071775165158e-31	62.087137264709
MGC27345	1.28832902779134	6.48285363845825	15.8139017888004	5.12313559081689e-32	4.36147591989264e-31	62.0839300643189
C16orf54	-1.835225379069	6.98778759924316	-15.8034398608647	5.42157781208599e-32	4.61214224648821e-31	62.0273329590828
TCEB1	1.07082437748209	12.6465709790955	15.8020931272739	5.4612424784727e-32	4.64245885319726e-31	62.0200464980299
C6orf105	-2.36268916023764	8.34946195709228	-15.7988311127366	5.55852848101031e-32	4.72167706710434e-31	62.0023966361736
GRINA	1.55423780887857	8.17360892556763	15.7876613193331	5.90502572148341e-32	5.01231454282322e-31	61.9419510492553
MSH6	1.23674169392904	9.93244410894775	15.780789224223	6.12889495176934e-32	5.19468912566509e-31	61.9047557024727
CCL28	-2.10390553141276	10.7751659127197	-15.7723873525755	6.41420854294472e-32	5.43251887395473e-31	61.8592733263877
GTSE1	2.05048598429362	6.53262736627197	15.7682365685773	6.56004513415605e-32	5.54788263106506e-31	61.8368007537852
RUNDC3B	-2.84317686954753	6.30911747857666	-15.763845044113	6.71796550912372e-32	5.67727187856812e-31	61.8130227305449
BEST2	-3.43199039534505	10.0617709656982	-15.7599870822255	6.85984476942533e-32	5.78868452834303e-31	61.7921319415146
EXOSC4	1.06104928279622	10.317054968811	15.759534010344	6.87670295119443e-32	5.79866531956241e-31	61.7896784584079
LOC344887	-1.86587272989909	7.40966871368408	-15.7536844850309	7.09812715747713e-32	5.9810023204853e-31	61.7579999715319
ADAMTSL1	-1.71151071557617	6.59516874859619	-15.7461051035709	7.3957115493973e-32	6.22719992913825e-31	61.7169477313524
PYROXD1	-1.06867759903972	8.99910661065674	-15.738995639095	7.68622042912863e-32	6.45765764479342e-31	61.6784349586508
ZNRF3	1.68409617789713	9.6722340423584	15.7301923371505	8.06186833539409e-32	6.76832893678716e-31	61.6307387747739
NT5DC2	2.13234780379231	6.96298567303467	15.7286518350362	8.12947327243703e-32	6.82011924391423e-31	61.6223914772582
SNAR-A3	4.62890385367839	13.0971036143799	15.7218845145351	8.43326276941452e-32	7.06983417767572e-31	61.5857192820805
THOC4	1.12349826961262	10.2157633019409	15.7194911765322	8.54340749222369e-32	7.15696643625454e-31	61.5727485495727
IL2RG	-1.74749186983236	9.81065461380005	-15.69241419358	9.89480558129304e-32	8.27702641041835e-31	61.4259606628435
NTHL1	1.2307780234375	9.09608435571289	15.6859287909146	1.02491527612998e-31	8.56722145609154e-31	61.3907905202477
SHISA3	-3.87375696386719	5.93093809790039	-15.6844460320941	1.03319400767435e-31	8.63016472932046e-31	61.382748917643
KRT6B	5.08356333072917	3.88962283447266	15.6832784273621	1.03976034246267e-31	8.6787237274201e-31	61.3764163542697
FBXO8	-1.05090116585287	8.78669981262207	-15.6679810847276	1.12976022652428e-31	9.41630233633073e-31	61.2934366757139
RARRES2	-2.2851432319336	10.7615225321045	-15.6674032647144	1.13330894465226e-31	9.43905506142097e-31	61.2903018185521
SLC2A10	-1.81393039436849	8.69346904675293	-15.6615393515098	1.16996161692406e-31	9.73729065580048e-31	61.2584861643886
GLTP	-1.59390797827149	7.49717510870361	-15.6582412145371	1.19109719032812e-31	9.90604423731043e-31	61.2405899147931
AKAP7	-2.27254649763998	9.75600156756592	-15.6541321950357	1.21796616813873e-31	1.01222033310275e-30	61.2182920192385
CEACAM7	-2.94405720654297	13.1844893431396	-15.6501420695629	1.24463984262033e-31	1.03364290100033e-30	61.1966375488876
TBX10	-2.3303395476888	8.66984122277832	-15.6449413409654	1.28028849575471e-31	1.06248275670011e-30	61.1684105124392
MOB3A	-1.01075989444987	8.39428398162842	-15.6308035148195	1.38246327030064e-31	1.14480273827266e-30	61.0916623502295
SNAR-H	4.91442171484374	11.6461340668945	15.630225046204	1.38681391983876e-31	1.14758105197282e-30	61.0885216302951
SLC35A3	-1.10331412076823	7.58510892626953	-15.630003783298	1.38848166442339e-31	1.14813688276962e-30	61.0873203025685
CCDC96	-1.07800947953288	7.53736417410278	-15.6270822638283	1.41069199527291e-31	1.16566642505454e-30	61.0714576670881
EPHB4	1.74309345564779	7.23687356085205	15.6233254020915	1.43977781939674e-31	1.18884806047179e-30	61.051058106466
ALDH6A1	-1.1065105374349	8.81540111230469	-15.612454688647	1.52737509942376e-31	1.26027578890893e-30	60.992022067072
ZFYVE28	-1.54852718513998	7.89758893914795	-15.6076296799128	1.56795090844229e-31	1.29283048080216e-30	60.9658145775893
TGDS	1.21926840673828	7.10280554821777	15.6018486498491	1.61799371756598e-31	1.33313892654632e-30	60.9344110413712
ZNF783	1.24800152913411	6.42742957971191	15.5940073961614	1.68844248572333e-31	1.38919889599806e-30	60.8918102288701
ANKRD35	-1.6655154971517	7.7862092600708	-15.5914359026348	1.71220976929991e-31	1.40774907351783e-30	60.8778380891628
UPF3A	1.0179588758138	6.79844348034668	15.5910018643597	1.71625440605591e-31	1.41006874829697e-30	60.875479683403
PBX4	1.79275777050781	6.55364692919922	15.5830509249964	1.79206655690286e-31	1.47025987198714e-30	60.8322735671659
MUC13	-1.46251242464194	11.3511360684814	-15.5804408181037	1.817679672683e-31	1.49021291515056e-30	60.8180885205176
EEPD1	1.76498442301432	7.3703963092041	15.5760842255661	1.86125227469862e-31	1.52268665510653e-30	60.7944102740323
CLCA1	-4.32227065445965	11.1856594127197	-15.5589626485537	2.04289365850629e-31	1.66891815744876e-30	60.701333971656
GDPD2	-2.45710211470541	7.3852530328064	-15.5561977443339	2.07385152767911e-31	1.69300896314144e-30	60.6863004319903
ZNHIT2	1.03659526326497	7.34016952178955	15.5537098220901	2.10211039219001e-31	1.71407065043579e-30	60.67277221373
SNAR-D	4.77481251383463	12.3648230489502	15.5517731089471	2.12437566160814e-31	1.73057796829379e-30	60.6622407638694
SOX9	1.7075001340332	6.54435855401611	15.5489874850638	2.1568160909721e-31	1.75576405936691e-30	60.6470924015202
CLSTN1	-1.05314130297852	11.198940343689	-15.5471773763067	2.17816205539092e-31	1.77188948570862e-30	60.6372484907358
PCMTD2	1.20264043636067	7.32657791369629	15.5412638767353	2.24938693437669e-31	1.82853901216926e-30	60.605086655912
SMAD7	-1.43396292879232	9.16334467974854	-15.5378951146532	2.29100221028384e-31	1.86105584763508e-30	60.5867632363571
FERMT1	1.47363112337239	9.08787745898437	15.5342078099119	2.33743890827041e-31	1.89610543952379e-30	60.5667057936377
RSPO3	-1.94291250610352	7.15064548626709	-15.5304162216169	2.38617432070578e-31	1.93291858009666e-30	60.5460795639741
MORC4	1.08615065478515	8.36429313659668	15.5301297943838	2.38989709973722e-31	1.93457470987857e-30	60.5445213377625
CXCL2	3.52392269034831	8.86990867242432	15.528965627386	2.40508821379049e-31	1.94550539230617e-30	60.5381879261647
HMGA1	1.73400916739909	10.6688383019409	15.5211325600182	2.50985215133969e-31	2.02740474761686e-30	60.4955699396736
NEU4	-2.37388282804362	9.6121998661499	-15.517480269225	2.56025386361943e-31	2.06666990797907e-30	60.475696377973
TMEM63A	1.32523535514323	7.89769975732422	15.5164385283327	2.57481523774987e-31	2.0769695763151e-30	60.4700275900933
XLOC_l2_004611	-1.21846054720053	7.05479900341797	-15.5159770570935	2.58129218546181e-31	2.08073811341386e-30	60.4675163884897
BAD	-1.06118348429363	10.7332523434448	-15.5128959788146	2.62495752989569e-31	2.11445740371123e-30	60.4507494078503
MGAT4A	-1.32653792488607	9.42390846856689	-15.5106693992467	2.65697359343797e-31	2.13875241700834e-30	60.4386319057877
FAM107B	-1.43610914095052	9.08456651635742	-15.5085702919077	2.68751556858495e-31	2.16032022029838e-30	60.4272076460926
PIP5K1B	-1.13311585864258	8.62379602923584	-15.5068934889946	2.71216599695958e-31	2.17861584996189e-30	60.4180814117475
NUSAP1	1.62987196472167	8.56096422128296	15.5058034217076	2.72831249724627e-31	2.18853571021279e-30	60.4121484061967
TTR	-3.43415280712891	7.38757809460449	-15.5033158514804	2.76552158135336e-31	2.21684056107511e-30	60.3986086102586
LOC128322	1.30352915885416	6.41907512963867	15.5007475351842	2.80447295391129e-31	2.2465017192311e-30	60.3846286183035
ACVR1C	-1.57657693717448	8.24834423632812	-15.4955871198702	2.88440904985645e-31	2.30892938317329e-30	60.3565370398123
IDH3A	-1.07127312662761	9.61990871459961	-15.4896054217643	2.9799332483111e-31	2.38373980244844e-30	60.3239710988769
AGR3	-2.49859975244141	11.2431787950439	-15.4838653231189	3.07458355392546e-31	2.45774789362682e-30	60.2927168841938
RCC1	1.44188238623047	7.6634565567627	15.4827900295781	3.09264713780225e-31	2.4704742590053e-30	60.2868616350108
CCNO	3.24845065055338	6.31498480407715	15.4778016487343	3.17784894869671e-31	2.53677734291046e-30	60.2596970024934
C9orf7	-1.21011794303386	12.7314250739746	-15.4696241711581	3.32264769011968e-31	2.64869709018047e-30	60.2151601250523
ENOX2	1.31334522155761	7.44179864144897	15.4688714785137	3.33630395961372e-31	2.65774538648703e-30	60.211060386605
NPEPL1	1.38259639379882	9.49098313800049	15.4683757247586	3.34532928577145e-31	2.66309466001985e-30	60.2083601003097
C11orf54	-1.13434751859538	9.72585997476196	-15.4641745963749	3.42280230803944e-31	2.72100980722556e-30	60.1854762147665
FAM177A1	-1.16860552693685	11.4963622645874	-15.4570046167781	3.55920615542324e-31	2.82554885355122e-30	60.1464164016663
PDDC1	1.13345864990235	8.89828142687988	15.4507853093269	3.68193554557709e-31	2.92096841251666e-30	60.1125311086143
HMOX1	-1.69635359448243	11.3105720105591	-15.4398494367583	3.9081316591055e-31	3.09615351439925e-30	60.0529380623045
SLC35D1	-1.1435934909668	7.55511646685791	-15.4383688162508	3.93981019517461e-31	3.11910660163308e-30	60.044868710624
PDCD6IP	-1.13605940100098	8.75544209347534	-15.4340962507502	4.03267591508721e-31	3.19043618896433e-30	60.021582006197
GRN	-1.18081154459636	15.7424255649414	-15.4331684311598	4.05313097808563e-31	3.20441980688567e-30	60.0165248670329
GBAP1	-1.16847557824707	8.54236484786987	-15.4315340706036	4.08941631013895e-31	3.22867820595697e-30	60.0076164588681
BCL2	-1.2087674144694	6.91750304498291	-15.4300138554821	4.12346004222077e-31	3.25332812502935e-30	59.9993299678983
PPARD	-1.39212185270182	10.7127105157471	-15.429824591137	4.12771829440229e-31	3.25446024484099e-30	59.9982982958395
MAPK3	-1.21597418619792	9.44861357275391	-15.4239546361408	4.26200024338519e-31	3.35574295119543e-30	59.9662995233633
LTK	-1.11800417944336	9.32108363409424	-15.4219479248106	4.30890463388549e-31	3.39035793275072e-30	59.9553595358619
KIF20B	1.28647715755208	6.97161066015625	15.421724282959	4.31416396674434e-31	3.3921806306045e-30	59.9541402811303
MARCH3	-1.35806808544922	8.68505917004395	-15.4187177197199	4.38549730586709e-31	3.44591870788889e-30	59.9377485284383
GINS2	1.99503763134765	8.33716735827637	15.4036503621106	4.76121755452611e-31	3.7335071259199e-30	59.8555869781573
PCBD1	1.03618612198892	11.7304907720337	15.4019290858928	4.80614565950798e-31	3.76617546003728e-30	59.8461994106698
MIPEP	1.28394761621093	8.26921909619141	15.3922096577659	5.0679417297078e-31	3.96593104673061e-30	59.7931852943827
IGSF9	-1.51626022444661	11.1967317386475	-15.3768136855775	5.512244623484e-31	4.30485391428862e-30	59.7091882788008
SNAR-G2	4.88171773364258	11.3006482859497	15.37572410248	5.54513095671776e-31	4.32760491117709e-30	59.7032428040607
FAM59A	-1.1047314058431	9.54360508465576	-15.3638869134651	5.91535067777938e-31	4.61149333721273e-30	59.6386433054358
HSP90AB5P	1.20514658764648	9.44798909173584	15.3638392768463	5.9168896033119e-31	4.61149333721273e-30	59.6383833065644
CKB	-3.0375091780599	13.6457118681641	-15.3615211077007	5.99226681334301e-31	4.66708510523006e-30	59.625730537084
SLC9A2	-2.17998984008789	6.67353268475342	-15.360415983816	6.02853931441626e-31	4.69216560953925e-30	59.6196984747397
CES3	-1.56867912386068	7.06288389294434	-15.3549538084714	6.21108161428866e-31	4.83098095599902e-30	59.5898825644689
REXO2	1.01249364086913	11.5889091829224	15.3373709569785	6.83721854975626e-31	5.31440446547811e-30	59.4938831878085
LMNB2	1.91168379899088	6.45845668127441	15.3340434031786	6.96265870748114e-31	5.40825922649159e-30	59.4757116452264
SNAR-B2	4.63721387565103	12.9331587189941	15.3226175512161	7.41123100181338e-31	5.74507463065923e-30	59.4133069850017
CHAF1A	1.08155306559245	9.19913873547363	15.3171655596712	7.63538355609492e-31	5.91088423445978e-30	59.3835249655458
SNHG1	1.63567485705566	10.2190946260071	15.3083466545824	8.01245796811707e-31	6.19447370881861e-30	59.3353442538008
HELLS	1.86315117456055	6.39059461590576	15.304468208088	8.18415440018652e-31	6.3187372920931e-30	59.3141523825895
SRPRB	1.14205358174641	10.0460990903015	15.3023483911311	8.27955298817809e-31	6.38811293806753e-30	59.3025690143209
H2AFX	1.33927095092773	10.1707223615112	15.3019102070992	8.29941143669042e-31	6.39487403948733e-30	59.3001745757058
SELENBP1	-2.01815338948568	15.4327177908936	-15.294715448584	8.63239845612219e-31	6.64700447586643e-30	59.2608562358065
CA9	4.03932272900391	3.18145698474121	15.2905637297029	8.83061499905154e-31	6.79509339746776e-30	59.2381652105262
KRT19	-1.30751463020833	16.9977636069336	-15.2790655343289	9.40374658990692e-31	7.22646579612381e-30	59.1753129448161
C11orf75	-1.15141267480469	11.5492544702148	-15.2740375695904	9.66596031673499e-31	7.42301962498362e-30	59.1478243762174
MMP1	4.33448815364583	7.03922596704102	15.2710902951138	9.82306214413887e-31	7.53864429663707e-30	59.1317099968552
MCM8	1.60859441715494	7.44566205163574	15.2664871097437	1.00735731488178e-30	7.72061686744833e-30	59.1065400220238
C6orf48	1.20857271484376	11.6686207126465	15.26016595578	1.04280590290078e-30	7.98699245364606e-30	59.0719726816619
PEX26	-1.73795438256836	8.60452888555908	-15.2599667462384	1.04394317673041e-30	7.99039375708597e-30	59.0708832330625
DES	-2.73907046476237	10.7222463500366	-15.2593238284665	1.04762204843382e-30	8.01323115613577e-30	59.0673671791356
LOC100510710	-1.24044301106771	8.42374042919922	-15.257523076501	1.05799562160639e-30	8.08721189009073e-30	59.057518814669
CCNA2	2.25578710506184	6.79949990338135	15.2557408827531	1.06836377975267e-30	8.16105320689793e-30	59.0477716127257
CTSE	-3.0538280099284	9.40374743225098	-15.2324574174754	1.21356873868448e-30	9.25185638281482e-30	58.920398927583
CENPJ	1.48773332930501	8.61077597250366	15.2206860242819	1.29435862906639e-30	9.85473706555369e-30	58.8559818184581
TMEM45B	-1.19892153898113	13.4986879454956	-15.218744397915	1.30819374039992e-30	9.95349785187453e-30	58.8453551894216
MIF	1.31861365917969	15.1138785007324	15.2046481510346	1.41318802919782e-30	1.07385117028045e-29	58.7681939239014
JOSD1	-1.14117997347006	12.202552961792	-15.2046425043537	1.41323173880059e-30	1.07385117028045e-29	58.7681630104808
SPON1	-2.81085299780274	10.5136278853149	-15.2038635638275	1.41927435072502e-30	1.07773224247743e-29	58.7638985770473
SLC1A1	-2.28846262491862	9.99591730340576	-15.1962651862341	1.47959582409134e-30	1.12279796341678e-29	58.7222967587981
C9orf46	-1.04057533935547	10.6103983394775	-15.1931291821424	1.50523566372167e-30	1.14096344788631e-29	58.7051251053332
SLC31A2	-1.73433061140951	9.41007599346924	-15.1930954951763	1.50551349374085e-30	1.14096344788631e-29	58.7049406418539
IL6ST	-1.03565429370118	7.98110849298096	-15.1928739624616	1.50734184591124e-30	1.14159851891057e-29	58.7037275675241
C14orf129	-1.31863962654624	12.1869544230347	-15.1892390523439	1.53766168352879e-30	1.16379686316719e-29	58.6838227118656
BCL2L11	-1.19783822387696	8.92934771722412	-15.1658633691473	1.74781743529223e-30	1.32198763626073e-29	58.5557843001594
RCAN1	-1.69181414900716	9.81601767767334	-15.1656130401102	1.75021739875486e-30	1.32293481675064e-29	58.5544128380727
GDPD3	-1.77336832413737	8.33532110003662	-15.1612168831152	1.79290749872756e-30	1.35431485831144e-29	58.530326834533
KRTAP13-1	-3.47993368579102	7.13922472381592	-15.1582858516613	1.82194912970348e-30	1.37535085907609e-29	58.5142669676235
NANOS3	3.43972963094075	5.12732979632568	15.1551763132164	1.8532757143279e-30	1.39808306014776e-29	58.4972280485958
ZNF511	1.04758112145996	9.9714403822937	15.1381982568591	2.0341003266835e-30	1.53248852716867e-29	58.4041781413992
SNAR-F	5.12715116084797	10.2429720375671	15.1374310879898	2.04267676420203e-30	1.53794481129698e-29	58.3999728975455
FAM108C1	-1.17554027685547	10.4730244483643	-15.1354186114898	2.06534775524964e-30	1.55399892785656e-29	58.3889412002654
TMEM50A	-1.1669493980306	10.1418091569214	-15.11721424569	2.28224702495474e-30	1.71272535525087e-29	58.2891323141715
VRK1	1.35170950895182	7.59338507556152	15.1163028906324	2.29368737134494e-30	1.7201909127842e-29	58.2841347447085
CD44	1.58674221533203	11.2892469981689	15.1156273448742	2.30220469768674e-30	1.72545601757055e-29	58.2804302205075
OTUD6B	1.51782132527669	7.08585204559326	15.1143988469906	2.31777510050097e-30	1.73439592412322e-29	58.2736933252372
E2F3	1.06555067675781	8.15532512695312	15.1143303185112	2.31864675897795e-30	1.73439592412322e-29	58.2733175209454
AGT	2.54187451481119	7.28911878283691	15.1129364015052	2.33644846769885e-30	1.74657856596398e-29	58.2656732955499
ADRM1	1.22262221842448	9.49763215161133	15.1122913369149	2.34473294102976e-30	1.75163555484446e-29	58.2621357011909
ITFG1	-1.01427191455078	10.0145757657471	-15.1118698402584	2.3501620790538e-30	1.75455429308635e-29	58.2598241512252
KRTAP13-2	-3.22698695263672	7.80039672717285	-15.104743991792	2.44388053674648e-30	1.8233405143739e-29	58.2207421942795
MKI67	1.77928849584961	7.58574288275146	15.0971788692583	2.5474841866206e-30	1.89940816424163e-29	58.1792453434157
BUB1B	1.99673210148112	7.5278513850708	15.0960946967015	2.56268862137024e-30	1.90950948536101e-29	58.1732978693354
FOLR2	-2.15457431363933	8.03063531506348	-15.093565843455	2.59850811248039e-30	1.93494851502335e-29	58.1594248057453
TTPAL	1.13233628035482	8.98705770013428	15.0916345719997	2.62620123792344e-30	1.95304655932538e-29	58.1488295830045
DACH1	2.25101361108398	7.81352076507568	15.0908071061943	2.63815698184824e-30	1.96067282590359e-29	58.1442898744918
WDHD1	1.67685172355143	6.51411814190674	15.0906732636651	2.64009594744627e-30	1.96084961251374e-29	58.1435555704319
HEATR2	1.36227495768229	7.72326173632812	15.0893820192983	2.65887569860825e-30	1.97311158523983e-29	58.1364712860055
TNFRSF12A	2.46573981201172	10.0763143233643	15.0893030214458	2.66002897845294e-30	1.97311158523983e-29	58.1360378665846
IVNS1ABP	-1.47889695222982	10.2978241624146	-15.0811781077274	2.78136440376206e-30	2.06046192044764e-29	58.0914573651042
XLOC_003474	-3.71077336645508	7.67646186151123	-15.0708132491105	2.94424683346703e-30	2.17972596335096e-29	58.0345767710201
FAM132A	-2.11828633040365	9.46142658276367	-15.0560429249703	3.19303913875966e-30	2.3623980842415e-29	57.9535008414579
NAA11	1.28788538256835	8.1391527711792	15.0533998675931	3.23973482216443e-30	2.39387328814676e-29	57.9389904714223
PRKCD	-1.00808082047527	9.83339799938965	-15.0505290322066	3.29123143057643e-30	2.43036673287986e-29	57.9232287979866
TMEM158	2.29573707039388	6.22813025238037	15.0468724923232	3.35801297045549e-30	2.47650771020092e-29	57.9031521805498
FOXO1	-1.13007546313477	8.78943307244873	-15.0394257627901	3.49825107965193e-30	2.57498979534788e-29	57.862260935495
ACADM	-1.1333765292155	8.56612887078857	-15.0373903068806	3.53759571578947e-30	2.60228882041514e-29	57.8510829266046
SFXN3	1.21570981217447	7.46817056982422	15.0354394565509	3.57572161803936e-30	2.62698171390311e-29	57.840369148009
FXN	1.42062178792317	7.34132801135254	15.0338679750741	3.60673305548074e-30	2.64807719302717e-29	57.831738526235
E2F5	1.79166861035156	6.49326310375977	15.0229665487256	3.82941999298643e-30	2.80799772640932e-29	57.7718606974772
TATDN1	1.05295953133137	6.97880297039795	15.0029869898106	4.27398476005742e-30	3.12801411613854e-29	57.6620886033735
WDYHV1	1.33862794681803	6.46862613510132	15.0000758341159	4.34294824612292e-30	3.17549302090679e-29	57.6460907121102
TMEM61	-2.18573920003256	9.09071380163574	-15.0000164086579	4.34436756655679e-30	3.17549302090679e-29	57.6457641380598
STIP1	1.32500391878255	6.85408612268066	14.9983531978704	4.38428113342205e-30	3.20263679499088e-29	57.6366237783732
PCOLCE2	-4.63962103653972	7.31559369171143	-14.9948902771416	4.46856849125272e-30	3.26213989858582e-29	57.6175920187668
SEMA6A	-2.20845344010417	6.46546040673828	-14.9853103580357	4.71031129351774e-30	3.4299278762084e-29	57.5649357476707
GPC4	1.45858496931966	8.4661221885376	14.9812276591241	4.81728322429167e-30	3.50560755848548e-29	57.5424922835101
CGREF1	3.65110083992513	6.02341817767334	14.9779440905603	4.9050829883663e-30	3.56724868182324e-29	57.5244405935449
PPP1R14D	-1.20252503084311	9.26842899017334	-14.9658037297075	5.24388109036696e-30	3.80883537042596e-29	57.4576885554733
F12	1.69459001542154	10.0579572098694	14.9653524656924	5.25691733225569e-30	3.81554032367915e-29	57.4552070598103
PAFAH1B3	1.58891716910806	9.2968515826416	14.9652551653043	5.2597324319651e-30	3.81554032367915e-29	57.4546720034127
MSTO1	1.11857230818685	8.55306633746338	14.9598783111854	5.41767018686144e-30	3.92517185694229e-29	57.4251031211749
CHRNA7	-2.70144500309245	7.41384766418457	-14.9588705821265	5.44779611254322e-30	3.9445192078697e-29	57.419561004111
IL23A	2.93821934057617	5.20836525262451	14.9547927446948	5.57142855886757e-30	4.03150389190624e-29	57.397133449161
NAT9	1.13853217211914	9.85065332989502	14.950702774143	5.69825683608816e-30	4.12069049871946e-29	57.3746374917145
TOP2A	2.40556300919596	7.2285629899292	14.948974177516	5.75272703194338e-30	4.15747238227031e-29	57.3651292339964
ZG16	-4.26336591113281	15.0573048059082	-14.9439212866902	5.9149639633652e-30	4.26936691331939e-29	57.3373337674129
CEP78	1.29919933382161	6.46266499572754	14.9421706619103	5.97223689345612e-30	4.30800842746362e-29	57.3277031535597
WFS1	1.6909897199707	7.41298152276611	14.9416422642417	5.98963287176721e-30	4.31785479129835e-29	57.3247962489551
SMCHD1	-1.13694500394693	8.16772920095825	-14.9393076972456	6.06710236814625e-30	4.37096806235136e-29	57.3119526268886
FBXO41	2.13690859318034	7.11467429193115	14.9293879415704	6.40764735387118e-30	4.60479744688735e-29	57.2573730155829
LEPREL1	-2.05764513090007	11.2356707762756	-14.9292454443927	6.41267650851717e-30	4.60554031860918e-29	57.2565889085543
CPNE1	1.63091571818034	10.1112332333374	14.9236406996268	6.61365809988349e-30	4.74397242796248e-29	57.2257465532832
DOCK10	-1.58963023535156	7.60992960791016	-14.9230664009066	6.63460567538003e-30	4.75603853358866e-29	57.2225860674707
SRM	2.04408033976236	8.42870682623291	14.9206139452835	6.72481084377864e-30	4.81471395007679e-29	57.2090893221635
SECTM1	-3.3525438470866	11.4761866296997	-14.9177966138862	6.82995657921309e-30	4.88695899991243e-29	57.1935837948976
POLD2	1.84728624845378	7.84942569866943	14.9092592840962	7.15875936203797e-30	5.11904585398335e-29	57.1465927341066
HMGCL	-1.07706654817709	10.1798451745605	-14.9029114838746	7.41348952136043e-30	5.28807510598525e-29	57.1116485557634
LIN9	1.05914026407877	7.84392629315186	14.8940760292356	7.78325715161041e-30	5.54154448342268e-29	57.0630033585985
OGFOD1	1.24294504134114	8.24141611743164	14.8882072130275	8.03904253262597e-30	5.72012612799874e-29	57.030687245895
CNN1	-2.94653938753256	10.3268378841553	-14.8860723201502	8.13416705035486e-30	5.7806746972528e-29	57.0189308018105
CXCL3	3.9856857668457	7.17024593927002	14.8843802061059	8.21036429973161e-30	5.83123039328442e-29	57.0096123346834
KLHL23	1.33142146736653	6.48204913946533	14.8833249874486	8.25824377182627e-30	5.85801698202101e-29	57.0038011050072
MT1L	-3.14315227286784	13.3909960039673	-14.8709979712848	8.83876113449941e-30	6.26210200352641e-29	56.9359064205515
ASPHD1	2.27169477954101	7.17740167999268	14.8611971019747	9.32939964054593e-30	6.59754537770386e-29	56.8819145149913
NOTCH4	1.36584969360351	6.44419465093994	14.8586243741105	9.46266015505598e-30	6.68768139836482e-29	56.8677400698082
TIPIN	1.64293193139648	7.78645081097412	14.846071166278	1.014079198076e-29	7.15378881041743e-29	56.7985688029808
XDH	-2.14128577319336	11.7768179678345	-14.840114789234	1.04794092550623e-29	7.38814376043441e-29	56.7657422677046
TXNIP	-1.87765772851563	13.6418551745605	-14.833820889206	1.0849550228525e-29	7.64442331810564e-29	56.7310517967935
MT1B	-3.07255567911784	13.2440700471802	-14.8327301419808	1.09150173326036e-29	7.68585246138799e-29	56.725039463096
TMCO7	1.02546385457357	6.58279916888428	14.8313172783271	1.10004075395786e-29	7.74125138636893e-29	56.7172514099586
ZW10	1.00209910986328	7.20278427355957	14.8309426759399	1.10231598335777e-29	7.75224492051336e-29	56.7151864762538
IMPDH2	1.047660984375	10.614714692627	14.8308387549408	1.10294800638865e-29	7.75224492051336e-29	56.7146136264906
PLAC8	-2.60461635538738	12.9178751154175	-14.8278638311756	1.12119578758848e-29	7.87570008746641e-29	56.698214331417
ALDH1B1	1.56564245198568	8.23678096325684	14.8277478046475	1.12191358349027e-29	7.87594267776638e-29	56.6975747164828
UBTD1	1.37177889168294	6.78119881878662	14.8245655383368	1.1417813688537e-29	8.00079868618641e-29	56.6800314453154
HIST1H2AM	1.05597180777995	10.5204900008545	14.8243213126968	1.14332064456628e-29	8.00671753943831e-29	56.6786850314933
WDR78	-1.83815642309571	6.7266307243042	-14.8236584632728	1.1475088730074e-29	8.03116865765408e-29	56.675030718896
SAA2	4.39188903035482	4.39731051507568	14.8138441478383	1.21135296396421e-29	8.47285534928124e-29	56.6209190032
MT1H	-3.71482662166342	11.9191095253296	-14.7991560617447	1.31362216690643e-29	9.17148559535461e-29	56.5399178818141
MT1E	-3.63252573453776	13.8468078929443	-14.7954358930823	1.34087184023083e-29	9.35607124839028e-29	56.5193987324693
TAX1BP3	-1.46781543025717	9.96325142694092	-14.7938043477585	1.35300087822221e-29	9.43499160512244e-29	56.5103992724112
NPY	-3.11033364404297	6.94863989245605	-14.7829112152502	1.43685127000374e-29	1.00076039814701e-28	56.4503070541255
CENPQ	1.11634110392253	6.76837001507568	14.7809459611244	1.45252493719083e-29	1.01045594152075e-28	56.4394644514334
KIF11	1.66981703035482	7.68620756219482	14.7784572685111	1.4726196211964e-29	1.02381703097292e-28	56.4257334195781
PDLIM2	-1.38546286857097	8.0197073460083	-14.7764958130913	1.48865353024599e-29	1.03434052098527e-28	56.4149109237944
ZP3	3.63298123974609	3.90335741003418	14.7752096606846	1.49926213662759e-29	1.04108401499435e-28	56.4078142659097
NARS2	1.09117793005371	7.92745118844605	14.7747807963085	1.50281638589376e-29	1.04292380976504e-28	56.4054478668652
PDE9A	-1.45610393937174	8.45390997161865	-14.7653893902232	1.5828034943135e-29	1.09711219957617e-28	56.3536232325334
GABARAPL1	-1.34242020528158	8.53621282998657	-14.764737462324	1.58851199221552e-29	1.10040731576132e-28	56.3500253776596
KIAA1430	1.12421828763834	9.28230492929077	14.7355868758378	1.86603596678141e-29	1.29032972939948e-28	56.1891071646503
MTHFD2	1.43654604191081	8.84021903179932	14.732635695595	1.89671308357106e-29	1.31075609798103e-28	56.1728113528178
VAMP8	-1.00841147965496	14.9300108033447	-14.7316262466682	1.90732188211558e-29	1.31650894222433e-28	56.1672371895596
EIF2B3	1.01700422810872	7.87357656427002	14.7221411426775	2.00995947343654e-29	1.38486568142875e-28	56.1148557629048
RRM2	2.75767676961263	5.84232149456787	14.7122640951971	2.12273271007894e-29	1.46169294797372e-28	56.0603005975996
TOM1L2	-1.06563924031576	10.1635444478149	-14.7116842023391	2.12954766899474e-29	1.46551020779119e-28	56.0570973084265
SMC2	1.36443023795573	6.9612435612793	14.7100555053572	2.14880590458589e-29	1.47788100609556e-28	56.0481003223962
ASXL1	1.28560726668294	7.79836089349365	14.7014754206893	2.25318192730813e-29	1.54874347501973e-28	56.0006993789839
CXCL1	3.33376718847656	9.42760346875	14.6992101148372	2.28157804142717e-29	1.56732718018659e-28	55.9881834441013
HIST1H2BF	1.78234896785482	7.41977641156006	14.6969344530303	2.31046546900373e-29	1.58622605486635e-28	55.9756097949789
PES1	1.09182659883626	7.59264079354858	14.6924616016483	2.36831796131754e-29	1.62400958596712e-28	55.9508946259627
THSD1	1.13022669905599	8.25743289001465	14.6910300398622	2.38713925908167e-29	1.63594258260609e-28	55.9429839879328
ERI3	1.30653518229166	6.38084224633789	14.6735593626828	2.62929168026455e-29	1.8008226499352e-28	55.8464272815947
LOC100130009	1.68404280232747	7.13082303668213	14.6720682380755	2.65106724441798e-29	1.81465867734003e-28	55.838184798578
PIGS	-1.0092923018392	9.95809146734619	-14.6614017989715	2.81220116595145e-29	1.9238126314494e-28	55.7792177635437
DEF8	1.23478759464518	8.59403608355713	14.6497379259542	2.99967230546403e-29	2.04612661312889e-28	55.7147241892289
SGK2	-1.64046828971355	9.68608456005859	-14.649725816102	2.99987332019417e-29	2.04612661312889e-28	55.7146572229329
RHOU	-1.78926862475586	9.51637825152588	-14.6485780426934	3.01898698916903e-29	2.05794577316093e-28	55.7083100849625
OIP5	1.72387106811523	8.27538198675537	14.6385534193396	3.19120531613129e-29	2.17148900112428e-28	55.6528690069789
WDR46	1.47929391251627	6.33857371795654	14.6316041051747	3.3163429553939e-29	2.2553088641195e-28	55.6144302785189
DPM1	1.08772658536783	10.6519491183472	14.6312891321925	3.32212992392277e-29	2.2579122425152e-28	55.6126879602075
SRGAP1	-1.00814675826009	8.34523363705444	-14.6248957102769	3.44181031515644e-29	2.33787551578128e-28	55.5773197894966
SDSL	-1.12708685139975	11.8929568328857	-14.6176857245125	3.5819737339001e-29	2.43164966022771e-28	55.5374297598147
LOC100128498	-1.11028847314454	8.74146794274902	-14.6127277628745	3.68166636967365e-29	2.49785569412762e-28	55.5099964360979
DCN	-2.60895624853516	10.870961319458	-14.6070240556491	3.79980207651165e-29	2.57346172361632e-28	55.4784338812228
XLOC_l2_013480	1.33559125854492	7.01218132269287	14.6067524853428	3.80552075469079e-29	2.57582135873874e-28	55.47693101813
JPH1	1.51073064855957	8.10402201211548	14.6037585463482	3.86914174546602e-29	2.61734723591472e-28	55.4603621738784
DUSP26	-1.60129495060222	6.82682131671143	-14.6021675103469	3.90338419646351e-29	2.63896244179677e-28	55.451556830353
TFCP2L1	-1.52905429305014	10.4123086589966	-14.5928667140993	4.10972823493094e-29	2.77196239696015e-28	55.4000782165648
CDC7	1.68892494311523	6.52608338153076	14.5821294624934	4.3615876075462e-29	2.94011814925059e-28	55.340638860672
FKBP1B	-2.36627826920573	8.86222339501953	-14.5609153519255	4.90563539100882e-29	3.30299410935506e-28	55.2231696973123
MT1A	-2.87296837679037	14.4955023282471	-14.5392447794809	5.53176458538151e-29	3.7158887165322e-28	55.1031293157752
WBSCR22	1.00349035847982	10.8223226959839	14.5378487336487	5.57474636563822e-29	3.74258016055397e-28	55.0953946533947
CLCN2	-1.48583053710938	11.0798775488281	-14.528883734383	5.85885993484862e-29	3.9310290144936e-28	55.0457205644221
OSTBETA	-2.39098608911132	10.3185469113159	-14.5249017569309	5.98967018655292e-29	4.0164588854215e-28	55.0236544509686
MAN1C1	-1.43955727864584	8.38264011157227	-14.5244151537683	6.00585496374186e-29	4.02497035854956e-28	55.0209578398423
DSC2	-1.57705691560873	10.3444375006714	-14.5124624944853	6.41748100779311e-29	4.29583644464757e-28	54.9547127970852
SMPDL3B	-1.35462643603516	8.99994279333496	-14.5014343941792	6.82232852599866e-29	4.5562561366852e-28	54.8935801240405
ASAH1	-1.09228346598308	12.4251665113525	-14.4846655500376	7.48756145000012e-29	4.98896652220528e-28	54.8006028218296
A1CF	-1.20584682918294	9.57753182965088	-14.4822803493013	7.58732940505066e-29	5.04960427552072e-28	54.7873756104921
INCENP	1.85992484301758	6.3818370269165	14.4798437172556	7.69062568300574e-29	5.11539770617468e-28	54.7738626411481
NDE1	1.00572560400391	10.5716057681885	14.4727637427325	7.99884173587675e-29	5.30822373892183e-28	54.7345957054879
GAL3ST1	-1.62678355948893	8.98451942962646	-14.4727614025033	7.99894563590459e-29	5.30822373892183e-28	54.7345827253489
ECI2	-1.49249967407227	10.8724079308472	-14.4659953441202	8.30507264797493e-29	5.50503579144376e-28	54.6970524994702
LOC389023	-3.87765293847656	8.23161988964844	-14.4649894403426	8.35157703155443e-29	5.53267979555907e-28	54.6914725537774
EARS2	1.58691292016601	6.30129914019775	14.4568376658637	8.73821040045938e-29	5.7821671231972e-28	54.6462496173153
SPC24	1.83408174226888	6.88229451971436	14.4387670780026	9.66052040532403e-29	6.37417393887637e-28	54.5459790665961
AP3S2	-1.12496948649089	10.3868329144287	-14.4373228064907	9.73831954300828e-29	6.42183119978584e-28	54.5379637594764
ACACB	-1.3767430193685	9.18748022009277	-14.4328577502678	9.98283775670057e-29	6.57931222535663e-28	54.5131827223421
NUP160	1.01771863346354	8.17846094677734	14.4321903908884	1.00199094002317e-28	6.59997118036978e-28	54.5094787243697
TPD52L2	1.52036806486002	6.67352959515381	14.4215815513561	1.0628121440635e-28	6.98200980598362e-28	54.4505917434163
XLOC_l2_008124	-1.68577534716797	7.45455014074707	-14.4215464135333	1.06301962431693e-28	6.98200980598362e-28	54.4503966851339
PRKCH	-1.15698261645508	8.12916296014404	-14.4183678008941	1.0819576093035e-28	7.09830697919261e-28	54.4327509946051
ASPM	1.83003211954752	8.51387386322022	14.4175771749685	1.08672043489702e-28	7.1254985512275e-28	54.4283617851254
FAM83E	-1.23235829333497	11.2928820766907	-14.4171062815039	1.0895671404118e-28	7.14010257392088e-28	54.4257475633156
PPP1R16B	-1.01383268713379	8.95313729122925	-14.4166812568794	1.09214297546076e-28	7.1488541045634e-28	54.4233879704863
SLC41A2	-1.14725832226563	7.42303693017578	-14.4150795258008	1.10190516854031e-28	7.20457225057522e-28	54.4144955533565
PROSER1	1.18961648388672	9.33652003894043	14.4139343626259	1.10893829492334e-28	7.24234092100928e-28	54.4081377451791
GRAMD1C	-1.31609865201823	8.57636682104492	-14.4089061267112	1.14035645765505e-28	7.44331194076433e-28	54.3802201660769
ZWINT	1.54250479142252	8.5498119508667	14.4043769478286	1.16941998483534e-28	7.62438018393493e-28	54.3550714559751
SSTR1	-1.61502793155925	7.63018177874756	-14.4020744629682	1.18447860874041e-28	7.71819385130058e-28	54.3422859652682
PSD3	-1.44764376969401	7.66831904821777	-14.4012357099337	1.19001238949798e-28	7.74987164618261e-28	54.3376283251956
FBXO32	-1.82997346582032	9.58702550024414	-14.400673070622	1.19373899891452e-28	7.76975123686483e-28	54.3345039233206
DHODH	1.20595334269205	8.01240006964111	14.4003039687479	1.19619008010799e-28	7.78131097821939e-28	54.3324542417861
ITGB3BP	1.16114902636718	7.81008204541016	14.3858848078445	1.29599889686284e-28	8.40685384588516e-28	54.2523726329896
NTN4	-1.36869682218425	7.71048093817139	-14.3792524623736	1.34467198164216e-28	8.71767937704676e-28	54.2155313460471
GNG7	-1.36421904866536	6.74955248864746	-14.3736759843195	1.38701254215275e-28	8.98712398729326e-28	54.1845520904008
LOC388796	2.11155230786132	8.03489180987549	14.3699807811981	1.41580322527243e-28	9.16851897624453e-28	54.1640224111222
NIPAL1	-1.26481022086589	9.28973257116699	-14.3629219183318	1.47247825255471e-28	9.52483547541986e-28	54.1248015908992
CDKN3	1.84479731648763	7.54876498065186	14.3547880493176	1.54061216726621e-28	9.95997557603901e-28	54.0796021749274
GALK1	1.27643173819986	7.0065306026001	14.3415132458243	1.65866823298975e-28	1.07051896537922e-27	54.005822065122
MBOAT1	-1.20697391088868	9.99770989508057	-14.3407386794347	1.66583032307658e-28	1.07453979485751e-27	54.0015166072758
BTG1	-1.11874765079752	10.4511393552856	-14.3364644857616	1.70591349608838e-28	1.09977991439658e-27	53.9777573612477
MYOM1	-3.24956586482748	7.13740484637451	-14.3289570255291	1.77867428179768e-28	1.14604686675695e-27	53.9360211603765
HCST	-1.81206884228516	10.0464588355713	-14.3281677429719	1.78650242339799e-28	1.15044767790551e-27	53.9316330098458
AKR1CL1	-1.55248952734375	6.8721935847168	-14.3179681790852	1.8908260383157e-28	1.2169487294062e-27	53.8749217681195
TMIGD2	-1.65998874267578	8.03027597009277	-14.3057111132852	2.02431043133623e-28	1.30068151293271e-27	53.8067581396573
CDC25A	1.97791225394694	6.71845386862183	14.3016602402734	2.07047244371371e-28	1.32886057119643e-27	53.7842275893039
NOS3	1.90552457405598	8.08840727600098	14.293680974567	2.16451183629852e-28	1.38612932983405e-27	53.739843423326
FTSJ2	1.13526744246419	6.76624605169678	14.283447187595	2.29141974356002e-28	1.46414608558849e-27	53.6829103095563
PITX1	1.99108127929687	8.02660986401367	14.2708738076591	2.45760453531704e-28	1.5685939910631e-27	53.6129486908774
TRAF3IP2	-1.02042733805339	9.26908122692871	-14.2568251253979	2.6576303850051e-28	1.69344972072713e-27	53.5347614934784
TRMT6	1.25175941837565	7.19976835736084	14.2525687107108	2.72139775776214e-28	1.73216741875893e-27	53.5110691909996
KIF15	1.61788485709635	7.21649452001953	14.2495443376715	2.76763776858217e-28	1.76062696238668e-27	53.4942337761547
SAMD13	-1.40908822713216	8.51831436712646	-14.233608359314	3.02462116735587e-28	1.92092607141108e-27	53.4055115313161
AMN	-1.75571011869304	10.8498932917786	-14.2260336740512	3.15503100098103e-28	2.00154333232297e-27	53.3633322456516
C17orf109	-1.98948409940593	9.5146947515564	-14.2228353212849	3.21177507025656e-28	2.03642086000261e-27	53.3455208497309
TIMM50	1.12596095629882	9.65299124249267	14.2189658472061	3.28179593363725e-28	2.07967354189316e-27	53.3239708255808
SIRT6	-1.25093689860027	9.91163465881348	-14.2159593618789	3.33725563509607e-28	2.11365635745892e-27	53.3072260836993
KNTC1	1.55822201546224	7.03002566174316	14.2141434213134	3.37120805312536e-28	2.13398765669281e-27	53.2971117447391
TRIM36	-1.62094695402018	7.77417091619873	-14.195179830318	3.74714786953508e-28	2.36546404666653e-27	53.1914719754488
XLOC_011284	-2.35359463085938	6.48575479516602	-14.194012764024	3.77161216668966e-28	2.37960445787804e-27	53.1849696149431
LSM14B	1.12112968261719	7.09298073876953	14.1777224370508	4.13030005059334e-28	2.60163763296117e-27	53.0941949426804
TCEA3	-1.7412158819987	11.11736909729	-14.1762183344747	4.1650958725334e-28	2.62212234422132e-27	53.0858124580097
XLOC_006513	1.26345829671224	11.3749976324463	14.1638201532746	4.46334594787044e-28	2.8022325022387e-27	53.0167089030381
MCOLN2	-2.48313116373698	8.96355524584961	-14.158282600006	4.60338836876234e-28	2.88858234767139e-27	52.9858400143258
MIS18A	1.13079300760905	9.04408597036743	14.1525813019708	4.75217755362542e-28	2.97870313543449e-27	52.9540555594766
COMT	1.44211716276041	9.64710002246094	14.1398746780904	5.10137309382433e-28	3.19237392250342e-27	52.8832066404071
CDC20	1.96626111401367	7.45597351678467	14.134777841587	5.24856988491691e-28	3.28161332957894e-27	52.854784051293
PTTG1IP	-1.18479661222332	12.2613449596558	-14.1347402801719	5.24967032163058e-28	3.28161332957894e-27	52.8545745811518
UBL3	-1.04608382084147	9.53867290640259	-14.1338454006819	5.27595613562362e-28	3.29625725611563e-27	52.8495840374441
ZNF703	1.6865096879069	7.05165174530029	14.1321479434948	5.32617971706884e-28	3.32583280599418e-27	52.840117506928
ZNF696	1.47487602006022	7.31095587997437	14.1291761106718	5.41526622503234e-28	3.37780161125258e-27	52.8235433269902
C12orf73	1.39537608235677	7.08291601391602	14.1278775506324	5.45466077951317e-28	3.39869593542964e-27	52.8163009016309
MT1F	-3.47487142757162	11.3703544202881	-14.1188452839459	5.73674198419445e-28	3.56866836760979e-27	52.7659214599178
UGGT2	1.16553993440755	8.60922040148926	14.111355868101	5.98170250643383e-28	3.7090416778732e-27	52.7241422902025
ADCY3	1.62010741520182	9.90650511218262	14.1098885816236	6.03090895372221e-28	3.73754233922343e-27	52.7159565738962
DIRC2	-1.24139234863282	9.35639748730469	-14.0921474229216	6.65900080580041e-28	4.12457293328648e-27	52.6169673837084
TNFSF12	-1.36502559578451	8.85100049395752	-14.0905044216885	6.72038758286145e-28	4.15851832629735e-27	52.6077986751274
SMC4	1.0546484921875	8.5888979543457	14.0904875762348	6.7210199027431e-28	4.15851832629735e-27	52.6077046684929
LILRB5	-1.99331420284017	7.232604056427	-14.090250306753	6.72993251674194e-28	4.16179893350238e-27	52.6063805754025
PDLIM1	-1.02918294034832	10.3795205739136	-14.0861352281791	6.88640733060106e-28	4.25627974798061e-27	52.5834154289545
TASP1	1.09148959171549	6.4656396885376	14.0826914085911	7.02015851633053e-28	4.33429926179657e-27	52.5641952884417
TRIM29	3.28348890625	6.08997263671875	14.0776736028707	7.2197174137204e-28	4.45273850336838e-27	52.5361888389961
MUC12	-2.09257285172527	10.5310924163818	-14.0723273070483	7.43860422369174e-28	4.58283222268812e-27	52.5063465927889
PVRIG	-1.83052775199382	8.19765168093872	-14.0689269238883	7.58127184793877e-28	4.66574055478859e-27	52.4873648840909
INSR	-1.03084663069662	10.0311193961182	-14.0642313936217	7.78280095698131e-28	4.78721166654875e-27	52.4611517569459
SAP30	1.17306159480794	8.24894135174561	14.0547892321281	8.20446281866705e-28	5.03851054399441e-27	52.4084345678774
SPINK5	-3.03515512353516	10.7044310203857	-14.0510562382903	8.37742029661319e-28	5.13651722122661e-27	52.3875905476806
CENPO	1.34608298787435	6.35213783978272	14.0465128914616	8.59286387183614e-28	5.26581296388385e-27	52.3622201473269
AGMAT	1.61774613313802	8.82878428637695	14.0419253157506	8.81604300286564e-28	5.39970922922594e-27	52.3366010001158
ANK3	-1.72860518815104	10.0256317705078	-14.0349567550587	9.16622527278714e-28	5.60525616548633e-27	52.2976819329835
EXPH5	-1.22774005151368	10.1139294546509	-14.0322787715832	9.30447909733169e-28	5.68376950476642e-27	52.2827244390377
RELL2	1.67430916642253	7.97701762420654	14.0232075001897	9.78852059117932e-28	5.9731221204089e-27	52.2320536648028
NSDHL	1.18648947216796	10.7600722884521	14.0182487047557	1.00637140565703e-27	6.12939680655004e-27	52.2043516469093
MICALCL	-1.33683498323568	7.42723221179199	-14.018210090064	1.00658871820935e-27	6.12939680655004e-27	52.2041359201146
GIMAP5	-1.47687038785807	7.32347878088379	-14.0174400807493	1.01093195068724e-27	6.15259376746139e-27	52.1998341209138
MON1A	1.01383825089518	8.92604326080322	14.0130535820959	1.03603485944587e-27	6.30204423474012e-27	52.1753271877996
GSPT2	1.52262309000651	6.84735238122559	14.0103867397885	1.05160113284904e-27	6.38998748463411e-27	52.1604270159084
TMEM120A	-1.0159896455892	10.6920638335571	-14.0029390894667	1.09632614077665e-27	6.65474008674691e-27	52.1188123771882
FOXA1	-1.78416214550782	8.36181421655273	-14.0020719212183	1.10165616020325e-27	6.68357397824361e-27	52.1139666691242
FAM156B	1.35919905013021	6.60812805908203	13.996046418623	1.13941625813108e-27	6.90538969898895e-27	52.0802946209966
GLDN	-3.23593418294271	7.94320514990234	-13.9954027235478	1.14352606967226e-27	6.92346496251488e-27	52.0766973092189
MPPE1	-1.18083454614259	8.47144709637451	-13.9861803092225	1.20406730173243e-27	7.28189075921813e-27	52.0251537400018
USP35	1.08557551407877	7.87451696160889	13.9857471311075	1.206988666044e-27	7.29573065206564e-27	52.0227325569686
ERVMER34-1	2.01861042923991	7.27847104452515	13.9853257322205	1.20983741088265e-27	7.30911731406932e-27	52.0203771971441
SPDEF	-1.74081622916667	8.85274602416992	-13.9783623866943	1.25789935395725e-27	7.58358046708431e-27	51.9814542521505
ACPL2	1.07017182503254	7.4201258614502	13.97241667082	1.30045000397334e-27	7.83601003439661e-27	51.9482163524486
POLR1A	1.59453735514323	7.31588491210938	13.9706793462128	1.31315354927934e-27	7.90842265545611e-27	51.938503760049
FAM55B	-1.48411493798828	6.97730113244629	-13.962326714608	1.37598816927005e-27	8.27819187222124e-27	51.8918044992598
EFCAB11	1.31602512947591	7.15632288970947	13.9607534216119	1.3881567921057e-27	8.34704399718436e-27	51.883007628462
DLGAP5	1.8655261110026	7.46531563110352	13.9591834750886	1.40040709555612e-27	8.41631521922598e-27	51.8742292649077
SRRD	1.01106133976237	6.56692567242432	13.9558941846408	1.42642608020097e-27	8.5682196073354e-27	51.8558365206574
FAM111B	1.9322685699056	6.52537051593018	13.9509967099258	1.46606707380742e-27	8.79258853266292e-27	51.8284496268188
TUSC3	-1.62365863647461	7.61008325128174	-13.9497593565506	1.47625603137088e-27	8.84909166594495e-27	51.8215299790107
SEPP1	-2.54032120296224	13.6942602877197	-13.9481854112889	1.4893193165656e-27	8.91812143483201e-27	51.8127278268013
PMAIP1	1.44647598160807	7.50502963635254	13.9395756434056	1.56285650854914e-27	9.34875297044416e-27	51.764574833877
MSRA	-1.30936598714193	10.1485796817627	-13.9280459773767	1.66706773058246e-27	9.96695525436932e-27	51.7000817860739
SNORD36A	1.80540336173502	7.33444599676514	13.9267363489938	1.67933711742333e-27	1.00351057296728e-26	51.6927554778511
NAP1L1	1.30165410437011	10.0109160801697	13.9239426840945	1.70581328329918e-27	1.01827600810925e-26	51.6771267192943
SESN2	-1.17132314306641	7.69746568908691	-13.9182176839225	1.76138534973663e-27	1.05090522393448e-26	51.6450970265868
FCGBP	-2.65621526407877	15.5306747944946	-13.9179704886504	1.76382531804425e-27	1.05181657739763e-26	51.6437139812714
CCNB2	1.39552733512369	10.1837144678955	13.9158280994421	1.78511448234807e-27	1.06396146008409e-26	51.6317272101869
CRYAB	-2.00618613907878	8.0300350335083	-13.9038900355881	1.90855063821449e-27	1.13635657059393e-26	51.5649262968306
XLOC_l2_007062	-4.46198073600261	9.46546205493164	-13.9020259131411	1.92858313525011e-27	1.14769116159154e-26	51.5544943189899
PAFAH2	-1.03470315714519	7.66770580560303	-13.8969070984512	1.98468268268702e-27	1.17985751848031e-26	51.5258470182407
GLO1	1.29395320694986	7.25785252496338	13.8942562383771	2.01437486139201e-27	1.19689170243637e-26	51.5110107167559
COL1A1	2.52628976424153	9.18829049078369	13.891330743238	2.04766051157617e-27	1.21541620581558e-26	51.4946366775283
ACOT1	-1.09806618229167	10.6481789389648	-13.8911824698448	2.04936214191304e-27	1.21580017549314e-26	51.4938067706417
GABPB1	1.23449667683919	6.41207913446045	13.8878202646537	2.08833072874815e-27	1.23828129168107e-26	51.4749875591257
GOLT1A	2.54784556713867	5.89968834173584	13.8807435818083	2.17279559346197e-27	1.28637980512769e-26	51.4353743688664
MT2A	-2.78316130802409	14.8434508980103	-13.8713607814339	2.29009081988236e-27	1.35443185637681e-26	51.3828459521655
AKR1C1	-1.69604549894206	7.54640409051514	-13.8591894549542	2.45175683276471e-27	1.44707634466353e-26	51.3146957213478
TNFRSF6B	3.37644183658854	6.581771921875	13.8493918920872	2.59017009575445e-27	1.52720668510289e-26	51.2598280961424
FAM3D	-1.83355325667319	14.9846740970459	-13.8483024535035	2.60603710400612e-27	1.53577656942119e-26	51.2537266213477
LINC00483	-1.34173156225586	8.95433471002197	-13.8464514383011	2.63321979174216e-27	1.5510027868887e-26	51.243359666246
LOC100507594	-2.31536725146485	6.62366883850098	-13.8441668272604	2.66716225666719e-27	1.5696171928099e-26	51.2305638974611
NRM	1.18952584749349	6.58669166003418	13.8336911919698	2.82850395133506e-27	1.66093556021595e-26	51.1718860503426
DOCK8	-1.50773890413412	8.13624575744629	-13.833065800427	2.83843983899015e-27	1.66592138615272e-26	51.1683827264672
SH2B3	-1.0392281266276	7.16258579150391	-13.8292699217717	2.89950203175859e-27	1.7000284801669e-26	51.1471182683257
B2M	-1.27553842122396	16.2126521889648	-13.8247062774246	2.97466104828079e-27	1.74232306420389e-26	51.1215512724652
C1orf81	-2.03850546175131	8.1468236854248	-13.8021454198972	3.375918716205e-27	1.97333747675938e-26	50.9951337316553
LONP1	1.13821217277017	8.69190229693604	13.8004233349919	3.40868946248598e-27	1.99148319483406e-26	50.9854825357929
ACAA2	-1.39476974609375	11.7492512773438	-13.7945489758407	3.5228952600454e-27	2.05300372409218e-26	50.9525587014227
O3FAR1	-1.68452533601888	8.9032853850708	-13.7907027044672	3.59974264570623e-27	2.09672731061424e-26	50.9310001451508
TIGD2	1.01501268041992	7.09166373577881	13.7876047531686	3.66285915603721e-27	2.13241300462833e-26	50.9136351115975
RHBDF2	1.65467428491211	8.88061290472412	13.786205204875	3.69173573238833e-27	2.14813921187482e-26	50.9057899353102
PRPS1	1.43988345800782	8.23361550390625	13.7753016015722	3.92466521026311e-27	2.28022257453139e-26	50.8446644256603
C4orf33	-1.01244178068034	9.46485888433838	-13.7732282299525	3.97059767575857e-27	2.30574707347451e-26	50.8330400606667
HMGB3P1	1.70197761071777	8.37210058444214	13.7689296204545	4.06755127122455e-27	2.35958112808113e-26	50.8089388137125
IGF1	-1.73871816796875	6.7927896340332	-13.7688467600269	4.06944329194525e-27	2.35958112808113e-26	50.8084742213766
AKIP1	1.06460909960937	7.42130814916992	13.7681036605329	4.08645058500979e-27	2.36825117613916e-26	50.8043076929197
XLOC_l2_012150	1.03018829577636	7.78133622616577	13.7567032142652	4.3564872047506e-27	2.52094518118274e-26	50.7403804192587
PPIC	-1.22127876147461	10.6589873010864	-13.7529355309793	4.4496075176213e-27	2.57353867815458e-26	50.7192511346527
BDKRB1	-1.98721010375977	8.56039387738037	-13.7510732691973	4.49636864662876e-27	2.59886888335601e-26	50.7088071023243
TMBIM1	-1.06061227897136	11.5381475803223	-13.7510121277257	4.4979122254665e-27	2.59886888335601e-26	50.7084642009751
FRMD4B	-1.35776815148926	7.78242583944702	-13.7498589561518	4.52712492490593e-27	2.61443732511977e-26	50.7019967832336
HS6ST2	3.71036003792318	4.40260945593262	13.7486893394042	4.5569485334942e-27	2.6303428014816e-26	50.6954370285302
PLAU	1.82888145011393	8.96118348687744	13.7355227301221	4.90658089352217e-27	2.8279078979815e-26	50.6215851869312
ANKRD12	-1.25473439054362	8.43414176165772	-13.7330139104404	4.97619096846738e-27	2.865162502174e-26	50.6075116207547
WDR18	1.05920819205729	10.912065987793	13.7279423147837	5.11994669690797e-27	2.94499129617057e-26	50.5790603168852
CENPE	1.79856314135742	7.15161192987061	13.7221042390886	5.29059127267002e-27	3.04011194417085e-26	50.5463066367564
RGS16	2.52321853800455	7.80765077618408	13.721466128962	5.30958529078635e-27	3.04950621060759e-26	50.542726451632
RNASEH1	1.18637199210612	6.60576793365478	13.7181773030554	5.40857027925961e-27	3.1048102394933e-26	50.5242736410663
PDZD3	-1.92800027677409	9.6932221338501	-13.7155029272163	5.49042428118578e-27	3.15022999946384e-26	50.5092677436673
STBD1	-1.81502428971355	8.03548262353516	-13.7080009973875	5.72672326363191e-27	3.28254296667753e-26	50.4671715309348
PPAP2B	-1.39835795056152	9.13152949929809	-13.6886735569042	6.38355716045253e-27	3.65358805305543e-26	50.3586978111908
CD81	1.1660176751302	11.9179554604492	13.6861038328564	6.47639802026682e-27	3.70488535878986e-26	50.3442732734575
FASN	1.5387393786621	9.87763704852295	13.6837569106486	6.56237156879376e-27	3.74848647539572e-26	50.3310989379427
MARVELD3	-1.39142761450195	8.40363468011475	-13.6817115883055	6.63822932484776e-27	3.78993905039723e-26	50.3196172740409
C7orf36	1.22478752937825	8.77073546893311	13.6775645281939	6.79474620423365e-27	3.87397896265659e-26	50.296336266635
TCEAL5	-1.27029820556641	8.14197273156738	-13.6707791129905	7.0588583197436e-27	4.0221186283581e-26	50.2582410667373
MYZAP	-1.32862624780274	8.01698324176025	-13.6698858026407	7.09438729664257e-27	4.04036572966398e-26	50.2532255126561
C9orf125	-1.26755308548992	11.3019013248596	-13.6688265133411	7.13675004033478e-27	4.06248482542909e-26	50.2472779789763
CKMT2	4.48513595841471	4.40576913421631	13.6614934671625	7.43704806010668e-27	4.22716237617602e-26	50.2061031756803
PCNA	1.28025124471028	10.3309032244263	13.6511873626898	7.88063281438354e-27	4.47487952962557e-26	50.1482278226313
FARSA	1.15442006852213	9.20034910461426	13.6503106854559	7.91956833316669e-27	4.49477420858751e-26	50.1433043475541
RORC	-1.5763487747396	9.77281023120117	-13.6472896826515	8.05522220564011e-27	4.56951507698885e-26	50.1263377564014
MEIS1	-1.98822327091472	6.79769184210205	-13.645913248817	8.11779910063246e-27	4.60274816689574e-26	50.1186071828249
PAQR5	-1.56606488802084	9.6461221472168	-13.6420320471442	8.29688739115412e-27	4.69966687753482e-26	50.0968081104704
CPT1A	-1.02554720922852	10.2128014559937	-13.6355110561737	8.60674496316975e-27	4.87278728833289e-26	50.0601798847714
CD177	-4.4172698055013	9.40492886511231	-13.6329853243096	8.72985354475682e-27	4.93763600639901e-26	50.0459920540621
ODC1	1.52779114998372	11.7235479038696	13.6252380711264	9.1185896897715e-27	5.15245016441157e-26	50.0024702879452
HECTD3	-1.19180510807292	9.30506919799805	-13.607980707602	1.00480491541384e-26	5.66930311305694e-26	49.9055072900823
FAM98A	1.01238031705729	6.81037711962891	13.6041530077409	1.02667486353491e-26	5.78703234815007e-26	49.8839977718701
FXYD5	1.79599695288086	7.65785911688232	13.6015664346148	1.04172306380435e-26	5.86611712578052e-26	49.8694620654086
MAPK6	-1.18514156567383	10.3137407069702	-13.5954739326274	1.07804771119991e-26	6.06474180917587e-26	49.8352221908572
PLEKHB1	1.89774238431803	9.04334644882202	13.5939114990965	1.08756606813997e-26	6.11530442314605e-26	49.8264408638231
KLHL21	1.07847022290039	9.11004127740479	13.5848385433292	1.14452749431621e-26	6.42932184550828e-26	49.7754446344865
HPSE	-1.43449484655762	7.7967946937561	-13.5832045239174	1.15509950111672e-26	6.48554892809178e-26	49.7662596734248
LIF	1.4046702167155	7.33671289117432	13.5788196925707	1.18395543136118e-26	6.64109696218991e-26	49.7416111840573
SPAG5	1.56461384871419	9.45704211834717	13.5761180295685	1.20209333104877e-26	6.73955730885173e-26	49.726423591214
FARSB	1.01716894311523	8.00626548968506	13.5690834815056	1.25063819390249e-26	7.00831621833447e-26	49.6868758305976
PRR5L	-1.1140201829834	8.55574510940552	-13.5588729048254	1.32461850856111e-26	7.41207647970092e-26	49.6294661249229
CIDEB	-1.27765486271159	6.88126695684814	-13.5566456423289	1.3413301524297e-26	7.5019469515076e-26	49.616942156247
SFRP2	-3.39569107307943	6.41630464196777	-13.5509510808937	1.385025036403e-26	7.742572063345e-26	49.5849197893757
PROCR	2.09128373152669	9.02725122259521	13.5491183937865	1.39938870915603e-26	7.81528762133795e-26	49.5746134865115
FGFR4	1.31087501578776	6.50654390222168	13.5464574387894	1.42051014501554e-26	7.92556652545701e-26	49.5596488943744
KITLG	-1.12640310001627	8.05687617584229	-13.5450510756436	1.43180198545322e-26	7.97698476864153e-26	49.5517396245667
FBXO25	-1.05985829728191	9.50542786651611	-13.5446717338183	1.43486314001646e-26	7.99017749515448e-26	49.5496062126544
LOC100652987	-1.14226122631836	9.07263057110596	-13.5346444661344	1.51820221043118e-26	8.45017715096099e-26	49.4932091978884
ST6GALNAC1	-2.21897197135417	12.9710343857422	-13.5112252369343	1.73224104707014e-26	9.62755185611258e-26	49.3614622305591
H2AFZ	1.14456530745443	11.9508922823486	13.506127480456	1.78270218647942e-26	9.90323282098714e-26	49.3327790468434
HENMT1	1.10393633789062	9.37626550927734	13.5032110912957	1.81223054267117e-26	1.00624188176159e-25	49.3163687584061
HOTAIRM1	-1.51091391015626	8.71757057519531	-13.5031154084134	1.81320759153329e-26	1.00629965852693e-25	49.3158303480243
SLC6A19	-4.25692913069662	8.2391274329834	-13.500060968083	1.8446764915364e-26	1.02277950543242e-25	49.2986425738097
CYBRD1	-2.18896661743164	8.05179971575928	-13.4977123129774	1.86924575230688e-26	1.03590364359815e-25	49.2854258943899
FGF13	-2.17766372469075	6.90665471148682	-13.4961927744024	1.88531612439855e-26	1.04430749475935e-25	49.2768747221967
YARS	1.40990238557942	7.35335461364746	13.4936855648294	1.91213526752966e-26	1.05865433375669e-25	49.2627650862838
RAD51	1.28043655041504	8.69507066384888	13.4912731556389	1.93830129335757e-26	1.07108336570147e-25	49.2491885221412
LRRC66	-1.5695688178711	9.52420104650879	-13.4872021711404	1.98327339270085e-26	1.09540931469395e-25	49.2262768689019
C1orf106	-1.17478963802084	10.3697614885254	-13.4853513994628	2.0040632347624e-26	1.10636192083842e-25	49.2158602609344
NRAP	-2.49986890332031	7.06610020385742	-13.4834729466767	2.02538740883437e-26	1.11706414648966e-25	49.2052876040696
Q6IHG2	2.830063556722	5.95455299627686	13.4803032001007	2.0618872977334e-26	1.13665111817183e-25	49.1874464709536
TNFRSF21	-1.06069428719077	12.0475245342407	-13.4775988359328	2.09354905834286e-26	1.15355353707066e-25	49.1722242021785
KHDRBS3	1.29682346809895	7.27833529711914	13.4769022143282	2.10178350142154e-26	1.1575374305249e-25	49.1683029877297
FLAD1	1.02009601700846	8.17433963006592	13.4689446051744	2.19818220409055e-26	1.20889533714465e-25	49.1235079141057
C22orf29	1.09564790942382	8.87675962457275	13.4633862962067	2.26813285057652e-26	1.24558205662676e-25	49.0922163157626
MAF	-1.40452517789714	8.18570494543457	-13.4557540890701	2.36783314722049e-26	1.29909627263259e-25	49.0492456944073
C1orf21	-1.12204984448243	8.30374964263916	-13.4482715236425	2.46984229977565e-26	1.3531308074864e-25	49.0071135423934
MT1X	-2.81651783512371	11.3901010162354	-13.4397132760668	2.59192808204983e-26	1.41934228036999e-25	48.9589196473626
HHAT	-1.11248828767904	7.51258917449951	-13.4388579310713	2.60445749427625e-26	1.42552618881873e-25	48.9541026733139
CCDC167	1.20278859830728	9.39482209204102	13.4379989325046	2.61710152408944e-26	1.43176693251917e-25	48.9492650714717
TESK2	-1.18133599747722	6.63719837432861	-13.4354989663075	2.65425096534588e-26	1.45140184428567e-25	48.9351857731639
DLEU1	1.14135901578776	7.78017612658691	13.4341814586948	2.67404130771745e-26	1.46153030602461e-25	48.9277656613632
SETD6	1.04396931913248	7.15552560073853	13.4274325788034	2.77775983324193e-26	1.51678055887161e-25	48.8897545077718
WLS	-1.15245426017253	8.57438717877197	-13.4263010469177	2.79554005272369e-26	1.52576658085918e-25	48.8833811595045
ERBB2IP	-1.17867590006511	10.2606880854492	-13.4247475408119	2.82013689141153e-26	1.53846275188361e-25	48.8746308958823
RRM1	1.00622297648111	10.4306207332153	13.4245012985712	2.82405554058378e-26	1.53987172262579e-25	48.8732438985333
GABRE	2.34846843383789	8.95568558868408	13.4239089735392	2.83350404958908e-26	1.54429319998172e-25	48.8699075190081
IL10RA	-1.6776476241862	8.77470015270996	-13.4165122586154	2.95419619564565e-26	1.60855075801641e-25	48.828242078109
WDR24	1.12388920857747	8.88013060308838	13.4161591731416	2.9600846405512e-26	1.61099601754645e-25	48.8262530632874
GRAMD4	-1.11650721655274	10.1340150515747	-13.4155539950084	2.9702046369078e-26	1.61574086123814e-25	48.822843929865
KBTBD11	-1.04020919563802	11.7159946025391	-13.4131844933407	3.01016307574793e-26	1.63670517802577e-25	48.8094956327449
C1orf96	1.29653332088216	7.17562356964111	13.4063618676692	3.12825228603054e-26	1.70011146162536e-25	48.771059001715
TBC1D4	1.22622243416341	6.97208870318604	13.3890975326878	3.4482334242945e-26	1.87224619320974e-25	48.6737823244598
ABTB2	-1.30924563346355	9.22131827978516	-13.3793657607681	3.64285687252978e-26	1.97327120158133e-25	48.618939039502
KIAA0101	1.6791709008382	9.48975245010376	13.3774710880725	3.6820095563538e-26	1.99354270343308e-25	48.6082608673516
ARMCX1	-1.51660908947754	7.29594072579956	-13.3773069494289	3.6854212056359e-26	1.99445306278709e-25	48.6073357878113
RARRES1	-1.76771729939779	9.70570502630615	-13.365830426634	3.93198869545293e-26	2.12489609435002e-25	48.5426498789685
MPI	-1.16680000830079	9.97924986975098	-13.3613408353275	4.03288534846542e-26	2.17840062847989e-25	48.5173424064651
GPR180	1.43456856982422	6.4822094173584	13.3496466560731	4.30804563336546e-26	2.32376424968665e-25	48.4514167065405
HSPA2	-1.63182511580404	8.25921857977295	-13.3235921023152	4.99068010647653e-26	2.68183774113138e-25	48.3045009090257
FARP1	1.41640389933268	7.52242982647705	13.3235161736245	4.99282015482601e-26	2.68183774113138e-25	48.3040726963116
PPM1N	1.37307811909993	6.71164998587036	13.3199981126318	5.09299175799801e-26	2.73309664778599e-25	48.2842315647378
F13A1	-2.38717502156576	7.61662773297119	-13.3029862163637	5.60654384603099e-26	3.00449237160387e-25	48.1882761470398
TRAF5	1.57124868302408	8.72529263421631	13.3025873181083	5.6191890174084e-26	3.00986950760532e-25	48.1860259304087
SLC46A3	-1.37194916927083	8.52785664648438	-13.2962773751563	5.82306082075878e-26	3.11617558407087e-25	48.1504296127268
ANKRD43	-1.48601257096355	10.4271518000488	-13.2891846319526	6.06108814773182e-26	3.23904325817824e-25	48.1104140736773
SCAMP2	-1.07485996622722	8.65036859136963	-13.2844239163939	6.22629963842538e-26	3.32579035830071e-25	48.0835533710404
AKAP5	-1.24601546899414	7.21195403045654	-13.2830185875807	6.27592621036618e-26	3.35074578169944e-25	48.075623994762
NTN1	-2.35250363606771	6.47639342163086	-13.2737828790447	6.61207949570151e-26	3.5269523529362e-25	48.0235094735928
LRP10	-1.24048793107097	9.62392374298096	-13.2670264751538	6.86936917080276e-26	3.66249853986325e-25	47.9853813612338
PNMA1	-1.0557093146159	8.68384044567871	-13.2662433956546	6.8998310729161e-26	3.67703896336125e-25	47.980962046606
LOC643650	-1.84141419986979	7.11168284643555	-13.2645441204958	6.96639954674072e-26	3.70908487645636e-25	47.9713720347445
PIF1	1.72520938053385	7.09470563867187	13.2561496039675	7.30481646724673e-26	3.88567694591385e-25	47.9239940065261
UTP18	1.05263481587728	8.40441607229614	13.2316378877701	8.39026164953597e-26	4.45483860129899e-25	47.7856249678747
TMEM37	-2.31321996940104	11.1666700444336	-13.2244779969973	8.73682214284688e-26	4.63244474887746e-25	47.7451997912727
LOC284889	1.42065631530761	8.80220120492554	13.2212528423685	8.89758111362812e-26	4.71334639231578e-25	47.7269892738973
HMMR	1.87089100138346	8.65776863226318	13.2165392169332	9.13788096570979e-26	4.83841772584918e-25	47.7003730274044
TRMT61A	1.31069166414388	7.74415575115967	13.2162459377221	9.15304542488757e-26	4.84422197487048e-25	47.6987169309821
KLRB1	-1.95510263321941	8.69901083453369	-13.2123793211941	9.35534899040662e-26	4.94674806478977e-25	47.6768822979634
TPSAB1	-2.44435004463705	8.00282922781372	-13.2073225832002	9.62669806064149e-26	5.08556134486776e-25	47.648325622677
PVRL3	-1.05867400317383	9.78352619744873	-13.1861619001297	1.08504528983413e-25	5.71893783992591e-25	47.5288078731948
EIF3E	1.01861191129557	13.11140440979	13.1857291241034	1.08770443492104e-25	5.73033319073806e-25	47.5263632062939
PABPC1L	2.61262483943685	6.26927144171143	13.1640649891123	1.2295092855165e-25	6.47148563203137e-25	47.4039713426986
ZNF707	1.15438823547363	7.52499049710083	13.1533705247781	1.306198813771e-25	6.8657335733417e-25	47.3435417097925
ATP1B3	-1.23968064672852	15.259538210144	-13.1504702670672	1.32781053449403e-25	6.97297131257982e-25	47.3271523934941
TMEM201	1.21333073160807	7.7326867779541	13.1414147234516	1.39762266543138e-25	7.32623759182699e-25	47.2759761990237
RIPK3	-1.17853594075521	8.6657862277832	-13.1396122213586	1.41195167458909e-25	7.39798497863111e-25	47.2657889782426
PLEKHG6	-1.11235397672527	7.8951239251709	-13.1353755106139	1.44621380966349e-25	7.57062061035014e-25	47.2418435035537
LMO2	-1.47628431201172	8.89877522131348	-13.1261954774573	1.52333801781294e-25	7.96349992350558e-25	47.1899549621387
TMEM133	-1.15048060546876	7.04990650512695	-13.075753569347	2.0268491038326e-25	1.0533584138809e-24	46.9047466743362
DDX39B	1.01488353865559	6.53657873077393	13.0747833169532	2.03801677449838e-25	1.05868496438228e-24	46.8992591316322
ANKRD9	-1.01162058870443	12.0702060828857	-13.0610169029534	2.20327710356244e-25	1.14298718149254e-24	46.8213929633843
ARFGAP1	1.06378565437825	10.4241372445679	13.0589613427761	2.22908000822415e-25	1.15585268802518e-24	46.8097652203153
TK1	1.37206490844726	13.0410529324341	13.0563859383631	2.26183614625944e-25	1.17231048821639e-24	46.7951964954928
FGFRL1	1.76135248730468	6.48120737573242	13.0549797482536	2.2799243657251e-25	1.18115452421183e-24	46.7872416914872
P2RY2	-1.22923597863771	9.79182549520874	-13.0486535025798	2.36311040186646e-25	1.22315103737381e-24	46.7514526878233
SNRPB	1.20585532430013	10.9636198964233	13.046341761362	2.39426127922272e-25	1.23816284278153e-24	46.7383740362242
ASB1	1.02019155566406	6.95789243920898	13.0419795260013	2.45416787523657e-25	1.26857368151802e-24	46.7136938504854
SLC11A2	1.13511483764648	7.59918333538818	13.0417859255492	2.45686112486528e-25	1.26939660180735e-24	46.7125984918967
DHCR7	1.70255983089192	10.862491819458	13.0402243138013	2.47869386892342e-25	1.2801032359803e-24	46.7037630737786
PMM1	-1.01052605216472	9.8455053604126	-13.0349847439178	2.55337817719478e-25	1.31749284908345e-24	46.6741171150644
C11orf73	1.05824859358723	10.0180220015869	13.0328959476501	2.58377655227873e-25	1.33258131177257e-24	46.6622980541407
HIST1H3J	1.37396470141601	6.71030346832275	13.0327064705316	2.58655189834229e-25	1.33341608820177e-24	46.6612259204412
LOC100129480	-1.46269211287435	7.89840408734131	-13.0321522497185	2.59468694759107e-25	1.3370119108128e-24	46.6580899155476
NDRG2	-1.14847135530599	12.5359872181396	-13.0300667471207	2.62552910217614e-25	1.35180402126252e-24	46.6462891344028
LDOC1	-1.30625388476563	7.12716776538086	-13.0300526466483	2.6257388770771e-25	1.35180402126252e-24	46.6462093462242
ACOX1	-1.37291090030925	12.1201195133667	-13.0240940929811	2.7159052936086e-25	1.3976000142601e-24	46.6124915200721
PITPNM3	-1.44006412605795	8.16083846612549	-13.0225597325669	2.73962175441006e-25	1.40917536649196e-24	46.6038086476402
UBA7	-1.01209434529623	9.02344864227295	-13.0157197199627	2.84789731442118e-25	1.46421553716917e-24	46.565099620651
CLCA4	-4.77073720019532	11.2633687233887	-13.0145882433218	2.86621713819653e-25	1.47297748337011e-24	46.5586960927535
NCAPD2	1.04641391894531	9.86549311572266	13.0112160066228	2.92152066857627e-25	1.49805910794834e-24	46.5396106553068
GSTM5	-2.11354670963542	7.33418157373047	-13.0084193277513	2.96819541747963e-25	1.51996395278932e-24	46.5237821160875
TIMP1	1.46557952848307	9.88000435314941	13.0055527048608	3.01681302713692e-25	1.54417423462732e-24	46.5075572251231
TCEAL6	-1.20691732661947	8.79054195614624	-13.0021097699958	3.07626065440768e-25	1.57390397529327e-24	46.488069799201
STMN1	1.1507100332845	11.3795226239624	12.994297828334	3.21553556886033e-25	1.64151809133096e-24	46.4438506505666
ERN2	-1.48624683984375	10.4551411467285	-12.9787250390535	3.51231028541924e-25	1.79222667817741e-24	46.355690770361
NHEJ1	-1.18614046809897	7.67527167749023	-12.9757159716141	3.57274345640058e-25	1.82225724875794e-24	46.3386543401806
CEACAM1	-1.88575027368165	12.494253553894	-12.9754319530966	3.57850112809531e-25	1.82438666534961e-24	46.3370462856588
ANKS6	1.02012881917318	9.48880338049316	12.9749641840158	3.58800409408791e-25	1.82842277597486e-24	46.3343978628352
REG1A	7.49570476367187	5.9742703371582	12.9725215265976	3.63804021977558e-25	1.85228311013044e-24	46.320567775045
POC1A	1.409584291097	8.16135612542725	12.9666177168297	3.76188173243709e-25	1.91195814505301e-24	46.2871395335291
LPCAT4	-1.15603641658529	8.16281295623779	-12.9646022789806	3.80511863425955e-25	1.93308076232304e-24	46.2757273592782
SNORD47	1.87283428271484	6.2765813548584	12.9634742409388	3.82953523532623e-25	1.9446278703791e-24	46.2693398758225
CERK	-1.34303500565593	8.54864944784546	-12.9476053194227	4.19013444923359e-25	2.12493091932757e-24	46.1794746851247
HIST1H2AL	1.65526251383463	6.55691825280762	12.9450171531526	4.25209264907473e-25	2.15445591058832e-24	46.1648165932178
GIMAP6	-1.25700223250326	7.13233261431885	-12.9446903040832	4.25998210042888e-25	2.15722523459174e-24	46.1629654543331
SGK223	-1.33088759179687	10.9831274260254	-12.9446357160177	4.26130117043931e-25	2.15722523459174e-24	46.1626562893466
LYRM4	1.08945178637695	8.11385243023682	12.941948837187	4.32673542403599e-25	2.18842822434677e-24	46.1474386680622
HIST1H2AI	1.26470661206054	7.41132116131592	12.9407833186384	4.35543175643798e-25	2.20197639721318e-24	46.1408374142128
NEURL1B	-1.5257647425944	11.0494358391724	-12.9330245974751	4.55138117170512e-25	2.30003379071657e-24	46.0968916353299
LRRC31	-1.0433457080892	8.25796801202392	-12.9256575237848	4.74560886721315e-25	2.39713555707125e-24	46.0551609549531
ZNF350	-1.16081409020996	8.49754591152954	-12.9094839946392	5.20164059958224e-25	2.62633864176016e-24	45.9635353193808
BCCIP	1.06202498795572	6.54192010522461	12.8966620834574	5.59417308183667e-25	2.82205834198386e-24	45.8908865403433
MRTO4	1.46859401786295	7.96627823928833	12.8965819455461	5.59671751680583e-25	2.82210685985218e-24	45.8904324506726
GNE	-1.56871690486654	12.6894252628784	-12.8879125232018	5.87893823472818e-25	2.96182347166572e-24	45.8413063023122
PRPS2	1.07765364477539	6.51451453936768	12.8877552861242	5.88418639010968e-25	2.96317241235449e-24	45.8404152635324
IL18	-1.16235899454753	9.25009432745361	-12.8857017598861	5.95316013692903e-25	2.99659724447078e-24	45.8287781125095
C2CD2L	-1.08833348950196	10.633270763855	-12.8851059073497	5.97332480255399e-25	3.00543496285639e-24	45.8254014246033
LOC283070	-1.47945451741537	10.2278412652588	-12.8724656431877	6.41759152857896e-25	3.22755573952573e-24	45.7537645286644
SAMD10	1.24013642057292	7.53027648339844	12.8709928347645	6.47146406250896e-25	3.25323010242219e-24	45.7454170146687
TRAK2	-1.0077273601888	8.1554809720459	-12.8680853479919	6.57914809387224e-25	3.30592153784068e-24	45.728937742882
PDK4	-2.40035965730795	8.7899868994751	-12.864634000598	6.70930771236471e-25	3.36985577343913e-24	45.7093753250461
SHD	-1.29666598649089	10.6093511072998	-12.8572309040181	6.99726625769945e-25	3.50837269040894e-24	45.6674119503697
AGTRAP	1.36505038264973	6.7576237322998	12.8514959816049	7.2288221937549e-25	3.62289710553968e-24	45.6349022880218
B3GNT8	-1.31359220784505	10.5203425611572	-12.8482161959608	7.36468296118016e-25	3.68617891852035e-24	45.6163092878097
ZYX	1.04569388301595	8.53326359384155	12.8440630838338	7.54039684824315e-25	3.7724893433029e-24	45.5927645757927
NEURL	-1.61388139249675	10.8281859586792	-12.8424132698113	7.61135888067782e-25	3.8046892375357e-24	45.5834112305745
C7orf50	1.1350247606608	9.44797690704346	12.8346551205665	7.95412903140751e-25	3.97258428704655e-24	45.5394256924041
STX19	-1.28199404630534	10.5650315056763	-12.8280552229556	8.25787284250821e-25	4.12249892834959e-24	45.5020043710383
TNS4	2.46101958707682	9.05085866760254	12.8249600172356	8.40429808100891e-25	4.18834171983527e-24	45.4844537807793
CITED4	1.79481947867838	9.25971688659668	12.8223987984717	8.5274266434315e-25	4.24786719614671e-24	45.4699306351401
HIST1H1C	-1.3738211443685	13.8199291959229	-12.8210343942803	8.59375541059334e-25	4.27905911956412e-24	45.4621937660583
PRSS3	-1.01123600626628	12.5146136931763	-12.8186014141352	8.71331681100268e-25	4.33671860450898e-24	45.4483972739481
ANO6	1.02282044710286	8.20906897595215	12.8096278569994	9.16888417222285e-25	4.55362894671318e-24	45.3975089150502
TARP	-1.29584529654948	7.85935036181641	-12.8084951410715	9.22806056907743e-25	4.5810445383185e-24	45.3910850594354
ARHGEF18	-1.00125745808919	11.851360864563	-12.806008114794	9.35933586272266e-25	4.64021782750985e-24	45.3769803993682
TNFRSF11A	-1.15475415462239	7.81633414477539	-12.7999323917001	9.68795913176076e-25	4.79901611137973e-24	45.3425217778803
TDGF1	2.48992625512695	6.78076461090088	12.7816113746157	1.07505617096518e-24	5.31396761694493e-24	45.2386016624099
NME4	1.37783527172851	7.86513490997314	12.7787583189905	1.09262349406017e-24	5.39848736220815e-24	45.2224170035336
MYO7B	-1.05267721744792	8.98255162988281	-12.7720968194268	1.13476860964143e-24	5.60191767166459e-24	45.1846263279223
ZNF48	1.1421897976888	7.03914805944824	12.7639689747543	1.18840281939129e-24	5.85665639124555e-24	45.1385138977662
C14orf159	-1.10851141048177	9.09297825195313	-12.7566880426108	1.2386013719085e-24	6.10143504871337e-24	45.0972033756546
C2orf72	-1.39484189908854	7.83345506884766	-12.7520402272135	1.27175106989604e-24	6.2620566350669e-24	45.0708311646192
LOC100130111	-2.30469146451823	8.56011785888672	-12.7491107131034	1.29310045058398e-24	6.36446152599551e-24	45.0542082011874
SGCA	-1.65051142838541	6.7118718112793	-12.7487991660982	1.29539192377884e-24	6.3730186536059e-24	45.0524403613326
TMEM41A	1.21645650292969	6.47423838842773	12.7242747267714	1.48914423578699e-24	7.31686513466184e-24	44.9132632405276
LOC389332	-2.06988429642741	10.7408768858948	-12.7214744375334	1.51303807825535e-24	7.43109924501468e-24	44.897369514333
PMS1	1.00717844604492	7.0799253258667	12.7172084731034	1.55017823360978e-24	7.60702618085142e-24	44.8731562154844
SPRY4	1.24799970548503	6.57664344158936	12.7129152939206	1.58847739169988e-24	7.79165059324449e-24	44.8487875053856
CHAC1	1.85321680379231	7.19947180072021	12.7025289891222	1.68509945485684e-24	8.25154690574972e-24	44.7898294319553
XLOC_l2_012374	1.05913036010742	6.72941576116943	12.7020963116804	1.68924990841296e-24	8.26835825659285e-24	44.7873732102974
CAPN9	-1.94131885970052	8.24468946704101	-12.6902864454205	1.80657711542655e-24	8.82764493833056e-24	44.7203273403056
TUBG2	1.18331439957682	6.5754420826416	12.6830670321879	1.88228476088365e-24	9.18201288138207e-24	44.6793384918215
CD3G	-1.49131005346679	8.37081252496338	-12.6818169732188	1.89571285213641e-24	9.24360492663975e-24	44.6722409066577
SNORD38B	1.48841763781738	6.42171946768188	12.6731326412731	1.99168643395966e-24	9.69108042391433e-24	44.6229308418409
IQCB1	1.0681348729248	7.59612934310913	12.6673157200336	2.05867827119241e-24	1.00085973985807e-23	44.5898999688338
FAM55A	-2.20340637760417	10.4442995458984	-12.6672106506809	2.05990885334821e-24	1.00103580744287e-23	44.5893033263042
CCNJ	1.02006382771809	6.51784084796143	12.6515339868344	2.25202165086639e-24	1.09301278187524e-23	44.5002763288322
CASC5	1.70842065804036	6.99032277966309	12.6504008587423	2.26658410760377e-24	1.09961763503151e-23	44.4938408798375
C9orf16	1.01046019531249	8.49821780737305	12.6351316980906	2.47226846635336e-24	1.1973881769603e-23	44.4071155828836
RNF125	-2.39507305680339	9.22343434167481	-12.6339414345408	2.48906652270264e-24	1.20501763154949e-23	44.4003546824437
XLOC_l2_004840	-2.26845661442058	8.63531235168457	-12.6294688369905	2.55321612162218e-24	1.23503660234741e-23	44.3749489471491
LINC00094	1.03273276000976	8.42899213555908	12.6293005406784	2.5556620277367e-24	1.23570118262252e-23	44.3739929531328
PLCB4	1.65466628662109	6.94747547888184	12.6225134784633	2.65628129108173e-24	1.2838136034507e-23	44.3354384329001
CD96	-1.58674418904622	6.76945596112061	-12.6131054361951	2.80235276554161e-24	1.35157825641833e-23	44.2819915159316
SLC27A5	2.26050698429362	8.11400315924072	12.6076333390468	2.89098694240178e-24	1.39374347490863e-23	44.2509026727081
EIF4EBP1	1.17277688427734	10.6661008338623	12.6069610697077	2.90206791765892e-24	1.39850070597217e-23	44.2470831831305
SLC12A2	1.04901432820638	9.97920296380615	12.6031969230012	2.96490270975252e-24	1.42758703155043e-23	44.2256968326603
SPP1	2.72909534798177	5.66121932568359	12.5967239254342	3.07615940304242e-24	1.47992026038689e-23	44.1889183119221
LOC100127888	2.38322968774414	7.20558843658447	12.5911255110042	3.17575067037024e-24	1.52719557686098e-23	44.1571074231801
GALNT6	1.24963760180663	8.88477395831299	12.5884905730778	3.22373547315027e-24	1.54897869107975e-23	44.142134863089
SLC7A11	2.08821892521158	6.48538525994873	12.5824921544528	3.33569838244662e-24	1.60144086857402e-23	44.1080487060506
HIST1H3F	1.23884183512369	10.501379789917	12.5567563821466	3.86199366898126e-24	1.85025773160212e-23	43.9617854136813
UCKL1	1.17904380086262	6.64932537762451	12.5561283128074	3.87582778632451e-24	1.85611412102046e-23	43.9582155418164
LOC100507507	1.30468636051433	6.75309260461426	12.5466537139844	4.09064372253664e-24	1.95736198379742e-23	43.9043608323035
TMEM54	-1.03400907267253	15.1293848203735	-12.5363310458642	4.33828440219405e-24	2.07499602921539e-23	43.8456809031775
LOC728392	-1.51295944824219	7.44559568066406	-12.5157976557749	4.87641589207287e-24	2.3256287127813e-23	43.7289429875876
C11orf86	-2.93023031355795	8.65729499078369	-12.5157211778215	4.87854031630766e-24	2.32567966195527e-23	43.7285081539714
ZNF655	-1.46489675646973	8.59995815963745	-12.5142417018925	4.91982047335482e-24	2.34358611430863e-23	43.7200961895083
TDP1	1.02253220792643	8.86234747686768	12.4967826014349	5.43420916824791e-24	2.58309810649046e-23	43.6208203063213
PCSK9	3.92464807283528	6.69278795440674	12.4910997687219	5.61299788583498e-24	2.66588490440955e-23	43.5885036750217
KLK1	-1.88693261991374	11.9759332710876	-12.4675947567919	6.41726730867505e-24	3.0428564486671e-23	43.4548223605954
C12orf57	-1.01499530989585	12.9654442832031	-12.4599886473676	6.70148950688247e-24	3.17370869128325e-23	43.4115585699248
TNK2	1.11952699666341	8.87689631939697	12.4583867011038	6.76293926631331e-24	3.20149490442684e-23	43.4024463301515
CD52	-2.18385888224284	11.2073622354126	-12.4343797499856	7.75441253838883e-24	3.6663295049224e-23	43.2658760796897
CREB3L1	-1.05397092195639	10.5663154155884	-12.4198633431267	8.4232632635761e-24	3.98093299053881e-23	43.1832835804798
LOC645261	-1.36565894620768	10.5167694572144	-12.418776177527	8.47562106090594e-24	4.00239590205091e-23	43.1770976906463
ACACA	1.1635354169108	10.0608653782349	12.4178494252345	8.52051061561438e-24	4.02194618616654e-23	43.1718245013565
WNT5A	1.43257891975911	6.84796995788574	12.4165375239604	8.58446318744932e-24	4.05047511918659e-23	43.1643597660172
FBLN2	-2.50360005403645	7.88169222753906	-12.4151810143911	8.65109585673794e-24	4.08024476025443e-23	43.1566411333758
SNORA70G	1.71764348095703	6.80945408776855	12.4051770154081	9.15876101294809e-24	4.31262410932405e-23	43.0997153286776
SLC9A9	-1.74826800016276	6.70094936242676	-12.3996643655834	9.45114717155771e-24	4.44848401170052e-23	43.0683448995836
GIMAP4	-1.25527096069336	7.59792715997314	-12.382665108017	1.04129493582493e-23	4.87927102652601e-23	42.9716006279912
IKZF2	-1.23663063281251	7.57167043701172	-12.3761515266629	1.08069345625914e-23	5.06182587171847e-23	42.9345281451895
LOC100131262	1.68925062597656	9.71107093432617	12.3673665983301	1.13620537914505e-23	5.31535690154422e-23	42.8845254278428
GEMIN4	1.10971917846679	8.1259974730835	12.3560019580704	1.21227615796487e-23	5.65974373141394e-23	42.8198347255725
COL9A3	2.19768613476562	8.48070953442383	12.3363362929592	1.35615625311584e-23	6.3186795188627e-23	42.7078801898968
THOC3	1.21619273689779	9.36210408795166	12.3224472348576	1.46796167600522e-23	6.8340849108692e-23	42.62880215139
ABCG2	-2.64004909944662	6.04320752087402	-12.314965287104	1.53196893260673e-23	7.12316915013347e-23	42.5862002235069
NOSTRIN	-1.14376694539388	11.0882891113892	-12.3139202845538	1.54112851155684e-23	7.15736839351961e-23	42.5802498474702
B3GNT6	-2.23807872762045	6.71436256695557	-12.3105695857742	1.57086924549189e-23	7.29255327941402e-23	42.5611702652907
NELF	1.41236144213867	6.50545440179443	12.2974614303493	1.69284344803429e-23	7.84616261579864e-23	42.4865255729881
SNORA10	1.41215362329101	8.78153030987549	12.2959254517954	1.70774311409242e-23	7.90886093858711e-23	42.4777784822709
PRMT5	1.070644203125	8.06648742285156	12.2904060565483	1.76237567421487e-23	8.15204831327241e-23	42.446345897814
C20orf3	1.25677786482747	7.20255508306885	12.2892198067818	1.77434411090463e-23	8.2041173551535e-23	42.4395901360357
ST3GAL2	1.38228993229167	6.32145497509766	12.281985809565	1.84911204261776e-23	8.54297174960118e-23	42.3983909613228
CFHR3	-2.13062267716471	7.54474465118408	-12.2768069304776	1.90456910554261e-23	8.79566028829712e-23	42.368894932133
TPRG1L	-1.03204975512696	9.22462160614014	-12.2674432283348	2.00910047530373e-23	9.26356047153044e-23	42.3155619513256
C7orf23	1.05040484798176	7.97467503393555	12.2672928499794	2.0108252661805e-23	9.26780601489907e-23	42.31470541273
CDCA2	1.59484536092122	7.78232971588135	12.2590249421621	2.10797280773199e-23	9.71167168454303e-23	42.2676110452482
SATB2	-1.02345285449219	9.61657761743164	-12.2585787625704	2.11334705358873e-23	9.7325415448331e-23	42.2650695157263
XLOC_l2_000917	1.25360579524739	6.85178439648438	12.2462936557671	2.26683444002848e-23	1.0422736573677e-22	42.1950882208425
BDKRB2	-1.61454172583009	10.037952522644	-12.2447692533301	2.28664244845727e-23	1.05012460172777e-22	42.1864041840723
KLHL7	1.18422860416666	7.03725752978516	12.2382242698506	2.37367601859207e-23	1.08922625263976e-22	42.1491185448938
MOGAT2	-1.55447035009766	6.58808596838379	-12.2375759470627	2.3824757747975e-23	1.09282921830843e-22	42.1454250787801
STK17B	-1.13432032893881	8.0731507442627	-12.233998908124	2.43161787336038e-23	1.11492677908612e-22	42.1250465778924
ITGA3	-1.08366341333008	9.04332578704834	-12.2330644981016	2.44462133283114e-23	1.12044334407732e-22	42.1197231403456
HK2	-1.14765868025717	12.1538422611694	-12.2306632811443	2.47835744885838e-23	1.13545414598531e-22	42.1060429989959
HIST1H2AB	1.37522575024414	7.66660590313721	12.2260172829793	2.54496101593832e-23	1.16457981860742e-22	42.0795733784714
PDZK1	-2.6580493507487	7.81730271374512	-12.2251503995777	2.55758534456287e-23	1.16989231217366e-22	42.0746344040229
WEE1	1.08208630061849	7.79228874914551	12.2178944631925	2.66574178376054e-23	1.2170598660934e-22	42.0332934560558
BTBD3	-1.1777189444987	8.64636084313965	-12.2178787515035	2.66598088130982e-23	1.2170598660934e-22	42.0332039361646
CAMK1D	-1.29885104451498	9.8594314598999	-12.2057818149689	2.85659149528931e-23	1.30252888315664e-22	41.9642771329338
C5orf41	-1.20688282356772	9.04959560083008	-12.2014102970463	2.92878003937032e-23	1.33438922979533e-22	41.9393675351283
SPATS2L	-1.05740700683594	11.4701206125488	-12.1980490226331	2.98552576617757e-23	1.35970586751201e-22	41.9202140173064
EDIL3	-2.47511894889323	6.77734013696289	-12.1968830982288	3.00546520252129e-23	1.36824634239585e-22	41.9135701509963
BDH1	-1.08995226554363	11.4199882506714	-12.1892589882752	3.13917882629731e-23	1.42799188361204e-22	41.8701240234521
VIM	-1.30876742879232	12.8874855339966	-12.1772400520655	3.36216919131134e-23	1.52701829268108e-22	41.8016299005223
ZNF613	-1.04479105594889	8.05357338961792	-12.1733328942359	3.43802245065778e-23	1.56085406808713e-22	41.779362546074
CHRFAM7A	-2.61229497013347	6.18748669024658	-12.1703345429561	3.49739209457738e-23	1.58718262496825e-22	41.762274242099
CFH	-2.11301400301107	8.30002768218994	-12.167359616684	3.55731229966277e-23	1.61374021559279e-22	41.7453191472222
DDX60	-1.90831798421224	9.29035241101074	-12.1647694312568	3.61031955535775e-23	1.63649836864368e-22	41.7305565795004
SCARA3	-1.29387178776042	8.00071463110352	-12.1611957149447	3.68475507961809e-23	1.66958222495117e-22	41.7101880872341
ECH1	-1.02632870442709	10.9759879499512	-12.1573830970263	3.7658613403593e-23	1.70499150315482e-22	41.6884575051892
LOC100505771	1.24384961092122	8.06856302349854	12.1502746725996	3.9218827457435e-23	1.77354030640194e-22	41.6479407130696
MC1R	1.49756299934896	6.30602438208008	12.1352580780243	4.27308334582975e-23	1.92933144251389e-22	41.5623433263914
PTGDS	-1.27364425219728	8.99983064447022	-12.1351180050451	4.27650332440549e-23	1.93011957010266e-22	41.5615448501554
SULT1A4	-1.0458309046224	11.3651445456543	-12.1290490842616	4.42734164353959e-23	1.99585323132893e-22	41.5269487895631
TGM2	1.92953492456055	6.05549726702881	12.1257358473225	4.51192540508324e-23	2.03239406582237e-22	41.50806109098
MAN1A1	-1.21806176570638	9.00611636016846	-12.1207225358833	4.64299642614064e-23	2.09061796109856e-22	41.4794811539188
FADS1	2.24833505965169	6.08551547137451	12.1140249978739	4.82406816274079e-23	2.17130158968813e-22	41.441298527195
KDM1A	1.05448523323567	6.6210069979248	12.106206011016	5.04442266917568e-23	2.26871088987858e-22	41.3967207549968
C3	-1.93510657971191	8.2540197428894	-12.1040086615155	5.10814266253646e-23	2.29647271727995e-22	41.3841928384884
QSOX1	-1.09501229931642	9.95092466833496	-12.1030692073795	5.13563079518765e-23	2.30793045520967e-22	41.3788366113709
C15orf38	-1.27060300081381	8.63504675354004	-12.0911271992279	5.49823098440103e-23	2.46836468723125e-22	41.3107477882193
SNORA80B	1.83575041186523	7.68612148895264	12.0763196235371	5.98363249044868e-23	2.67961661683768e-22	41.2263145661681
LOC100505839	2.51493628100586	5.70188030413818	12.0685117518447	6.25662112135788e-23	2.80077948217057e-22	41.1817912133744
PEA15	1.09857152827962	7.51243324465942	12.0676028753739	6.28919787409011e-23	2.8142695611272e-22	41.176608348348
FER1L4	2.82458547294107	8.17495894168091	12.0674985000308	6.29294984007553e-23	2.81485575500778e-22	41.1760131467412
IFFO2	1.53225742618815	8.31875608221435	12.0669263314641	6.31355734797253e-23	2.82297810512333e-22	41.1727503431255
TAF2	1.0438705016276	6.46275753393555	12.0415563027347	7.29853577842057e-23	3.25203795585056e-22	41.0280675921807
PDGFA	-1.38927509358725	8.49868591198731	-12.0385063652078	7.42686452014964e-23	3.30793923198473e-22	41.0106728510306
VAV1	-1.24696631624349	7.90939948571777	-12.0377449932793	7.45925066450074e-23	3.31979854863706e-22	41.0063304690581
VEGFA	1.33415021931966	9.84335787432861	12.0314795723425	7.73118537450907e-23	3.43817028595548e-22	40.9705958622436
PGF	1.44877304410807	6.92779574743652	12.0294579684777	7.82102840698567e-23	3.47678343414284e-22	40.9590654793136
SNHG7	1.29621966805013	7.75495531732178	12.0230871021707	8.11105275801516e-23	3.5987723303172e-22	40.9227279716815
GYPC	-1.09837823811849	7.16831076867676	-12.0200458638988	8.25327279033249e-23	3.65928044739144e-22	40.9053812622463
SLC2A8	1.4519731508789	8.82803401428223	12.0200351678102	8.25377736029994e-23	3.65928044739144e-22	40.9053202531091
MUC2	-1.84103681754557	9.74706384631348	-12.013314027172	8.57702066343701e-23	3.7996663023612e-22	40.8669830899909
LOC645249	1.67984554622396	7.37641601538086	12.0120949314137	8.63699469990461e-23	3.82476519038803e-22	40.8600292746399
FPGS	1.03969307076009	7.16013234439087	12.0119722896518	8.64305131446286e-23	3.8259774386257e-22	40.8593297143961
CDHR2	-2.14520365405274	9.36050160430908	-12.0100484192206	8.73861923712503e-23	3.86531327499387e-22	40.8483557208943
CYP2B6	2.33488777197266	9.30734400354004	12.0088247467915	8.79995456958807e-23	3.89095037681786e-22	40.8413756900805
HOXB13	-2.7642885127767	12.6033018604126	-12.0031878634945	9.08810962343355e-23	4.01527940319351e-22	40.8092214431818
GPX3	-2.28686191642253	7.72349084625244	-11.9917424607197	9.7025801679188e-23	4.28347918788204e-22	40.7439312440523
PAQR8	-1.65217691276042	8.93944196459961	-11.9911121617542	9.7376023459733e-23	4.29729487909779e-22	40.7403356069209
KIF3A	1.05178879988606	6.96156657000732	11.9877126833686	9.92868555467517e-23	4.37659496706465e-22	40.7209425783175
ERO1L	1.00671778336588	9.18415393933105	11.9856321980042	1.0047475488513e-22	4.42557317371377e-22	40.7090738669973
THEM4	1.08600480721029	6.73041227667236	11.9829459834094	1.02029575272687e-22	4.49234115419502e-22	40.6937494340457
KLRC1	-1.73344850146485	6.73197415637207	-11.972566434686	1.08267106050401e-22	4.75970606957656e-22	40.6345339528093
HDC	-1.75451336608887	6.40841954043579	-11.9721698777148	1.0851284071262e-22	4.76869048758817e-22	40.6322715334915
MT1G	-3.614535974528	12.2681586100464	-11.9678155990253	1.11248057114217e-22	4.88330675687577e-22	40.6074294266546
HHIP	-2.41047208902995	7.29964489758301	-11.9655863797836	1.12674981134434e-22	4.94405979267842e-22	40.5947110563441
CPAMD8	-1.38204497241211	6.79340498980713	-11.9647510961285	1.13214352164637e-22	4.96583651979367e-22	40.5899454773672
CD36	-1.77565636824545	7.01282376568604	-11.9620564114051	1.14972081610364e-22	5.0410162979181e-22	40.5745712570535
GSTZ1	-1.14393916235352	8.78044106634522	-11.9547085601045	1.19905088847559e-22	5.25331037303616e-22	40.5326479757822
CHMP2B	-1.07745910758464	9.46929508557129	-11.952656125227	1.2132046867264e-22	5.31330183278692e-22	40.5209375312118
EVL	-1.498459453125	9.13841767602539	-11.9476446452364	1.24847103530041e-22	5.46152775100866e-22	40.4923434084057
DEFB4A	2.96306401529948	5.01937139648437	11.9464335618813	1.25714639574541e-22	5.49739245210825e-22	40.4854332061193
ZEB2	-1.89820980126954	6.50388340270996	-11.9437432031871	1.27663477074994e-22	5.58049639834453e-22	40.4700824198563
B9D1	1.3113415378418	6.54073217303467	11.9271124584446	1.40399939176198e-22	6.1186771224349e-22	40.3751858901639
AMICA1	-1.55316582381185	10.056621277771	-11.9228149278546	1.43893057782603e-22	6.26853846205618e-22	40.3506626936425
SNORA22	1.33939991943359	6.79325336120605	11.9215780893672	1.44914410556056e-22	6.31064756509126e-22	40.3436047825764
[truncated: 804 more rows]
