# Supplementary material for: Exploring the pathogenesis of colorectal carcinoma complicated with hepatocellular carcinoma via microarray data analysis
Source: Front Pharmacol. 2023 Jun 13;14:1201401. doi: 10.3389/fphar.2023.1201401 (PMC10293624; doi:10.3389/fphar.2023.1201401)
Supplement: Supplementary file 2 [file Table3.XLS]

id	logFC	AveExpr	t	P.Value	adj.P.Val	B
CLEC1B	-4.18077173192971	5.88301233696657	-24.8839542597436	2.04593155283896e-41	4.43005559136221e-37	83.3112147476459
CLEC4G	-4.02853117539788	5.33845509347338	-22.7232497029737	1.99469727225414e-38	2.15955900180595e-34	76.6694786019256
OIT3	-4.31189238019452	5.91232152675386	-22.2174699790876	1.06933204001808e-37	7.71808222083719e-34	75.0426284087993
FCN3	-4.70496819875479	7.76362257616594	-22.1271669516376	1.44724629498741e-37	7.8343060063406e-34	74.7491717415155
FCN2	-2.37337152953691	4.94217323510371	-21.7971632879201	4.40610410032621e-37	1.70168510105975e-33	73.6689443648484
ECM1	-2.78501388405357	7.02868836193685	-21.7771694745122	4.71533302838337e-37	1.70168510105975e-33	73.6031001630046
HHIP	-1.68986161177424	3.82005080776853	-20.4616511171287	4.50489629723871e-35	1.39349313605871e-31	69.1689025469827
CXCL14	-3.14547498012452	4.94087613357115	-19.5026959636647	1.41549037166279e-33	3.8312016272018e-30	65.8063045403167
STAB2	-1.39505029827955	4.26504496010041	-19.4499629287909	1.71630401675224e-33	4.12923676385958e-30	65.6181187577016
CLEC4M	-3.11730975600501	4.91321547826661	-19.267363749647	3.35340549485786e-33	7.26112891801573e-30	64.9638120100151
CRHBP	-4.00021625789309	5.53334113224997	-19.1823582111688	4.58662651137228e-33	9.02856580461308e-30	64.6577917114218
RSPO3	-2.36753002858827	4.41935718139781	-18.5922744786452	4.13061582089155e-32	7.03688512898757e-29	62.5083974084289
CFP	-2.60545598544798	6.14445690104373	-18.5862798153196	4.22479594868325e-32	7.03688512898757e-29	62.4863351538313
LINC01093	-4.45680096227527	5.96629505780156	-18.4154340404133	8.04719218515574e-32	1.24461323132269e-28	61.8556397050487
PAMR1	-1.57479434371316	5.51345685486854	-17.7366185995804	1.07874890783468e-30	1.55721000675629e-27	59.3126309719812
CNDP1	-4.17364305653183	6.32732303084952	-17.708594168481	1.20224292600347e-30	1.62701037979706e-27	59.2063621338326
RACGAP1	3.1573241041022	6.36066640005285	17.6371929152405	1.58531350708984e-30	2.01922313935391e-27	58.9351459529084
NAT2	-4.00546620422561	6.98643351803409	-17.5770088641746	2.0025406830458e-30	2.40894518944393e-27	58.7060220319936
TTK	3.2577494025291	4.8074329015722	17.1608516785408	1.01997112235768e-29	1.16239130065321e-26	57.1087298966798
GPM6A	-1.73960969120248	4.26979322843176	-16.9009148863422	2.85099474419597e-29	3.08662945980376e-26	56.0995090760217
PRC1	3.18578143549219	5.69412170755714	16.7383346368958	5.44619844500265e-29	5.61554928236392e-26	55.4637568205141
MARCO	-3.07492677913167	6.01756481490289	-16.6881399363789	6.6553768433398e-29	6.55040339949258e-26	55.2667713819832
LCAT	-1.69515396671456	5.51735716012683	-16.6100988308075	9.09570212015778e-29	8.40287665531497e-26	54.9598440219396
ANGPTL6	-2.13311238633768	5.78830036391862	-16.6041902427063	9.31367661421324e-29	8.40287665531497e-26	54.9365734139795
GPR182	-1.29535520066128	4.65611321171885	-16.4349091576421	1.83908684256993e-28	1.59286989608667e-25	54.2679106445939
CCNB1	2.76262030760021	4.81614854194742	16.3324216581034	2.78140029106398e-28	2.31637155778494e-25	53.8612421108533
CDKN3	3.20317330153993	5.46475173695336	15.8392110393551	2.07484245309071e-27	1.66394680136197e-24	51.8847568280499
NDC80	2.81772753260389	4.79046334410094	15.7388051443513	3.13543932403883e-27	2.42470241726474e-24	51.4784503869843
CDHR2	-2.44376761942787	6.91021001869468	-15.5579284597225	6.61803744781312e-27	4.94139189163785e-24	50.7431479906066
CD5L	-2.92062300519452	6.65636751909103	-15.520935507797	7.71444180800865e-27	5.56802694896038e-24	50.5922320310969
IDO2	-3.29986342304929	5.07790411864183	-15.475557387299	9.31265556982575e-27	6.50473971140119e-24	50.4068616985107
ECT2	1.19782193167919	3.76495053421852	15.267416169672	2.21609480180012e-26	1.49770418495048e-23	49.553128354502
GINS1	3.21759871803161	5.54085426397146	15.2603448150971	2.28255844933108e-26	1.49770418495048e-23	49.524023725197
DNASE1L3	-2.74483315391984	6.36414305654644	-15.2351234887094	2.53639966832028e-26	1.6153135887688e-23	49.4201630823487
CENPW	2.45263892558208	6.18097981496895	15.2004159485655	2.93288705185144e-26	1.81445152382112e-23	49.2771020186486
TTC36	-3.86547431000405	7.15235586992998	-15.1815413127886	3.17413944570552e-26	1.90915670605171e-23	49.199236297987
STMN1	1.03574569925214	4.39306609961686	15.0499574548121	5.51448386813193e-26	3.22716538369353e-23	48.6551013182475
BCO2	-3.43488729759799	6.56251447344431	-15.0222088009017	6.19743967559513e-26	3.53139898146477e-23	48.5400638564833
VIPR1	-2.1631161944076	6.1608528893513	-14.9799629901639	7.40444742615387e-26	4.11098718252589e-23	48.3647324496412
BUB1B	2.78033312544209	5.82294707068305	14.5258531140692	5.0856816805991e-25	2.75300663575031e-22	46.4654015635938
RFC4	2.17214672889957	6.56499452298851	14.4425838491554	7.2613423749199e-25	3.83487430351562e-22	46.1142334549586
CETP	-2.73672458151893	5.61498343704585	-14.4012142841256	8.66957040460498e-25	4.4695763802598e-22	45.9394363968767
PLAC8	-3.28031312332376	5.58871652774475	-14.3457826749093	1.09973850156091e-24	5.53782273820894e-22	45.7048801227292
LIFR	-1.8507631529804	4.83992555397014	-14.2208707003736	1.88215994272969e-24	9.26236573634681e-22	45.1748836423762
LPA	-3.35756394756668	6.32498664902893	-14.1959624629385	2.09551756341242e-24	1.00831648445709e-21	45.0689616462174
TOP2A	2.73362780526083	4.86240404227771	14.1876767343033	2.17175943648928e-24	1.02228493648483e-21	45.0337092307015
MRO	-1.1870267701702	4.29699584357247	-13.9397534926613	6.3518226038905e-24	2.86533364254252e-21	43.9748859439759
IGFALS	-2.1007351960378	6.70819737607346	-13.8790568769494	8.26992015897333e-24	3.58137162404499e-21	43.7144887803952
CENPF	1.47551885390878	4.47011488756771	13.753919112539	1.42688097031487e-23	5.96924771043917e-21	43.1761826177767
PTH1R	-1.75420112566313	5.58278974071872	-13.7528554002856	1.43352367312999e-23	5.96924771043917e-21	43.1715985167036
FLJ22763	-3.27827849175693	5.51975801103184	-13.7232756381941	1.63125088160609e-23	6.6644293093239e-21	43.0440676180914
DCN	-2.20288690421456	5.65462124441802	-13.7154261284929	1.68818388229647e-23	6.76930474136397e-21	43.0102069197364
GPD1	-1.32236131633142	5.37018698064474	-13.6483939001589	2.2635113184564e-23	8.91123828700661e-21	42.720738653685
NCAPG	2.48368823839523	4.9953550995508	13.5563139890359	3.38934814350408e-23	1.27915712294552e-20	42.3222073867061
ASPM	2.31188762343428	4.37837137019421	13.5543824610825	3.41821026961305e-23	1.27915712294552e-20	42.3138364446081
STIL	1.81688305560161	5.19875270795349	13.5538396004717	3.42636646796471e-23	1.27915712294552e-20	42.3114836891982
AURKA	1.86739562632626	4.96419651473114	13.5488355779782	3.50247759363552e-23	1.28540927686424e-20	42.289794587471
RCAN1	-1.28037183213601	6.02884743361078	-13.5250292918204	3.88853741246159e-23	1.40330834320051e-20	42.1865684519888
AADAT	-2.23623081309866	6.10396016058925	-13.5210345021891	3.957393794357e-23	1.40474504638053e-20	42.1692399399164
NEK2	1.6794403468354	4.45415769150482	13.5131851606232	4.09628365668184e-23	1.43059403255051e-20	42.1351855860758
KIF4A	2.64932428355254	5.0804332175981	13.5076279173365	4.19757182559823e-23	1.44269877364569e-20	42.1110709708247
KDM8	-1.04211335389957	5.87029047318008	-13.4576532399905	5.2295574711294e-23	1.76930637378695e-20	41.8940469400697
MS4A6A	-1.75616007622311	6.21112996855595	-13.4279093835191	5.96136024869557e-23	1.95577777977281e-20	41.7647354336654
EZH2	2.37604991122347	5.44873549537588	13.3845355173542	7.21725211001402e-23	2.33246507370349e-20	41.5759761949899
COLEC10	-1.76879178356174	4.62552737759281	-13.3763642751685	7.4821089771997e-23	2.38250155416625e-20	41.5403903318877
GMNN	2.32392556067639	8.35384586504162	13.1697395847766	1.86611378002666e-22	5.85501124473429e-20	40.6378874245863
PTTG1	2.37730009994843	7.43833954188136	13.149369144038	2.04260582298388e-22	6.15552658040138e-20	40.548638588628
BDH2	-1.71514594265767	6.3134200329634	-13.1489046949819	2.04681990388814e-22	6.15552658040138e-20	40.5466031325826
CYP26A1	-3.16996090758547	6.34527723371647	-13.1174704349864	2.35333257587005e-22	6.98037126922111e-20	40.4087830426015
MELK	2.37112294672856	6.00253449993394	13.0812846813863	2.76381115820842e-22	8.08713554171445e-20	40.2499871436584
RRM2	3.20957406334733	6.61518524626767	12.9855646992321	4.23179045847145e-22	1.2217461172971e-19	39.8291981726202
PBK	2.64859559898136	4.45867883960893	12.9435571445907	5.10342812483322e-22	1.4351237556755e-19	39.6441961613091
KBTBD11	-1.77658887351717	4.47716004974237	-12.8938198338289	6.37203320823124e-22	1.7465017095928e-19	39.4248897157759
SIGLEC1	-1.43946488631005	5.70460439252213	-12.8798978350374	6.78090144686066e-22	1.83533573786092e-19	39.3634527554387
DTL	2.54787358649241	5.4423648552649	12.8636454420063	7.29171697154357e-22	1.9492289825288e-19	39.2917038971267
HMMR	2.37630670306514	4.97668391663364	12.8593412257227	7.43336562226489e-22	1.96286177827929e-19	39.2726971814602
NUSAP1	2.65183524211612	6.18995617307438	12.8549932638304	7.57926371903158e-22	1.97727466636374e-19	39.2534951490427
LYVE1	-2.34551917926614	4.62363356790857	-12.8447172135731	7.93563156318204e-22	2.04559797901882e-19	39.2081041697212
RAD51AP1	2.13302370790967	4.90846733280486	12.8369329010002	8.21676381735976e-22	2.09314808161519e-19	39.1737116030417
CYP2B6	-2.52858431593538	6.67095776674594	-12.7867991347519	1.02835836266141e-21	2.56920046194056e-19	38.9520464289697
HAMP	-5.50208493837496	8.06631284007134	-12.7859483530563	1.03228393381438e-21	2.56920046194056e-19	38.9482822647589
CSRNP1	-1.76704154032199	6.78532555040296	-12.7618150684491	1.15013918443482e-21	2.82999588188263e-19	38.8414739208917
FLVCR1	2.16050090848807	6.1633381732065	12.7584864798123	1.16742327074021e-21	2.84024899790313e-19	38.8267372059433
ZWINT	2.72716551971891	6.42077519817677	12.7195030324757	1.39038637447502e-21	3.30835562269315e-19	38.6540524737979
NGFR	-1.55979165215148	4.8827659408112	-12.6973824252426	1.53546570784505e-21	3.61385206217052e-19	38.5559892232829
NUF2	2.71420860199308	4.36919601486326	12.6398621616932	1.98807913053906e-21	4.62880402296369e-19	38.3007397859061
APOF	-3.93669041132478	7.1006391954023	-12.596124445382	2.42018548521254e-21	5.57492301184119e-19	38.106405675289
ACSM3	-2.67135215251989	6.0747166373365	-12.5911481919595	2.4749841281548e-21	5.64114013967747e-19	38.0842819621196
FOXM1	2.14146468260942	5.34360738353812	12.5848547931791	2.54607733221036e-21	5.74273046607822e-19	38.0562985058404
CHST4	-1.41791682508105	4.7388147798256	-12.5635515238765	2.80232337833923e-21	6.25553691867828e-19	37.9615416975158
HJURP	1.73249060678235	5.01668248685427	12.5108159859272	3.5538908875478e-21	7.77296963515883e-19	37.7267606566031
KPNA2	1.90180969788904	8.27885947139649	12.4480275143434	4.71767486008096e-21	1.02151813745333e-18	37.446829126537
FAM65C	-1.3318155197097	4.59059979283921	-12.4330534401089	5.04770629475518e-21	1.08215826138944e-18	37.3800069116505
ANLN	2.25676675405246	4.1456069704056	12.3994234816331	5.87603142589837e-21	1.24738929867625e-18	37.22984451377
SGOL2	2.14180313840996	4.67367518747523	12.3606320419953	7.00271085439887e-21	1.4721329915563e-18	37.0564851923042
UBAP2L	1.05674223325597	6.80806746128947	12.3373692536087	7.78008701686914e-21	1.61982907861796e-18	36.9524467776485
CDC20	2.81985232729148	5.70197503910688	12.3301782555679	8.03751579623233e-21	1.65748885272208e-18	36.920274795673
CXCL12	-2.93954158727527	7.72156191029198	-12.2786970881533	1.01484781073132e-20	2.07306600431747e-18	36.6897925928227
TM6SF2	-1.23129241639037	5.73493612128419	-12.2702067320137	1.05466719937422e-20	2.1342718568271e-18	36.6517543392112
MOGAT2	-1.72764892849248	5.55053485348131	-12.244433959614	1.18542109791574e-20	2.3766595401083e-18	36.5362417058766
SLC25A47	-3.17928654063513	7.29929142674065	-12.1533337829394	1.79276100673248e-20	3.49891704860268e-18	36.1273811732874
CDCA3	1.52628015159888	5.53544829937905	12.1532242841111	1.79365350018426e-20	3.49891704860268e-18	36.1268892240253
KIF14	1.91986314054671	4.87927017214956	12.1175493665776	2.10954650705873e-20	4.07839379619131e-18	35.9665459385209
PLIN1	-1.75321940072392	6.34613683181398	-12.0905039672872	2.38580581119891e-20	4.57166842742389e-18	35.844902139585
FIGNL1	1.36000571734085	4.88782968489893	12.0677157712384	2.6466272366656e-20	4.98325387439306e-18	35.7423486642256
FAM13A	-1.48453283062555	5.77952714414057	-12.0474189831421	2.90297451868185e-20	5.41880234939812e-18	35.6509631140727
INMT	-2.11112251134689	5.68231833075704	-12.0274736157842	3.17918463835875e-20	5.88366538242582e-18	35.5611194830385
KIAA0101	1.74161622971928	6.0374729437178	12.0162453748928	3.34614149951257e-20	6.14016965160557e-18	35.5105244951601
KIF18B	1.52708795097444	5.86787846941472	11.9691779730309	4.14745938640286e-20	7.54663345325892e-18	35.2982998247468
KIF20A	2.34067906899315	5.44559778695997	11.8907063911304	5.93523671233824e-20	1.06211306225008e-17	34.943988921337
DLGAP5	2.46868071470675	4.6134256106487	11.880756888617	6.21143952101794e-20	1.10242868810329e-17	34.8990224175418
MASP1	-1.32289977123858	5.96048832249967	-11.8636493640799	6.71688605479094e-20	1.18244498979177e-17	34.8216829684565
UBE2C	2.13389781129347	7.00553397192496	11.8598119358042	6.83582318704568e-20	1.19367806023468e-17	34.80433088696
GPR128	-2.18614324105696	4.64751065391729	-11.8564637895252	6.94132257751675e-20	1.20240366216776e-17	34.7891900778789
CTB-167B5.2	-1.81919810461796	3.94618093446955	-11.8354855303157	7.64061043712422e-20	1.31303283964326e-17	34.6942986977093
CYP1A2	-4.29335741401415	8.38648719421324	-11.8330560835233	7.72603687552881e-20	1.31725886980965e-17	34.6833067952276
MYO1F	-1.18567849455681	6.30973278814903	-11.7843960679159	9.65435978189987e-20	1.6331707215428e-17	34.4630281419
GGT5	-1.49091927954612	6.08753107358964	-11.7724674518208	1.01967046256251e-19	1.71154453688883e-17	34.4089941491047
STEAP3	-1.82102529454023	6.28666689496631	-11.7074533830876	1.37382208181755e-19	2.28825919519965e-17	34.1142588071956
CYP39A1	-2.47128320397693	5.66795433102127	-11.6780663796588	1.57220163510572e-19	2.59869328282016e-17	33.9809057484915
AXL	-1.01687706856027	5.67648854749637	-11.6749527047888	1.59483888908969e-19	2.60499792564465e-17	33.9667717429868
ZMYM1	1.21531771146478	4.93251884964989	11.6632363881883	1.68299277154792e-19	2.7041219068863e-17	33.9135794530235
CDK1	1.69982703768789	4.66350596538512	11.6628554873587	1.6859393960636e-19	2.7041219068863e-17	33.9118499435764
SUCO	1.47555931117374	6.93483385116924	11.638367080164	1.88667133552919e-19	2.9819047027893e-17	33.8006304166529
SNRPD2	1.13834086640695	10.0251296751883	11.6179004599344	2.07274193781798e-19	3.25225225938933e-17	33.7076345348635
SPDL1	1.49221817828986	4.6542770625578	11.598038140148	2.27093036846134e-19	3.53758670994917e-17	33.6173479351248
GBA3	-3.63468427538313	7.79275241128286	-11.5741959639175	2.53413187672731e-19	3.89159982459408e-17	33.5089231599853
BIRC5	1.41269878111185	4.89272945659929	11.5687089367934	2.59891948392692e-19	3.96298616799082e-17	33.4839630676248
SRPX	-2.94353015245543	5.40298338287753	-11.5431324088317	2.92356383846274e-19	4.42684809749886e-17	33.3675815823504
TOPBP1	1.15514167383215	7.10030925181662	11.5357393907052	3.02477929973617e-19	4.54830181786023e-17	33.3339300423333
NPY1R	-2.24187917722148	4.10045192403224	-11.5075697779307	3.44376387439864e-19	5.10738487481875e-17	33.2056629949572
DPT	-1.43263116395888	4.85910010774211	-11.5020197508386	3.53294669867714e-19	5.20400645350042e-17	33.1803832928478
GSTZ1	-2.20928139824638	7.8999672235434	-11.4906638328498	3.72271745567873e-19	5.44648655863591e-17	33.1286499802665
UHRF1	2.35122281312629	5.73581775690316	11.4813226772679	3.88646923682398e-19	5.64790056274829e-17	33.0860866528907
CENPK	1.92285765042919	3.92477957827983	11.4782789623588	3.94137325231888e-19	5.68950366883072e-17	33.0722161940621
ZWILCH	1.29212958550693	5.44722381080724	11.4373651047212	4.75965070444473e-19	6.78031030943038e-17	32.8856897232949
TACC3	1.59594199065171	5.61915552681992	11.4267920723884	4.99755009871917e-19	7.02744443313514e-17	32.8374635344346
HGFAC	-3.23778897097885	6.92835926800106	-11.4255010241644	5.0274057331468e-19	7.02744443313514e-17	32.8315740844411
LILRB5	-1.52769682195881	5.11794874957062	-11.4036833376344	5.55991099868654e-19	7.71722774708715e-17	32.7320253209642
MKI67	1.51036535631263	4.7110139507861	11.3609164572777	6.77370464879815e-19	9.16693917252665e-17	32.5367721419986
GLYAT	-3.04644179109564	7.01383592191835	-11.3294328816783	7.83432640054579e-19	1.04439147907345e-16	32.3929339449826
ASPA	-1.56106290253831	4.71642263231603	-11.3282683931274	7.87660439587193e-19	1.04439147907345e-16	32.3876121754473
SLC9B2	-1.32756168674477	5.37639683036068	-11.3160070075394	8.33591314720092e-19	1.09392440834146e-16	32.331570145766
CDC37L1	-1.46168311381889	5.86084186352226	-11.3047564178793	8.78097996783844e-19	1.14538891110606e-16	32.2801370150136
FANCI	1.25236430165046	4.45301326516052	11.2971932048069	9.09351015371827e-19	1.17905254705666e-16	32.2455551460049
PEMT	-1.71878445140731	8.1845419911481	-11.2779048720905	9.9420513982565e-19	1.28140023170505e-16	32.1573401105017
UBE2T	2.06562610611001	4.98004355648038	11.2587794230554	1.08619149212135e-18	1.38348849287669e-16	32.0698396944513
BARD1	1.12927963778367	4.48417366045713	11.2560510961868	1.0999924825563e-18	1.39287352191763e-16	32.0573549367763
IGF1	-2.53101886678455	6.25801755330955	-11.2177706533232	1.31326544243975e-18	1.65326375727604e-16	31.8821204793258
TPX2	2.05019888237732	5.82093570993526	11.189412374106	1.49761432764369e-18	1.86366914002695e-16	31.7522296793411
CYP2C8	-2.30031641394047	6.79059657444841	-11.1757604715203	1.59541281363641e-18	1.96341248474949e-16	31.6896761963723
IL18R1	-1.10287787889589	4.28372820445237	-11.1756943571127	1.59590171022912e-18	1.96341248474949e-16	31.6893732216907
NAPSB	-1.17478158386752	4.38853837931034	-11.1731461705426	1.61485983060597e-18	1.96564491706926e-16	31.6776956827939
TOMM40L	1.77496960057471	6.07988595587264	11.1726981709313	1.61821616805904e-18	1.96564491706926e-16	31.6756425877792
SF3B4	1.37554573540193	8.05471764770776	11.1688658412219	1.64721497673586e-18	1.98150810507009e-16	31.6580791137612
ANKRD55	-1.29259051286656	3.53145554108865	-11.1660390173319	1.66893899717138e-18	1.99654895611889e-16	31.6451230998523
ACAA2	-1.24416903072502	7.44273395534417	-11.1522720514019	1.77891929874444e-18	2.11123499352176e-16	31.5820167198892
GCKR	-1.69968220391247	7.96936927579601	-11.1495276940354	1.80169797750033e-18	2.12022642971818e-16	31.5694350696004
TRIP13	1.99044353921677	4.78806456982428	11.1401252019232	1.8819834505463e-18	2.20273446782048e-16	31.5263243447457
ZGPAT	-2.00169525939434	8.25841298361739	-11.131687710066	1.95708171801832e-18	2.27831669033606e-16	31.4876322519803
NNMT	-1.68693408315834	4.60980668370987	-11.1245203027101	2.02323378496301e-18	2.34273161207508e-16	31.4547600398737
SOCS2	-2.31708169074197	5.75910345356058	-11.097061319785	2.29811658776005e-18	2.64686800397704e-16	31.3287865222558
DNAJB11	1.03039072749042	8.69159360635487	11.0893668873956	2.38166032487272e-18	2.72494802823002e-16	31.2934762884861
SAC3D1	1.93784727382663	7.09319171046373	11.0721493734333	2.57981225874211e-18	2.92464266170382e-16	31.2144474896296
DAK	-1.68319553243811	6.23366989840137	-11.0505280080361	2.85225260962191e-18	3.21665759146579e-16	31.1151727066456
MAN1C1	-1.9668069960949	6.40407166204254	-11.0475651552524	2.89177063172013e-18	3.24432691650963e-16	31.1015659510725
POLA1	1.31651495297304	5.47956351988374	11.0186553338515	3.3074099407309e-18	3.69151275498176e-16	30.9687641195989
ADH6	-2.41435066165635	8.17360723530189	-10.9899307757723	3.77977155144022e-18	4.15448697478858e-16	30.8367511219116
ETFDH	-1.86465024043988	7.31758706539834	-10.9813474482578	3.9336462545321e-18	4.30177991663553e-16	30.7972917388598
TMEM27	-3.1827427379163	5.87003150799313	-10.9509163203721	4.53163476928495e-18	4.90617438296635e-16	30.6573495634
DIRAS3	-1.55912653001584	3.87206811223411	-10.9208733913085	5.21146064451801e-18	5.58632462058161e-16	30.5191261884366
OIP5	1.72029872277483	4.57488683069098	10.9174447697049	5.29528244642621e-18	5.64821432573728e-16	30.5033474172689
SRD5A2	-2.63399788768236	6.0400358020214	-10.9119990292861	5.43120761053507e-18	5.76480090151548e-16	30.4782839752472
FYN	-1.58878353938255	6.53116469150482	-10.8873721877538	6.09095417717962e-18	6.37137346852513e-16	30.3649150123279
CENPM	1.70351953941939	5.28566819593077	10.8851380524033	6.15464625063879e-18	6.40704592620585e-16	30.3546280935465
MT1F	-3.40967778553271	9.87289912009513	-10.8638663521738	6.79556356327575e-18	7.04039893950286e-16	30.2566663420204
CKS2	2.12254454002726	7.56272013938433	10.851053203249	7.21351647248598e-18	7.43782248470185e-16	30.1976430528486
MCM2	2.02180800801283	6.33502134674329	10.817543360586	8.43262091343574e-18	8.5723727999354e-16	30.0432271088091
MCM3	1.70286284609858	7.16315494662439	10.8138605254284	8.57862713824667e-18	8.68004735628295e-16	30.0262515816678
CPEB3	-1.19007557088122	4.86998589959043	-10.8036124493606	8.99839940328259e-18	9.06243452461758e-16	29.9790095686534
CCDC34	1.01806328544062	4.39493918622011	10.7896159416056	9.60520453900669e-18	9.62877286495888e-16	29.914476277261
SPRYD4	-1.44769894890215	7.25318733485269	-10.7883955388799	9.66002105278517e-18	9.63909842654181e-16	29.908848769645
ACAA1	-1.42361997367743	9.67815456123662	-10.7751883628517	1.02737017469259e-17	1.01578294030222e-15	29.8479415272449
OLFML3	-2.3369895191755	5.76554483115339	-10.7630618524323	1.08715553855903e-17	1.07000813074631e-15	29.7920076000023
UBE2S	1.76217869117485	5.82857318357775	10.7518389162207	1.14559180627255e-17	1.12242078648053e-15	29.7402326484708
EXPH5	-1.61162359932213	4.85106061157352	-10.7429787383927	1.19394318307126e-17	1.15412730995723e-15	29.6993519110707
CDCA5	1.56390161289788	5.71458266706302	10.7305261469728	1.2653793912204e-17	1.21774488702646e-15	29.6418870201129
CYP2C19	-2.87201740513557	6.32255814665081	-10.6938974205845	1.50134503849899e-17	1.41341843993994e-15	29.4727976027866
MCM6	1.1039853551061	5.1969095625578	10.6923326237721	1.51235512656226e-17	1.41762015391569e-15	29.4655720746036
VPS72	1.17252310393642	7.45507990276126	10.6590923805355	1.76635692271322e-17	1.64149898916349e-15	29.3120463547266
THRSP	-3.52128070918066	6.76815879204651	-10.6366833465554	1.96132959872227e-17	1.81490041885185e-15	29.2085067054261
PLVAP	1.62789706617485	6.91234770081913	10.6325362100748	1.99971189030667e-17	1.84254304514086e-15	29.1893416310953
SKAP1	-1.50356740671972	6.32094408270577	-10.6070859821649	2.25232200781823e-17	2.05915044261044e-15	29.0717055274091
ZG16	-2.25641522569444	6.77465992145594	-10.6069441976473	2.25381542926465e-17	2.05915044261044e-15	29.0710500580902
RHNO1	1.11860112170277	4.84653813198573	10.5641643882937	2.75295890666627e-17	2.48374246691853e-15	28.8732229143306
CENPE	1.49411700594054	4.41261998308892	10.5593211908244	2.81604028139315e-17	2.53011287190896e-15	28.8508194636587
C7	-2.29087763485485	6.06532690791386	-10.5568287090218	2.84906708151555e-17	2.54920865768827e-15	28.8392893011088
GPSM2	1.0559833814471	4.23515996023253	10.5543268430359	2.8826088674923e-17	2.56860616493048e-15	28.827715352806
MIS18A	1.09796511416888	4.80022086021932	10.5480873412738	2.96799553532709e-17	2.63385275928022e-15	28.7988489968385
ASPG	-1.14681407605732	5.86004592178623	-10.5447107859914	3.01525617229906e-17	2.66487109790985e-15	28.7832267728036
HAND2-AS1	-1.07830174865532	3.41360328986656	-10.4764113950572	4.15115199387707e-17	3.63906453940972e-15	28.4670838420285
RMI1	1.24692570220859	6.38291948969481	10.4707616382478	4.26244983364494e-17	3.70661952802867e-15	28.4409202738687
CNOT6	1.05841699578176	6.24354636372044	10.4578379534661	4.52842202412525e-17	3.92215688353536e-15	28.3810649185056
ASPDH	-1.26737969801798	6.21839778656361	-10.4536685164914	4.61773170244276e-17	3.96776764099179e-15	28.3617523810339
CAP2	2.1018440062629	6.14643671845686	10.4442338896061	4.82639625600253e-17	4.13067028186651e-15	28.3180482517563
HELLS	1.43648659083039	3.93999911230017	10.4341198097189	5.0606002344195e-17	4.29714419121119e-15	28.2711911616014
MT1G	-2.44255325698128	7.63075242865636	-10.43257401855	5.09738535186819e-17	4.31147207125007e-15	28.2640292303856
ITGA6	1.17372677998821	6.14574152966046	10.3677161070456	6.90836743163789e-17	5.79794108516493e-15	27.963413067399
SPC25	1.52179226076665	3.48902734826265	10.3616742222365	7.10689236043564e-17	5.94152665175726e-15	27.935397445999
C3P1	-3.27655255604369	8.88059258917955	-10.3513228463999	7.4604038732602e-17	6.19273340222495e-15	27.8873946698785
CYB5D2	-1.20829510051945	6.43158213773286	-10.3512037997063	7.46457035043972e-17	6.19273340222495e-15	27.8868425780103
RNASEH2A	1.54340267091254	6.18158365338882	10.345388038598	7.67098037997385e-17	6.3396846628845e-15	27.8598704569591
TCF19	1.63337387197907	5.25160980882547	10.3437528790751	7.73003841426125e-17	6.36420234920148e-15	27.8522866568994
C1orf162	-1.56737905565687	6.52842071951381	-10.3333428463527	8.11686080114539e-17	6.65736314118186e-15	27.8040021121191
CCT6A	1.18243142779251	8.35918891359493	10.3165555281295	8.78195295735305e-17	7.1756840522855e-15	27.726126217905
E2F8	1.71458914294135	3.80663802596116	10.2903992908925	9.92877118123667e-17	8.05197312312051e-15	27.6047595909171
LST1	-1.06980519300766	6.05498402378121	-10.274859832892	1.06799946849889e-16	8.6288777953009e-15	27.5326392635942
MT1M	-4.50256682287062	7.40034364856652	-10.2402475436911	1.25644580227045e-16	1.01136880879412e-14	27.37195719792
PRIM1	1.67307695724654	5.97190557352358	10.2325207385303	1.30287246208727e-16	1.04099990485519e-14	27.3360788194562
CFHR3	-2.03606403820365	6.08790814308363	-10.2286655618573	1.32667542325949e-16	1.05612143161168e-14	27.3181767602007
ATAD2	1.74219934736958	6.07644778345885	10.2175644886293	1.39767928335567e-16	1.10856957957877e-14	27.2666234150352
IL2RB	-1.03371766270631	5.93810691082045	-10.2049770177428	1.48280949130924e-16	1.16753723328432e-14	27.208160226534
RAMP3	-1.47942308010057	6.11693284277976	-10.2015573728583	1.50682163343518e-16	1.18214524741927e-14	27.1922762228239
PRELP	-1.0363384405025	5.76477309353944	-10.1986437910933	1.52758751701376e-16	1.19411019876891e-14	27.178742417221
C9	-5.23110138456012	8.57890968939094	-10.1883439886688	1.60332314209964e-16	1.23336942142242e-14	27.130895917691
HAO2	-3.25624828050398	7.24542505390408	-10.1879503731821	1.60629093816618e-16	1.23336942142242e-14	27.129067327158
SORL1	-1.80052334127247	8.41322821548421	-10.1779375216295	1.68366583926172e-16	1.28821259425915e-14	27.0825489746648
FOLH1B	-2.30852115423298	6.5091564482098	-10.174756852304	1.70901801080839e-16	1.2984339294047e-14	27.0677710594102
SLC22A1	-4.12185162663019	8.74079053844629	-10.161840793954	1.81596036920695e-16	1.37485978581952e-14	27.0077562174712
GCDH	-1.70442152336612	7.68325328478002	-10.1579994948102	1.84904098478517e-16	1.39502733252799e-14	26.9899060623504
CPED1	-1.79680793099764	6.29015735460431	-10.1571425663287	1.85650270951833e-16	1.39579351281946e-14	26.9859239064615
CCDC3	-1.47920935563108	7.21336628478002	-10.1445071370804	1.97009466134066e-16	1.47124689296923e-14	26.9272031402349
MEIS3P1	-1.21054895869253	5.26420952087462	-10.1444687373952	1.97045027922725e-16	1.47124689296923e-14	26.9270246741903
KIF11	1.88724156454465	3.73507117796274	10.1402316399155	2.01008763379456e-16	1.49568479500184e-14	26.9073319776129
GADD45B	-1.64196706953655	7.48185219328841	-10.1078453433948	2.3406658556859e-16	1.72977603321388e-14	26.7567848354659
NPM1	1.04709168598954	10.0478624235698	10.1007425183291	2.4201612648292e-16	1.78244053970567e-14	26.7237614545131
KIF2C	1.47064776633879	4.71806903170828	10.09364867477	2.50225650301048e-16	1.83665627320969e-14	26.6907777024859
NUP155	1.23651268848549	5.64742881265689	10.0903294940858	2.54162113009709e-16	1.85924737601325e-14	26.6753440119967
PALM2	-2.11369872679966	5.94406908766019	-10.0809569026139	2.65615996641106e-16	1.93649265160601e-14	26.6317603890092
P2RY13	-1.72180456478411	4.35371356520016	-10.0707655669868	2.78658192661185e-16	2.02476035090357e-14	26.5843653812278
RNF125	-1.83878382517315	6.17582109763509	-10.0665073260773	2.84295903106962e-16	2.05881578260035e-14	26.5645610832934
PALM3	-1.57802359124484	6.5031050218655	-10.0614403921668	2.9115338145452e-16	2.0982996950328e-14	26.540994738002
ZFP62	1.2606286378113	6.1188244400185	10.0610516902556	2.91686236643824e-16	2.0982996950328e-14	26.5391868395374
GPC3	3.18008632025494	6.05783562703131	10.0574404531859	2.96683676066774e-16	2.12718266154764e-14	26.5223902568059
ESM1	1.17938849486995	3.83579611903818	10.0381962620358	3.24798029493311e-16	2.31343806994035e-14	26.4328728452793
MAP2K1	-1.2313493652833	7.60705387052451	-10.0346737415383	3.30226056388625e-16	2.34438845868292e-14	26.4164856838482
ZNF260	1.18318542718465	5.58181182071608	10.0325714578382	3.33508780935101e-16	2.35995608940776e-14	26.406705390186
LDHD	-1.87702485811782	5.88235970854802	-10.0288870810455	3.39341009353668e-16	2.39340419398534e-14	26.3895644262527
KMO	-2.82048171881447	6.72633267591492	-10.0213342138715	3.51618327585209e-16	2.47194534000082e-14	26.3544242776578
CTBS	-1.18030428240127	7.25732886246532	-10.0049884018259	3.797340737849e-16	2.64385270085674e-14	26.2783668747419
VSIG4	-1.95857794850611	6.68001292172017	-10.0040840332158	3.81353804415973e-16	2.64661984840354e-14	26.2741585291789
FDPS	1.40993462694335	9.5395172135685	9.96961991485094	4.48521082579427e-16	3.07336297502922e-14	26.1137618967997
MCM5	1.40954336901341	6.38767219976219	9.96612368773122	4.55964807080555e-16	3.11451292356948e-14	26.0974879305684
CYP4F12	-1.26298172318929	7.90544128048619	-9.95651236669088	4.77071980594904e-16	3.24090983535938e-14	26.0527476075391
FAM83D	2.3468605246187	5.71050867155503	9.94594653684926	5.01406558061685e-16	3.36128674975531e-14	26.0035602403362
SPATS2	1.00447098629532	4.73663730690976	9.92999285417794	5.40526845103459e-16	3.61235425216827e-14	25.92928315547
FEN1	1.60525124329501	6.14484504227771	9.92000012451179	5.66572860386706e-16	3.77311575459688e-14	25.8827545144523
ACADL	-2.06249732218906	5.55806149332805	-9.91944088275755	5.68067120490732e-16	3.77311575459688e-14	25.8801504433509
TBCE	1.10396044917846	6.66663590328973	9.90106769657975	6.19417376694814e-16	4.07667004789447e-14	25.7945910143048
AFM	-3.29766952413056	8.74391523926542	-9.89586179788653	6.34794886094805e-16	4.15263252828121e-14	25.7703463447951
FOSB	-2.21980635440613	6.58402049795217	-9.89190074617716	6.46750955085161e-16	4.21810193688524e-14	25.7518985127933
FCGR2B	-2.30599689375184	5.13965045811864	-9.87705697246209	6.93596950953808e-16	4.51004648018102e-14	25.6827619001934
CIDEB	-2.18085572572208	9.2412755173735	-9.86948297773761	7.18794501616636e-16	4.64598726671792e-14	25.6474823643615
MAD2L1	1.15765688537983	3.84956696505483	9.86821812479704	7.23090936188703e-16	4.6598476313375e-14	25.6415905209974
GNE	-1.38054729504678	8.55871980671159	-9.86447754743161	7.35947978335209e-16	4.72862954744578e-14	25.6241661430467
THBS1	-1.69536133983569	5.20366407451447	-9.86001198742899	7.51597103183931e-16	4.8148911465212e-14	25.6033640620139
C1orf85	1.37658434337239	7.0661887246664	9.85449696517514	7.71384722676321e-16	4.9270776991476e-14	25.5776723597408
ADK	-1.37764445326776	7.20877263350509	-9.83969826441252	8.27098675263919e-16	5.26740223984989e-14	25.508727978899
SMC4	1.15825200876805	5.93394221733386	9.83256505458156	8.55375794698977e-16	5.41562926392308e-14	25.4754932687633
DHODH	-1.78019029328765	5.32191993367684	-9.8254913394177	8.84373157533846e-16	5.58289562101468e-14	25.4425342219082
RP11-196G18.24	1.55773830198203	4.41873924441802	9.79921097364044	1.00099732898362e-15	6.22833194381673e-14	25.3200712244308
ADH4	-2.55641873139552	6.73681694041485	-9.79645033382824	1.01410907011394e-15	6.28888796877511e-14	25.3072058369535
CYP4A11	-2.77484115091733	8.48228246875413	-9.79594275398353	1.01653848846409e-15	6.28888796877511e-14	25.3048403427728
GPHN	-1.11162505701076	6.03488631985731	-9.79270374731137	1.03217913196284e-15	6.36745719213427e-14	25.289745299073
NCAPG2	1.25959273209549	4.73981927718325	9.78086802496462	1.0914093905532e-15	6.71371804933195e-14	25.2345836407117
MT1H	-2.9763104435879	10.4121989020346	-9.7798769277898	1.09652101231426e-15	6.72485661963754e-14	25.2299643460907
NCAPD2	1.34598561687666	4.82234117677368	9.7793146564204	1.09943159994074e-15	6.72485661963754e-14	25.2273437057417
SMC2	1.094483875	5.22693526819923	9.77679740736864	1.11255723880438e-15	6.78597236389613e-14	25.2156111763069
MSH2	1.82998771412651	5.32295332031973	9.76143455477626	1.19613485753744e-15	7.25487621015636e-14	25.1440033667049
CENPU	1.3510499865532	4.44027196915048	9.73458996838099	1.35755048527229e-15	8.12017697723784e-14	25.0188627504309
PODXL	1.59113941311155	6.20548460192892	9.72951960363892	1.39040328059495e-15	8.29377472030923e-14	24.9952242582174
FAS	-1.50331668691055	5.14038032157484	-9.72540964675827	1.4176165378874e-15	8.43287112496589e-14	24.9760627889093
TIMD4	-1.6588746421677	3.72380726727441	-9.71833421711337	1.46572034504812e-15	8.69513496748684e-14	24.9430746668093
RRAGD	1.72860326749927	6.66301677711719	9.71747873983822	1.47164615931786e-15	8.70643559773486e-14	24.9390860476927
C1RL	-1.17963820028367	7.06809569203329	-9.69861057434354	1.60862047865416e-15	9.38853348363839e-14	24.8511095779041
TUBG1	1.50762212025678	6.7666805673801	9.69066417636753	1.67006184248538e-15	9.72092717078925e-14	24.8140553677247
CYP3A4	-2.26448412553419	8.28536111877395	-9.68025047767575	1.75415170134753e-15	1.01287058104741e-13	24.7654938160734
IRF8	-1.37632378782604	7.50741646056282	-9.67124417089639	1.83028800866131e-15	1.04844513892972e-13	24.7234932297197
MT1X	-3.02700236844238	11.0028091321178	-9.6665943766913	1.87088194098839e-15	1.06887088834358e-13	24.7018083549987
RND3	-2.26200043666187	8.96445301195667	-9.65893347263532	1.93973910370533e-15	1.10239293471211e-13	24.6660797431315
STARD5	-1.31017114540967	5.82401903884265	-9.65610413484229	1.9658062312815e-15	1.11137342887567e-13	24.6528840617137
RCL1	-1.39104487452107	6.21183434509182	-9.65386542069338	1.98668015726611e-15	1.12024962097092e-13	24.6424428504592
CYP2C9	-2.63908211601091	8.86579030439952	-9.64747608478675	2.04748324361621e-15	1.14558539209358e-13	24.6126428159375
FANCG	1.34575301113506	5.53976968238869	9.62706891852647	2.25444533785086e-15	1.25167961283294e-13	24.5174573785707
EPHA2	-1.71114122397215	5.9117739655833	-9.61364462101837	2.40188299920068e-15	1.33012717600236e-13	24.4548375145157
CXCL2	-1.89985729966107	6.13413277896684	-9.60335728467023	2.52136820193606e-15	1.38919047522956e-13	24.4068480793614
MRPS21	1.04325149316608	9.30526688836042	9.59482664979806	2.62495013929333e-15	1.44258998391164e-13	24.3670519200763
FLAD1	1.01137203717212	6.61475356044392	9.59365027589555	2.63956442404858e-15	1.44356335458779e-13	24.3615639231069
ALDH2	-1.45868111315576	11.1224954274012	-9.58081852803686	2.80436360848283e-15	1.52954370817327e-13	24.3016998072509
MXRA5	-1.86859096535146	5.82544812551196	-9.57976177055958	2.81838616191548e-15	1.53332953678281e-13	24.2967695669048
HADH	-1.09487082357059	8.14332479112168	-9.57836790611399	2.83698932699338e-15	1.53958220294205e-13	24.2902665423827
TTC13	1.12263023806366	6.52893062604043	9.57070429929812	2.94148900641991e-15	1.57653617465372e-13	24.2545116300601
PDE2A	-1.29250916408783	5.85594184079799	-9.56848108016327	2.97251929144646e-15	1.58531921718449e-13	24.2441389008901
FOS	-3.02092590148836	6.92806633993923	-9.55151343214415	3.22039211508465e-15	1.70909682519431e-13	24.1649711963531
ST3GAL6	-1.11474768353043	4.78104778114678	-9.54728361861982	3.28534045037255e-15	1.73930261056031e-13	24.1452349520199
TIPIN	1.38140220895962	4.89437182586867	9.54562365147577	3.31118584713159e-15	1.74445516175037e-13	24.1374894892711
MCM7	1.37634891134321	7.05997728471397	9.5428003157231	3.35561298419754e-15	1.76357009579683e-13	24.1243156043518
CYP3A43	-1.94841509398026	6.82464788743559	-9.53780173269422	3.43573744597268e-15	1.80130806095996e-13	24.1009915402557
VRK1	1.31468241378389	5.86619918747523	9.53717644195153	3.4458943322207e-15	1.80226932308152e-13	24.098073820501
CDC7	1.91335632078912	4.98363357722288	9.50510913908133	4.00914406477031e-15	2.07679417307348e-13	23.9484337840549
BORA	1.05942427710544	4.18286566924296	9.49697395712348	4.16613285010312e-15	2.14783987150674e-13	23.910469029157
GYS2	-3.91291978020925	7.68831828365702	-9.48063283168521	4.50031270887473e-15	2.30912964657025e-13	23.8342064987946
TUFT1	1.8201821206344	6.3235537565068	9.46597568628382	4.82281694858532e-15	2.46299422247605e-13	23.7657999264206
TRIM22	-2.15787282850722	7.32703420808561	-9.46211772808233	4.91148400978842e-15	2.50231442973997e-13	23.7477939410662
CYP4V2	-1.00413507100096	6.12159388419871	-9.46053953506387	4.9482239417794e-15	2.51511485942134e-13	23.7404280953743
PSPH	1.21087888384174	5.18276773933148	9.45131859706414	5.16844992287996e-15	2.61477677990934e-13	23.6973909280346
MFSD2A	-1.92119356646036	5.85220471370062	-9.44638154964451	5.29036712732757e-15	2.67021723561827e-13	23.6743476816359
CD163	-1.77317989124668	6.38387959492667	-9.43695465251133	5.53120943077567e-15	2.7852855303392e-13	23.6303476731986
GOT2	-1.18501814165192	10.1122197603382	-9.4359959433614	5.55630939353207e-15	2.79143311596636e-13	23.625872846209
KCNN2	-3.0955549966383	4.94065334535606	-9.43281015904735	5.64053796158289e-15	2.82718908523505e-13	23.6110029530131
GABARAPL1	-1.31857515498821	6.98896700673801	-9.43202238351021	5.66156215743004e-15	2.83117333475364e-13	23.6073259331964
DBF4	1.19405531771294	5.04515998784516	9.42537329474947	5.84216661269217e-15	2.90805594631318e-13	23.5762903943707
PBLD	-2.26099285009578	8.51509728960233	-9.41897345719617	6.02144378970716e-15	2.99042023803966e-13	23.5464178360221
BCKDHB	-1.29625876886236	6.3253303034747	-9.41091140513374	6.2551404503501e-15	3.09937199476958e-13	23.5087859653552
MCC	-1.61794808580165	6.11450273338618	-9.40678448396577	6.37825868366081e-15	3.15316062276958e-13	23.4895221690101
WFDC1	-1.30297827210433	5.2699241765755	-9.40524069002077	6.42493527006331e-15	3.16227245047045e-13	23.4823159487657
ITGB3BP	1.52769113015768	6.34873502642357	9.40520893864629	6.42589885099986e-15	3.16227245047045e-13	23.4821677374326
PHYHD1	-1.6926102355585	6.7223278785837	-9.3979054625227	6.65142895234167e-15	3.25844776255779e-13	23.4480758038314
SLC16A2	-1.6951252313771	7.13158006420927	-9.39539229715152	6.73085284597428e-15	3.28991324320273e-13	23.4363444750844
CFI	-2.1447617444555	9.2123785648038	-9.39245678621512	6.82482656034396e-15	3.32085324744107e-13	23.422641588305
AGXT2	-2.20683949790009	7.52915190183644	-9.38341309109995	7.12267254982053e-15	3.45027357318264e-13	23.3804253983488
NABP2	1.22337482583628	5.6222448608799	9.38263405472834	7.1489299244977e-15	3.455262938731e-13	23.3767888057291
TLCD1	1.0613569560308	5.49316758316819	9.36677357926552	7.70507420560924e-15	3.70751048386793e-13	23.3027500354372
METTL18	1.12537625285515	5.6576292053772	9.36326302377758	7.83390805274949e-15	3.75585655071872e-13	23.2863620493924
SLC26A2	1.30999454349028	5.35216168476681	9.36309197976237	7.84023997101954e-15	3.75585655071872e-13	23.2855635789406
H2AFZ	1.29787575692603	9.12527048156956	9.36176404038538	7.88957378644446e-15	3.76284011449079e-13	23.2793644637404
CENPL	1.30934739190981	4.27013880994847	9.35931932283288	7.98121029897614e-15	3.79213576067696e-13	23.2679519484212
CRISPLD2	-1.13663349725538	5.43927483617387	-9.35919166250017	7.98602460106542e-15	3.79213576067696e-13	23.2673559988912
ANXA10	-2.68687213747053	7.43245523523583	-9.35362106733726	8.19895582949691e-15	3.88472627081174e-13	23.2413509963773
AACS	1.38044391881263	6.28534512894702	9.33464084372131	8.9680287910443e-15	4.2122500523315e-13	23.1527448509821
FBP1	-2.22478929700854	9.21604961302682	-9.32834919009996	9.23857211152869e-15	4.32993077772577e-13	23.1233728117896
EPHX2	-2.01415088840996	7.9305516669309	-9.31510291799682	9.83515591236174e-15	4.56018481735265e-13	23.0615330839105
NEU1	1.1940945668656	7.4759966572863	9.3091933289981	1.01135993443719e-14	4.67926851717277e-13	23.0339441272308
SNRPB	1.13788192869511	8.69768166534549	9.30735041508386	1.02020351222097e-14	4.71012082092126e-13	23.0253404408553
PRR11	1.13897622912982	8.47386173325406	9.29463915144751	1.08334455664127e-14	4.96984315359183e-13	22.965997255663
CCR1	-1.38805959141984	6.00105634773418	-9.27785087812543	1.17276797182576e-14	5.36869870907889e-13	22.8876195312763
COA6	1.01325386727269	7.41468461996301	9.26907329869307	1.22242419431011e-14	5.54908827660309e-13	22.846640239895
RRP15	1.08174537586575	5.21771697159466	9.25221047266571	1.32379798873968e-14	5.98417491653032e-13	22.7679135180649
PRKAA2	1.16035451886236	4.37141257391994	9.23781012101173	1.41699881205829e-14	6.37885140904328e-13	22.7006830047725
CCNE2	1.63010472098806	4.08828323067776	9.23557059754029	1.43207169059407e-14	6.43332952623098e-13	22.6902273971849
ACTL6A	1.06208019444445	6.43392193678161	9.21756854065826	1.5592060908464e-14	6.96113185259736e-13	22.6061816822785
ITLN1	-1.01840965820255	3.94230402721628	-9.21467423487599	1.58067455243119e-14	7.04245804193265e-13	22.5926691352114
ID1	-2.44897997016836	7.09733659043467	-9.20847563781244	1.627652361807e-14	7.23686993638745e-13	22.5637299885584
KLRB1	-1.40455157890326	5.83421820550931	-9.20140022236204	1.68298444795309e-14	7.46755374006726e-13	22.5306973433711
GAS2L3	1.48638192554524	5.60109873404677	9.1911325244426	1.766644251998e-14	7.82272965000259e-13	22.4827612159641
MT1E	-2.86370328345122	10.9990061203594	-9.1878009883911	1.79467305683737e-14	7.93062361218357e-13	22.4672075444601
RFXANK	1.04952496531462	6.54638463073061	9.1842620190052	1.8249343386115e-14	8.04792326557125e-13	22.4506854777781
MAGI2-AS3	-1.01553530349249	4.03463202206368	-9.16759553604378	1.97445261880901e-14	8.63693384950941e-13	22.3728766923008
FNBP1L	1.07886978601165	6.96361819434536	9.16264980352307	2.02113514602334e-14	8.82331437839586e-13	22.3497873413456
MT1HL1	-2.53243500652999	11.4553392374818	-9.16022285214133	2.04444513704817e-14	8.90711681136901e-13	22.3384570572293
RP11-138A9.1	-1.84716512606838	8.29857915708812	-9.15749033262843	2.07101191064724e-14	9.00474315286038e-13	22.3257002501906
HGF	-1.08676613920203	4.22771913304267	-9.15684951814609	2.07729200553209e-14	9.0139486564702e-13	22.3227086031378
RCN2	1.19355025246832	7.22331539688202	9.15567057624374	2.08889563450771e-14	9.04617143479908e-13	22.3172047090513
CKS1B	1.29754568823681	8.2764562602061	9.15398841180602	2.10556450098505e-14	9.10015731333916e-13	22.3093515296906
CYP2A7	-2.46918408486221	8.36727659479456	-9.15065216675104	2.13901849542048e-14	9.20798558277131e-13	22.2937763186237
KNTC1	1.6358968501971	4.67599218053904	9.1460874630421	2.18565362002249e-14	9.36902607355936e-13	22.2724661524542
MSTO1	1.26178076637563	6.00123316818602	9.14572413466027	2.18940894713021e-14	9.36902607355936e-13	22.2707699705053
CLRN3	-3.23525741137084	6.64786624032237	-9.1410693713512	2.238094866751e-14	9.55847498022868e-13	22.2490394804479
SHBG	-1.5883764886439	6.00916775604439	-9.13918868410148	2.25807141518996e-14	9.61556445890374e-13	22.2402596343632
TROAP	1.00506966091954	5.40167690487515	9.13897581100495	2.26034374432273e-14	9.61556445890374e-13	22.2392658536221
ZNF623	1.24666013304966	4.49606283762716	9.13247097984781	2.33089356122627e-14	9.87687637597502e-13	22.2088986994626
IGFBP3	-2.20476913597848	8.98244770894438	-9.13148677324847	2.34175814512198e-14	9.90353303053248e-13	22.2043040502978
SCAMP3	1.10490410225096	8.07012447787026	9.12808342588918	2.37971925725609e-14	1.00054487528866e-12	22.1884159799145
COL15A1	2.58618828227232	4.77355333036068	9.09935631293778	2.72567253664853e-14	1.13936269181565e-12	22.0543103287331
CDK4	1.05154013279178	8.02078867155503	9.09643737991693	2.76352428434976e-14	1.15228710847212e-12	22.0406843222112
C6	-3.18468289931476	9.5847159400185	-9.0961534177875	2.7672345467395e-14	1.15228710847212e-12	22.0393587490014
NDRG2	-1.05864748712423	5.75658367789668	-9.08690678061172	2.89081212786832e-14	1.20143483694305e-12	21.9961945660155
ABHD6	-1.00346607276009	5.81205738367023	-9.0853736073353	2.91182919517811e-14	1.20785129431402e-12	21.989037635769
STEAP4	-1.51657898113764	4.6529803478663	-9.08118683195374	2.97000393447728e-14	1.2296270591441e-12	21.9694936598934
FERMT2	-1.12775744532862	7.787227923768	-9.07833622684853	3.01027630933977e-14	1.24155262716446e-12	21.9561870493815
EFNA4	1.05321411715297	5.54950790342185	9.07701413793332	3.02913922100308e-14	1.24695725384752e-12	21.9500155695039
CDKN2C	1.36937886870027	6.04238573127229	9.07478370444752	3.06123019464215e-14	1.2577764213394e-12	21.9396039944663
CA5A	-1.57533289392683	6.33446974184172	-9.04323875340969	3.55323495397545e-14	1.44620670034643e-12	21.7923586060795
SSR2	1.38117157099175	9.78966769758224	9.04194660648851	3.57499363522212e-14	1.45233278017757e-12	21.7863273496142
POLE2	1.5777290963841	5.61795680796671	9.0358293084184	3.67982579966704e-14	1.49212112434813e-12	21.7577743540664
KLKB1	-2.00607879512967	9.35323750442595	-9.02037224247537	3.95861202944338e-14	1.59917586331227e-12	21.6856291630081
ANKRD27	1.15813011719901	6.28849561329106	9.01580638782968	4.04493261482753e-14	1.63100420686891e-12	21.6643187896335
RDH16	-2.78405216081823	8.7756671706302	-8.99233629938363	4.51925509645792e-14	1.80878799636975e-12	21.5547803185125
HRSP12	-1.44480798310861	8.24499581833796	-8.98459736226142	4.68754094213679e-14	1.86923248655779e-12	21.5186631856447
PEA15	1.109792572668	7.98536634218523	8.98363346158474	4.70893530089896e-14	1.87431206011701e-12	21.5141647822914
MT2A	-2.44435927155172	11.8402842333201	-8.97891691515101	4.81503758386857e-14	1.913027684468e-12	21.492153449492
CFHR4	-3.43977135203912	9.38484613350509	-8.97220201393079	4.97023040940477e-14	1.971069579759e-12	21.4608167028895
ALDH1B1	-1.25558251121795	6.15268589272031	-8.96971769479931	5.02890589282806e-14	1.9906928573566e-12	21.4492231874618
HSPB1	1.35823419718907	9.82656880935394	8.96652036251438	5.10544169186335e-14	2.01730162324666e-12	21.4343024103854
C21orf91	-1.00636892867669	5.61159228986656	-8.9656951794177	5.12538273785584e-14	2.01781658950532e-12	21.4304516094331
PRMT3	1.08980148951886	5.34241902265821	8.94919337039361	5.54091521344084e-14	2.15786757404019e-12	21.3534465282687
DEPDC1B	1.71557689983974	3.71672526819923	8.93597905456971	5.89781525859209e-14	2.28453298379775e-12	21.2917856812044
SESTD1	1.16884596590407	5.97672961897212	8.93050113547765	6.05242015348998e-14	2.34023309970569e-12	21.2662254186982
PROZ	-1.85366047254458	6.80922244662439	-8.92065932171167	6.34043534381145e-14	2.44287271351511e-12	21.2203043444583
IL13RA2	-2.66208469045646	4.71480750647377	-8.90872073940085	6.7082588275375e-14	2.56632382319204e-12	21.1646023318737
PZP	-1.705859128638	5.88904218086934	-8.89910375038902	7.02000559763959e-14	2.67142673472215e-12	21.119734196198
PGLYRP2	-2.63531911749373	8.33668028147708	-8.89831208915392	7.04630431233808e-14	2.67673030307116e-12	21.1160407755148
SLC27A5	-1.46583659560124	7.51906715827718	-8.89329334785564	7.21533113072765e-14	2.73135603100779e-12	21.092626603041
FAM134B	-1.38512318733422	4.69386183828775	-8.8917440749343	7.26832331033738e-14	2.74661439160097e-12	21.0853988086479
MS4A7	-1.69225660342986	6.61951000541683	-8.89075487843055	7.30236160189458e-14	2.75466961264501e-12	21.0807839538684
CYP2A6	-3.3517168805445	8.61544837389351	-8.88059980713893	7.66114456511714e-14	2.87001320533705e-12	21.0334091091167
FGL2	-1.43605225981801	6.74748086814639	-8.87897682703477	7.72009585434325e-14	2.88710251354222e-12	21.0258378758919
TUBA1B	1.05903216231948	9.68575355463073	8.86030963038136	8.43162645721849e-14	3.13694171268302e-12	20.9387591029608
HAAO	-1.41436903874705	7.67880139536266	-8.85597295992318	8.60609337109866e-14	3.19635917263121e-12	20.9185304888354
AKR7A3	-1.93284248415856	8.27070011454617	-8.84163496305332	9.2090100790489e-14	3.41442971304188e-12	20.8516532339229
AKR1D1	-3.38022125992853	8.64750413304267	-8.83827944319177	9.35609935519554e-14	3.46303622800084e-12	20.8360026453576
DEPDC7	-2.28552270878462	7.74820927738142	-8.83215979024313	9.63042558354665e-14	3.55849155564054e-12	20.8074604610743
RP5-1136G13.2	1.12947141429045	5.9186166550403	8.82687676221992	9.87370371189181e-14	3.64216876445644e-12	20.7828210350575
TIGD1	1.50331977247274	4.98827391617122	8.82378063316285	1.00191213347474e-13	3.68952439219873e-12	20.7683813658075
IL33	-1.70148743684608	4.75788504221165	-8.81915119064692	1.02405566013224e-13	3.76466506092419e-12	20.7467910972551
LY6E	-2.07837308370174	7.79469487468622	-8.81803864509134	1.02944965685487e-13	3.77808024065737e-12	20.741602612681
GBP1	-1.47579230071102	7.54317969969613	-8.81459490750668	1.04632665569017e-13	3.83351136733399e-12	20.7255425409287
C8A	-2.61525265708812	9.25201449953759	-8.81189616951048	1.05974556001508e-13	3.86307586043881e-12	20.7129570265389
FOXO1	-1.09815963627321	5.74900148302286	-8.8080028575432	1.07940776218278e-13	3.9231957362038e-12	20.694800963739
SLC28A1	-1.62972210400088	6.0752465432686	-8.8079138016591	1.07986175531218e-13	3.9231957362038e-12	20.6943856652345
EGR1	-2.13499484921161	8.51861486775003	-8.80427627805172	1.09856924462198e-13	3.98447568740363e-12	20.6774228035876
BBOX1	-2.74853808178603	6.47891230103052	-8.80219497157472	1.10941851971889e-13	4.01709685743696e-12	20.6677172016516
C8orf4	-2.29105446310419	6.99309291808693	-8.78387287923622	1.20966613445649e-13	4.35098020089476e-12	20.5822820600121
APOL1	-1.29550268091475	7.37544760899723	-8.7816026430034	1.22270171068901e-13	4.38330465919689e-12	20.5716966699663
HOGA1	-2.05657767215591	7.22332756520016	-8.77229074590723	1.27765494498322e-13	4.55017475719105e-12	20.5282797308672
MAT1A	-1.7144383335728	10.9203097469943	-8.77096889188075	1.28565320899052e-13	4.5711410401103e-12	20.5221167499273
COLEC11	-1.93953790887489	8.41588520220637	-8.755104636168	1.38563797840164e-13	4.91051049858114e-12	20.4481554705669
CDC6	1.83097758797524	3.90471392799577	8.74390281750317	1.46088164127631e-13	5.16870427754183e-12	20.3959354712197
STXBP6	1.00604146621721	4.05794737481834	8.73615740187891	1.51528199348857e-13	5.33502455365985e-12	20.3598305077967
ADH1B	-2.78558251729664	8.05500456163298	-8.73353956060997	1.53412240122075e-13	5.39258966779754e-12	20.3476279473836
NUDT6	-1.21276579261531	5.87085836788215	-8.72257222197034	1.61563102449388e-13	5.6424610602203e-12	20.2965080970617
HLTF	1.0673137996887	7.60566506572863	8.70610592866833	1.74620166428898e-13	6.02078099312888e-12	20.219764124366
ECM2	-1.32786183965149	6.40820496763113	-8.68530547698696	1.92631104920934e-13	6.59974891590664e-12	20.1228325729529
DHRS1	-1.71199543320807	8.62391089774079	-8.67766906571109	1.9969930535083e-13	6.83110435823304e-12	20.0872499764308
GOLPH3L	1.27711065653551	7.32883895521205	8.67726037433663	2.00084806363189e-13	6.83349576053963e-12	20.0853456951894
SHCBP1	1.35886240412246	3.95095057913859	8.67627134445437	2.01020794345135e-13	6.85099843725312e-12	20.0807373732672
CBX1	1.16702655087681	6.97602186272955	8.67605082387896	2.0123008387258e-13	6.85099843725312e-12	20.0797098762035
ZFPM2	-1.30115865977748	4.22974026654776	-8.65889574669493	2.18196540386127e-13	7.39375538181661e-12	19.9997823855484
HMGCL	-1.11427621986442	9.09789775373233	-8.65761676581367	2.19517254870878e-13	7.42688612456114e-12	19.9938238776158
IGHM	-1.05921271649351	5.27841482956797	-8.65654302901218	2.20632191004188e-13	7.44135332058207e-12	19.9888216041868
LAMC1	1.39255525427351	8.00184222988506	8.64855129435485	2.29110212594825e-13	7.69135416017946e-12	19.9515913850051
GPR125	-1.13587464992263	5.84905266706302	-8.64697132120136	2.30824455315197e-13	7.73690701383896e-12	19.9442312082173
DDX39A	1.28624761967654	7.97483320042278	8.63014347432024	2.4989650419862e-13	8.28638438807462e-12	19.8658456936643
RGN	-1.55385098257442	9.02540834707359	-8.62891922071483	2.51343927165934e-13	8.30893138156332e-12	19.8601434258754
TFPI2	-1.39341938323386	3.6754284914784	-8.62587147800401	2.54983712169105e-13	8.4164059749964e-12	19.8459480441084
GPR146	-1.27435538901783	5.68925783075704	-8.62277161763755	2.58739737547999e-13	8.52738437918846e-12	19.8315102730581
NAAA	-1.01124452495948	5.6505661206236	-8.610987701695	2.73529212738239e-13	8.9332248015401e-12	19.7766293595665
LBR	1.07429044510758	9.70395593935791	8.60556075703061	2.80621375967798e-13	9.13728519373041e-12	19.7513563896878
RP11-96D1.11	-1.33155378992595	6.01396666983749	-8.59810706347709	2.90662429335787e-13	9.42172691977213e-12	19.7166468362987
SLCO1B3	-4.03799262889589	7.42266264123398	-8.5869201115844	3.06409909254213e-13	9.90252800758429e-12	19.6645567676317
OSBPL3	1.13210079859269	4.41631194517109	8.57984495557736	3.16806240589628e-13	1.01777530081413e-11	19.6316151407467
SERPING1	-1.32512698957411	11.6581993473378	-8.57263299399679	3.27766154518591e-13	1.04986990292767e-11	19.5980386477335
MDK	2.31421634256189	6.28806959763509	8.56779558682308	3.35328819147811e-13	1.07250737385636e-11	19.5755184875567
SLC38A2	-1.50309298281388	10.7000582933016	-8.54868256119055	3.66952646105407e-13	1.17019523506928e-11	19.4865489034227
HBB	-1.74649349417919	7.93084329911481	-8.54370800752609	3.75660797444345e-13	1.19444687915748e-11	19.4633953044459
LINC00844	-3.60162123560455	7.15674325300568	-8.53690931874204	3.87896798013622e-13	1.22615027261153e-11	19.4317531660459
KIAA0922	-1.26696997440502	7.24378513112697	-8.52551093376333	4.09310393212178e-13	1.28632771323996e-11	19.3787078718388
CD1D	-1.87967210259173	5.60219408633901	-8.52470268823896	4.10872867059806e-13	1.28936669426753e-11	19.3749467128209
FNDC4	-1.0988812681716	7.34632209902233	-8.52236874336642	4.15418277126074e-13	1.29986299922122e-11	19.3640858968243
HCLS1	-1.48466860641394	7.02985969018364	-8.50934584342456	4.41717849887925e-13	1.37027458504631e-11	19.3034894154942
ERLIN1	-1.25705859521441	6.9445870184965	-8.49274347098533	4.77669872301131e-13	1.46917411149665e-11	19.2262486124678
APOA1BP	1.031401808687	8.99807902206368	8.48868108852719	4.86902851274509e-13	1.48911122014787e-11	19.207350750375
TARBP1	1.19625640588159	7.36073608541419	8.47936743304603	5.08748910965748e-13	1.55154086889315e-11	19.1640273414189
GHR	-2.67863115706049	8.92807198791122	-8.47467537478572	5.20122471648534e-13	1.58177133126485e-11	19.1422033203999
SMYD3	1.68883452286877	6.83804336893909	8.46971667992917	5.32418318310957e-13	1.6146293902503e-11	19.1191402490615
EPB41L4B	-1.0160538630084	5.59562697331219	-8.45209096034061	5.78520021069519e-13	1.74709818915178e-11	19.037172058972
BLM	1.07823373192971	5.15217556724799	8.44755354837943	5.91019565107398e-13	1.7798813133895e-11	19.016073357924
ZBTB41	1.15889339707671	6.66987494233056	8.44366408815716	6.01948487611833e-13	1.80548265987464e-11	18.9979884120852
PRODH2	-1.34140478980622	7.02883927718325	-8.44363812571007	6.02022112607718e-13	1.80548265987464e-11	18.9978676962217
PAFAH1B3	1.35881947543656	6.46227737415775	8.44230431905788	6.05816673817917e-13	1.81434971482425e-11	18.9916660296657
C8orf76	1.09945819761273	5.23016591907782	8.43949159692657	6.13897047939972e-13	1.83601005235417e-11	18.9785882919853
ANG	-2.18049553236443	10.6391410755714	-8.43454256464941	6.28376623271957e-13	1.87413760657131e-11	18.9555787611102
B3GNT5	1.07882954085618	4.25821872929053	8.43408772863523	6.29724336527924e-13	1.87557373574129e-11	18.9534641548037
UROC1	-1.02737097008547	4.80574824137931	-8.42481733385357	6.57830599590113e-13	1.95391028435181e-11	18.910366889675
CD14	-2.10859013796787	9.58978264565993	-8.4226610382766	6.64545583225362e-13	1.97115144021627e-11	18.9003430902475
NTN4	-1.70787424331344	5.23750212894702	-8.41640587517779	6.84414529489618e-13	2.01627589211411e-11	18.8712665739107
ACADS	-1.19836451978338	7.21107719229753	-8.40113958349314	7.35431245297508e-13	2.15484340384668e-11	18.8003113017519
GNPAT	1.10326468475538	8.69169875769586	8.39240495958145	7.66309533569716e-13	2.23925780437045e-11	18.7597197344482
EDNRB	-1.63344491432729	6.41700357246664	-8.39130433616091	7.70291095552866e-13	2.24785890727846e-11	18.7546052048464
PLSCR4	-1.51089467244142	7.83003035903026	-8.38895143190801	7.78872225013409e-13	2.26984122317838e-11	18.7436716221748
ABCA8	-1.36428906664456	4.75080406579469	-8.36266285125372	8.81484932003987e-13	2.54151707492441e-11	18.621533232798
GPT	-1.0099014535809	6.8896433412604	-8.34975324104146	9.36707991470557e-13	2.6864288926241e-11	18.5615684658965
PCNA	1.25519154293767	8.38222638089576	8.34847839497302	9.42345211624486e-13	2.69623875749076e-11	18.5556473550715
ALAS1	-1.64209026703875	9.82533844034879	-8.34841669107334	9.42618916279732e-13	2.69623875749076e-11	18.5553607693887
IGJ	-2.93740485918619	5.66407119513806	-8.34807615872042	9.44130868895585e-13	2.69700075253247e-11	18.5537791601828
GBAP1	1.47190544692197	7.34407340322368	8.34319435613061	9.66073812495326e-13	2.75242056078438e-11	18.531106261076
DEPDC1	1.3629140813992	3.87869035407584	8.31501373668594	1.10306173563941e-12	3.12625598976442e-11	18.4002520500209
PKN1	1.05039603993516	6.08299671581451	8.29987815530116	1.18446842694752e-12	3.3351488749928e-11	18.3299907203698
ALDH6A1	-1.76380675289198	8.25308563707227	-8.29883452809168	1.1902975667956e-12	3.34720950828898e-11	18.3251465765854
CYP2C18	-2.16693959234085	7.92368169824283	-8.28426087012872	1.27475265285279e-12	3.57079161607006e-11	18.2575078218094
OTUD6B	1.02459263875995	5.64926006830493	8.27186338033042	1.35128541811674e-12	3.76084616432929e-11	18.1999793449044
COLCA2	1.99311330893568	4.29233490210067	8.26501328363534	1.39552135131362e-12	3.87342929181814e-11	18.1681967429475
MCAM	1.16910317067308	5.94564336398467	8.26477230796598	1.39710353157067e-12	3.87342929181814e-11	18.167078734689
RUSC1	1.15732520484269	6.77051301030519	8.25040552447894	1.49473779830881e-12	4.13353225373956e-11	18.1004306189386
NME1	1.15590140336723	8.86966839054036	8.24362939203278	1.54312073538622e-12	4.25379406103587e-11	18.0690004486381
CEBPD	-1.46630002658046	7.85276199682917	-8.24314810615705	1.54661604204189e-12	4.25525758047433e-11	18.0667681824142
SPIN4	1.261142576306	4.70667896591359	8.22963314196365	1.64805857453125e-12	4.50005199424026e-11	18.0040901950959
FTCD	-1.67028973992411	8.13846878451579	-8.22360384372994	1.69542939925173e-12	4.61775255119469e-11	17.9761321517326
KIF18A	1.05800977686598	3.39216506183115	8.21975581926714	1.72636994138695e-12	4.69611662573512e-11	17.9582900026237
TUBA1C	1.15334083526747	11.045136469679	8.2164046454391	1.75377390939546e-12	4.76467584192471e-11	17.9427524064714
ILF2	1.39983797511421	7.97481862729555	8.21266276371713	1.78488584481291e-12	4.82498541794432e-11	17.92540419527
GSTA4	1.45975328768789	6.71372041366099	8.19061779089856	1.97968010915149e-12	5.31836394583836e-11	17.8232179368905
KCND3	-1.02815511039272	4.59198293526225	-8.18521770527506	2.03054413162533e-12	5.43478023264318e-11	17.7981916990076
SLC16A4	-1.49098400245911	4.50385035083895	-8.18137701518729	2.06751114748677e-12	5.52007631029975e-11	17.7803935759534
YY1AP1	1.02617602610154	8.11585620788744	8.17235539034924	2.15700642406858e-12	5.72227419668591e-11	17.7385905531856
ETS2	-1.22059869326555	6.88492426000793	-8.17106809665793	2.17008760456923e-12	5.73735127005344e-11	17.7326261538868
NR1I2	-1.68279684510389	6.88955137812128	-8.16857307941724	2.1956670739002e-12	5.78379308408286e-11	17.721066358665
GZMK	-1.40555174487916	5.47650613898798	-8.16574225823542	2.22505356093288e-12	5.84697630520385e-11	17.7079512645731
SLC25A20	-1.15333551175213	8.35454255555556	-8.1608396992978	2.27687733884455e-12	5.94707177539216e-11	17.6852392257379
BRI3BP	1.36871842994769	7.09009378451579	8.15596303287179	2.32962142001257e-12	6.04835642776166e-11	17.6626488356614
CTSO	-1.65189051031536	7.78905244906857	-8.14904110418211	2.40658483167513e-12	6.20354540003115e-11	17.6305870131555
CEP55	1.53477430560161	3.87220897615273	8.14542652569126	2.44777691343383e-12	6.29474032144687e-11	17.613845944201
PLG	-2.17149499845269	9.44794641788876	-8.14272682845184	2.4790008928633e-12	6.36747406087414e-11	17.6013428018648
CCL4	-1.67321918762894	6.8729650395693	-8.10936345655479	2.89927887754631e-12	7.31782285635244e-11	17.4468707214307
DNALI1	-1.11897737525788	5.08781761170564	-8.10391942652686	2.97430166004235e-12	7.49738694352702e-11	17.4216727793498
PCOLCE	-1.70231467937666	7.55979259908839	-8.10299975730679	2.98716512868089e-12	7.52105657341015e-11	17.4174162691297
DUSP1	-1.02344628675766	7.29321812531378	-8.09390636138856	3.11737886224387e-12	7.81256996576001e-11	17.3753327079988
TENM1	-1.2173027720767	4.42519798104109	-8.09202195692709	3.14506259016229e-12	7.87283702483052e-11	17.3666126120862
FABP5	2.12209947222222	6.97934573180077	8.09016195236395	3.17262820308628e-12	7.93266957060361e-11	17.3580056933644
HPX	-1.97579675158413	11.8679045988902	-8.08530147375957	3.24580381678262e-12	8.08761680607526e-11	17.3355157416581
RPS21	1.04537291403257	9.39851751195667	8.07019421904712	3.48416284532007e-12	8.66160483234392e-11	17.2656245290242
SERPINA4	-1.94332910164309	8.52836128550667	-8.06388225583837	3.58884781436212e-12	8.87092713748665e-11	17.2364285500073
ZBED8	1.17694255921198	3.6202428145726	8.05468242408362	3.74706903229095e-12	9.2409209289517e-11	17.193880362429
LOC101928635	-1.24861558009137	5.88236510199498	-8.04975196736743	3.83470676418863e-12	9.4355574505655e-11	17.1710803190371
KIF23	1.28196872006705	3.59996730915577	8.04412401621745	3.93724202998319e-12	9.6549379020641e-11	17.1450572069807
SERPINA10	-1.2000556718796	9.76676736464526	-8.03145628866479	4.17814310415797e-12	1.02151489602307e-10	17.0864921660748
CTH	-2.3184642154804	7.91532982983221	-8.02925757752157	4.22142746770431e-12	1.03051374248254e-10	17.0763284783086
C1orf168	-1.33721910538241	6.60136730083234	-8.00546224851289	4.71944524603127e-12	1.13797492107255e-10	16.9663583811923
FAM213B	1.1118830849359	6.31886232183908	8.00423467857613	4.7466694740358e-12	1.14200339483471e-10	16.9606864394457
KYNU	-1.13545432473106	6.27579776218787	-8.00124802623309	4.81356088910936e-12	1.15552144048653e-10	16.9468872480231
RAB11FIP4	1.09760687702623	4.68942341049016	7.99559242940794	4.94281263604713e-12	1.18261571279921e-10	16.9207588154034
F9	-3.68649681410256	10.0809756590038	-7.98860241840291	5.10734969951633e-12	1.21137352088461e-10	16.8884692130704
RNASE4	-1.39406616930076	9.24640460774211	-7.98699824370596	5.1458737584972e-12	1.21774431139606e-10	16.8810594843968
SERPINI1	1.93437795195992	4.85755044299115	7.98639814595759	5.16035934391402e-12	1.21983909250841e-10	16.878287671924
CYR61	-1.78660572778514	7.10743449530982	-7.97611444002394	5.41500581438933e-12	1.27446870542361e-10	16.8307926721991
PANK1	-1.5292476078323	8.46780696835778	-7.97121847300519	5.54060290621974e-12	1.30261318923318e-10	16.8081839721295
PEG10	2.82975559700118	5.52366329224468	7.94961742232498	6.1303147311267e-12	1.43038475078757e-10	16.7084589795497
RPL39L	1.41850235222333	4.77208638796406	7.94271107087283	6.33174689082449e-12	1.47262422585416e-10	16.6765832305033
SLC17A3	-1.78187223071397	6.29461730433347	-7.91432401277032	7.23132724300634e-12	1.65868568636458e-10	16.5456095225574
LRP11	1.15965741559829	6.99991670114943	7.91348277147964	7.25984499336173e-12	1.66346480043663e-10	16.5417292667364
SEC24B	-1.12345558197023	8.39077075657286	-7.91317899375978	7.2701704527361e-12	1.66406977603694e-10	16.5403280968483
SLC17A2	-2.24460921629089	7.82304494992734	-7.90248216778433	7.64323809288446e-12	1.73338047071774e-10	16.4909945256371
MICB	1.24064988482722	5.39329777229489	7.89844280894457	7.78902554811293e-12	1.76233824653385e-10	16.4723678022706
WDYHV1	1.17534871270815	6.01977756975822	7.89411399695193	7.94833634226841e-12	1.79650654299726e-10	16.4524079911326
DNMT1	1.24958899194113	7.29673971158673	7.89386993435812	7.95741449329662e-12	1.79668296166164e-10	16.4512826893081
C8B	-1.8625073846338	9.951191228696	-7.89338339532131	7.9755426301557e-12	1.79890025594543e-10	16.4490394153909
GRHPR	-1.21008092758988	9.9632100688334	-7.88864038580614	8.15443397189197e-12	1.83161782980681e-10	16.4271720844606
RP5-1074L1.4	1.36123978038425	5.42547481193024	7.87498871011547	8.69195360426024e-12	1.94027702467059e-10	16.3642436449365
ADH1A	-2.90659208007294	10.2203627736821	-7.87102981676931	8.85433181882536e-12	1.97448863926906e-10	16.3459980960003
TAT	-1.80827520256778	7.16197554075836	-7.86586590953496	9.07068469169462e-12	2.0113240472427e-10	16.3222011651613
UGP2	-1.28568458694371	8.88171278993262	-7.86003939164054	9.32112814288346e-12	2.05529926352195e-10	16.2953537517971
DCXR	-1.82556111965811	11.103590816092	-7.84742144344813	9.88734954989975e-12	2.16910617835845e-10	16.2372239246657
FMO2	-1.26638451287577	5.42746508072401	-7.83339468111308	1.05570826179278e-11	2.30435997909265e-10	16.1726218370762
MCM10	1.02557766672193	3.63656925644075	7.82939589844341	1.07561577866406e-11	2.3454489884605e-10	16.1542084286655
MOGAT1	-1.70267668380673	5.81317190890474	-7.82789286496339	1.08319477431788e-11	2.35959924027214e-10	16.1472877347372
CISH	-1.35990636656352	7.15016182428326	-7.82356399297999	1.10532146105934e-11	2.40537945691636e-10	16.1273567510902
SLC41A2	-1.51877528210654	6.72887072057075	-7.8220922405949	1.11294629100479e-11	2.41740467618055e-10	16.1205809316099
MGMT	-1.11614396343575	7.98401277599419	-7.82206649160618	1.11308015616866e-11	2.41740467618055e-10	16.1204623874136
HPD	-3.88228668878942	9.91537018113357	-7.82164203743441	1.11528914275739e-11	2.41940472279498e-10	16.1185082781998
PRKAR2B	-1.18825405725943	4.16224886127626	-7.82146039989077	1.11623577244363e-11	2.41940472279498e-10	16.1176720576665
LSM2	1.04435124833297	6.17195877553177	7.81808052883604	1.13399715969919e-11	2.45054296396872e-10	16.1021124459191
SULT1C2	1.96816419368922	5.02139372902629	7.813078380025	1.16080152622557e-11	2.49601146448483e-10	16.0790865729044
LEPREL4	1.28125003899573	5.01100175287356	7.80824572666775	1.18729673177493e-11	2.53535859301011e-10	16.0568432812484
DSN1	1.17724148285993	6.0170275947285	7.79627541377495	1.25554672759616e-11	2.66794438593127e-10	16.0017574795217
SLCO2B1	-1.31797266609563	6.92796125142027	-7.79526770812584	1.26146751248231e-11	2.67789765174309e-10	15.9971208078531
OGDHL	-1.96342044747458	7.66414991934205	-7.78973667151228	1.29446379686982e-11	2.73988510201586e-10	15.9716731379945
C1orf112	1.15851796491858	3.98114786953362	7.77628487176176	1.37834396803016e-11	2.90606445372512e-10	15.9097959040179
TDO2	-1.75438991149057	7.07295305443255	-7.77226299052696	1.40445829623787e-11	2.95249859111054e-10	15.8912991540817
CCL2	-2.03253649406867	6.60193308594266	-7.76122744742259	1.47867091262956e-11	3.08752760570568e-10	15.8405549264595
XDH	-1.85366873005084	7.48227900422777	-7.76074538964894	1.48200023347981e-11	3.09085176138983e-10	15.8383385897143
FETUB	-2.91118884478153	6.8740485847536	-7.75475588907122	1.5239944312846e-11	3.15508773064436e-10	15.8108029298532
NAA40	1.09954266211686	5.5355053538116	7.75473532169035	1.5241406577629e-11	3.15508773064436e-10	15.8107083814279
RPS6KC1	1.12935290695918	6.13557202087462	7.75382581852041	1.53062087673857e-11	3.1654760118453e-10	15.8065274317356
GGPS1	1.07413642088491	6.27761473589642	7.74681168660022	1.58152698656204e-11	3.26140988952647e-10	15.7742866540318
SUCLG2	-1.21329766716401	9.35927676483023	-7.73720935229212	1.65396162572627e-11	3.40106657947303e-10	15.7301574694061
CYP2E1	-4.5468138383068	10.5426765601797	-7.73603497356629	1.66304418723269e-11	3.41326026409e-10	15.7247610775028
CCNA2	1.67537989692934	4.4789598945039	7.73148520298565	1.69870310357605e-11	3.47985035967193e-10	15.7038557911964
GNMT	-2.70775638766394	8.48839609056679	-7.7290914050429	1.71776912845012e-11	3.51558175220515e-10	15.6928576514036
DONSON	1.28384115103706	5.8484676769058	7.727000711348	1.73459521288881e-11	3.54666573604168e-10	15.6832526026307
MPEG1	-1.38426380428456	6.71539736557009	-7.72451753603471	1.75479333950878e-11	3.58457926230034e-10	15.671845023999
CDC25B	1.19745530498453	7.40826910298586	7.72392625643976	1.75963721734891e-11	3.59108620803544e-10	15.6691288133525
SPAG5	1.21295570066129	6.4757510603118	7.70886457379314	1.88761567849457e-11	3.83060377567413e-10	15.5999513609562
CCL19	-1.84988228646294	5.74383661751883	-7.69291913674232	2.03321215416221e-11	4.09942945132648e-10	15.5267416556088
KIF15	1.33036562258695	4.12536856453957	7.68499839457117	2.10963861631368e-11	4.2335500425431e-10	15.4903857866722
SULT1A2	-1.29198198417698	8.57649138155635	-7.66256668137745	2.34195013957572e-11	4.66515606000305e-10	15.3874629056117
ATP11C	-1.12936752437924	5.6243667442859	-7.66067984839499	2.36261464460712e-11	4.6933665045576e-10	15.3788081601754
RAB17	-1.19398339745431	7.78353263482627	-7.65923867251243	2.37852049848443e-11	4.71630992249848e-10	15.3721978765118
TK1	1.12327644663646	5.75596623345224	7.65013878691496	2.48144382589405e-11	4.89350666321346e-10	15.3304645788418
SRD5A1	-1.74526948163498	7.01746148051262	-7.64912643767171	2.49316444350458e-11	4.90768088138225e-10	15.3258223888079
NAMPT	-1.57964602129383	8.17981469824283	-7.64230808617108	2.57355306387236e-11	5.03843982748899e-10	15.2945594527002
CYP4F2	-1.86250699480548	8.78476702880169	-7.63908644923119	2.61242862402589e-11	5.1099292679343e-10	15.2797897165494
FAIM	1.34609861076113	5.31488289694808	7.6279640973824	2.75118922566699e-11	5.3619712244255e-10	15.2288079539306
ADH1C	-3.1993505173519	10.2380478684106	-7.62469144889627	2.79339769814879e-11	5.43933816169207e-10	15.2138097585837
WSB2	1.08160029045093	8.54132639661778	7.62341280623962	2.8100633294066e-11	5.46687342961734e-10	15.2079502136521
CLGN	2.40339440980512	5.21648304174924	7.60572760333888	3.05097929562694e-11	5.89320737628993e-10	15.126924997803
GPT2	-1.73817791327734	7.24941595058792	-7.59456490914864	3.21351230422982e-11	6.15771521446799e-10	15.0758017004269
GRAMD1C	-1.70960439329133	6.47609351083366	-7.57718327283559	3.48391122770544e-11	6.63475196248952e-10	14.9962260997375
IL1RAP	-1.58513615937224	7.65023543255384	-7.57499976398123	3.51944179204148e-11	6.696526636474e-10	14.9862322393267
IFITM1	-1.62702037212643	8.85760679660457	-7.5732933746884	3.5474593419394e-11	6.74391019587478e-10	14.9784225409722
CDCA7L	1.71555358954097	5.52349190262915	7.57254057926534	3.55989008559681e-11	6.75567923079997e-10	14.9749773042012
HN1	1.16385975631816	6.86101349213899	7.56220416403064	3.73502123750005e-11	7.05095160031287e-10	14.9276786767364
PLP2	1.48732886969496	6.83550948322103	7.55929257089364	3.78588210810075e-11	7.11594663947097e-10	14.9143577903982
CSF1R	-1.14686084422893	7.21409658402695	-7.53975129882022	4.14553239693162e-11	7.72968804241668e-10	14.8249809266823
CPT2	-1.09892727308061	7.22392191240587	-7.53696192164268	4.19956957688734e-11	7.81213746119773e-10	14.8122268440914
C1R	-1.88522730071102	10.4239982131061	-7.52734473185261	4.39130793581574e-11	8.13387431430438e-10	14.7682608205317
CCL21	-1.54811924316607	5.55737314229092	-7.52512268981037	4.43683308471464e-11	8.19716269482305e-10	14.7581041499115
SERPINE1	-2.32627003680371	7.43216252463998	-7.52487587005505	4.44191880614124e-11	8.19956248161775e-10	14.7569760062902
CYP2J2	-1.67096231582486	8.13458950951249	-7.51864799954955	4.57218104535578e-11	8.40309624314932e-10	14.7285126822013
DMGDH	-1.43506212695254	5.55770734522394	-7.50575949658548	4.85394967463787e-11	8.83214893318771e-10	14.6696236392348
LOC149703	-2.29497829392315	8.00582163211785	-7.50114332846084	4.95901479158882e-11	9.00818349683496e-10	14.6485369402686
PCK2	-1.54604519112879	9.73871991134892	-7.48796756656927	5.27150508855159e-11	9.51199164020064e-10	14.5883648453441
HPR	-2.84411427615679	8.3938356180473	-7.48732395451484	5.28726163536905e-11	9.51553336119226e-10	14.5854261158712
SLC38A6	1.29531469354185	5.60242192641036	7.48716965269912	5.29104612149609e-11	9.51553336119226e-10	14.5847215824312
TSLP	-1.57551888801392	4.15465570973709	-7.48562639525896	5.32904539841479e-11	9.56042758376992e-10	14.5776753234818
CTD-2292M16.8	1.22685333404252	3.72951501129608	7.48049872424865	5.45726281787604e-11	9.78175291458885e-10	14.5542654205486
MTHFD1	-1.24205822203802	9.95950887779099	-7.46731880856909	5.80107964128709e-11	1.03213457249621e-09	14.494109319985
ABAT	-1.5549187869695	8.78940601968556	-7.45313604445778	6.19515081958353e-11	1.09595454323576e-09	14.4294012351616
ACSL1	-1.92459636881079	9.97981362557802	-7.45127557823364	6.24878152622544e-11	1.10362860022316e-09	14.4209149147593
LECT2	-3.23428692584917	9.47705346472453	-7.44856639471524	6.32770450800559e-11	1.11643138364267e-09	14.4085580743943
LINC00261	-1.30550015513557	9.31788287078874	-7.44731298000979	6.36455318488682e-11	1.12042008221426e-09	14.4028414594478
MPDZ	-1.31895247695623	8.03984758713172	-7.44034118786045	6.57344305407492e-11	1.15157574797641e-09	14.3710480683015
MASP2	-1.57617466406941	6.82513955846215	-7.41050615215072	7.5471458344004e-11	1.30460868452437e-09	14.2350648455151
MRC1	-2.07085494790746	7.49392847952173	-7.40389004796618	7.78179019086487e-11	1.34155336785666e-09	14.2049259576106
EMILIN1	-1.32231907256668	5.21766960305192	-7.40069551350858	7.89766903151777e-11	1.35936587869201e-09	14.19037575925
ACADSB	-1.62319706436044	8.198878385652	-7.38211433087198	8.60650790291692e-11	1.47317561756411e-09	14.1057714136747
PRG4	-1.94080588489169	4.92996967373497	-7.37558323095815	8.87039564172233e-11	1.51714594652617e-09	14.0760451216913
SPP2	-2.8496298139552	8.61271150376536	-7.37451827412286	8.9141812688844e-11	1.52343146815433e-09	14.0711985323473
TMEM106C	1.05105425219201	6.14264773153653	7.37195174097844	9.02058900024596e-11	1.53918686857625e-09	14.0595189573251
BDH1	-1.01866534340922	6.08435291280222	-7.36019627290626	9.52433225018069e-11	1.61622544054203e-09	14.0060348345181
SLC10A1	-3.06048929052461	9.49865610054168	-7.35053347514945	9.95926699519685e-11	1.67819461670815e-09	13.9620862760258
CRNDE	1.93388083119658	4.05786688888889	7.34956443817118	1.00039591349771e-10	1.68441467456967e-09	13.9576796050023
SPATC1L	1.0666411140952	4.08854309109526	7.34418215450834	1.0255844082154e-10	1.72414434713417e-09	13.9332062218329
GLS2	-1.58475559858532	4.81639103078346	-7.34382058080065	1.02729895512717e-10	1.7246491189405e-09	13.9315622837614
TMEM47	-1.35066007633363	7.16146204954419	-7.34378293033302	1.02747765364303e-10	1.7246491189405e-09	13.9313911024758
PON1	-2.07995607469422	8.31763320901044	-7.33607193539001	1.06473480478092e-10	1.78166172549624e-09	13.8963366011956
PIK3C2G	-1.42521824979738	5.65964481576166	-7.3301553297178	1.09422979395455e-10	1.82960291339751e-09	13.8694452077234
PPAP2B	-1.44971250267094	9.52165569731801	-7.30362630234201	1.23678513586953e-10	2.04740891031979e-09	13.7489307238963
TTR	-1.94929301197318	12.2239603420531	-7.3030720126061	1.23995258526269e-10	2.05108428790626e-09	13.7464138158718
NAT1	-1.48110623196655	6.20376678861144	-7.3013252351122	1.24998725135732e-10	2.06452890569336e-09	13.7384823754197
LIPC	-1.88434915574344	8.29022116488308	-7.29176531614607	1.30635245715029e-10	2.14616462478568e-09	13.6950823766818
F8	-1.32257881580643	7.02677752602722	-7.29108212895073	1.31047589639907e-10	2.14967686247947e-09	13.6919813644719
SAMD5	-1.18743154336133	4.5547846243229	-7.28568100712868	1.34353347094452e-10	2.19558718840466e-09	13.6674678849408
FAM222A	1.10243326077587	5.85862353468094	7.27592582663746	1.40535376280352e-10	2.28483916536219e-09	13.6232040166995
FAM50A	1.06153876186266	7.46948313740256	7.26677471473108	1.46591235895697e-10	2.37230196625525e-09	13.5816939165415
ACOT12	-2.27096169455497	7.5403251806051	-7.25645517097122	1.53731869017918e-10	2.47675309512275e-09	13.5348987131705
LRRC1	1.05045186660035	4.57452277962743	7.23967139640475	1.66090727025626e-10	2.65610229858633e-09	13.458824883266
SQLE	1.29870107136015	5.75135477117189	7.23123249197146	1.72672776170508e-10	2.75322799883653e-09	13.420590985383
SRGN	-1.27403153594717	6.66358619295812	-7.22897282946122	1.74478795552973e-10	2.77793335302098e-09	13.410355040876
PRTFDC1	1.27255180279252	4.4777713637865	7.22133148455213	1.80726251052107e-10	2.86686118244049e-09	13.3757466418454
DNAJC12	-1.34697028284335	5.43184640864051	-7.21920338903948	1.82505375912148e-10	2.89084777222073e-09	13.3661098838072
SLA	-1.02049844906793	6.39165049464923	-7.21702206970605	1.84347054612893e-10	2.90937811481995e-09	13.3562328327049
ADAMTS1	-1.37433443633952	5.78093098678822	-7.20563402446067	1.94265939658215e-10	3.05478605041346e-09	13.3046794941021
GADD45A	-1.39887443821839	9.28111460879905	-7.20433552709022	1.95430064293198e-10	3.07086152550117e-09	13.2988025107449
ZFP36	-1.36837623088896	9.19839219342053	-7.19477675393134	2.04215614524575e-10	3.19582674285638e-09	13.2555476912391
ZNF57	1.58259840205939	4.62239186741974	7.19438962382967	2.04579578221296e-10	3.19838383193192e-09	13.2537961721923
CD69	-1.58933717071913	4.37466088208482	-7.17502762369327	2.23629007907545e-10	3.46228577719176e-09	13.1662253556229
GCH1	-1.90333728653662	8.8746042468622	-7.16996149107899	2.28897661067345e-10	3.53014320163192e-09	13.1433219156786
MND1	1.11679028739316	3.32085433333333	7.16603112590103	2.33069908593869e-10	3.58427750765841e-09	13.1255559631243
CAPN3	-1.07614112126068	5.47354237547893	-7.1657991048818	2.33318556199001e-10	3.58510209152509e-09	13.124507263443
SERPINB9	-1.08914716799292	5.82843974580526	-7.16277911189127	2.36579094383113e-10	3.63050824286147e-09	13.1108581367295
MYO5C	1.12797687497237	7.07378689285242	7.15133666717721	2.49348740660967e-10	3.7995413663138e-09	13.0591562049565
GIMAP4	-1.00646178792734	6.24120336781609	-7.15053324186874	2.5027065089166e-10	3.81090745693187e-09	13.0555267688114
LEAP2	-1.63387710971117	10.6561112397939	-7.13294615476821	2.71321339484912e-10	4.09973549467328e-09	12.9761039979144
CD8A	-1.21058441382994	6.00871354710001	-7.12649685991296	2.79473658284038e-10	4.21703353506918e-09	12.9469917305587
ASS1	-1.59236451695586	11.4259939935923	-7.11816275602485	2.90369700856966e-10	4.35413790350131e-09	12.909381440462
GORAB	1.10884898950966	6.23126691478399	7.11249274723033	2.98022764844405e-10	4.46271571727241e-09	12.8838002291816
EPPK1	1.02808915012526	4.41958562379442	7.10720247162792	3.05343756453759e-10	4.55658742832064e-09	12.8599370170643
CPN1	-1.30359936316497	7.72197974481437	-7.1005246370063	3.14840383056464e-10	4.6886099135637e-09	12.8298214424729
PHLDA1	-1.50309933943044	6.26008790910292	-7.10003390328116	3.15549717770344e-10	4.69594366933419e-09	12.8276086317043
CRYL1	-1.3665370636789	8.60299371508786	-7.09635928378308	3.20911890253472e-10	4.76918679454937e-09	12.8110403497414
AIM1	-1.71370967555445	5.76733764083763	-7.09328550944232	3.25466698804188e-10	4.82363479069615e-09	12.7971829068519
ACSL4	2.11198850869437	5.44525686775003	7.0843223322825	3.39118303690447e-10	5.00546434435374e-09	12.7567833613411
CA2	-2.03243738489169	8.10569032699168	-7.08120471197468	3.43998716270648e-10	5.06707768939343e-09	12.7427345225158
FUOM	-1.21747016450228	7.80041474507861	-7.06653739804489	3.67911471318481e-10	5.37180518439586e-09	12.6766615647027
FAM216A	1.09198172366821	5.84617489410754	7.05315161741723	3.91171504464617e-10	5.66936853157453e-09	12.6163933790052
IGLC1	-1.34653408898836	5.97863771924957	-7.04522121198213	4.05634474692426e-10	5.85156780847109e-09	12.5807018916035
SCRIB	1.01276676685456	7.17570721634298	7.02559879835048	4.43742354309749e-10	6.34214732532607e-09	12.4924359199215
EVA1A	-1.60079956419467	7.57435326033822	-7.02183976107467	4.51438197329912e-10	6.42947916879381e-09	12.4755345307115
AGTR1	-1.56566383144526	7.98781262379442	-7.01405612117476	4.67797198707172e-10	6.63822381356505e-09	12.4405455286332
LAP3	-1.0613197819776	9.40360772889417	-7.01330062834338	4.69416014206094e-10	6.65636211892897e-09	12.4371500010961
IYD	-1.2602254434958	4.12599391181134	-7.01203299600397	4.72144704428534e-10	6.69067361583183e-09	12.4314529102225
ABLIM3	-1.34887417706491	6.89437588433082	-7.0091401782446	4.78430841471574e-10	6.76646832814107e-09	12.4184528379435
LOC728040	-1.17334121618958	5.58124258481966	-7.00631561184572	4.84648792184809e-10	6.83548623476021e-09	12.4057608949613
BGN	-1.39381112297377	7.14743765570088	-6.99113919861409	5.19456650388031e-10	7.2848412246451e-09	12.3375910167813
SLC46A3	-1.83308114391762	8.15690846082706	-6.98440793959574	5.35678718577632e-10	7.49292719209396e-09	12.307368366012
CDA	-1.66864975259726	6.39189630935394	-6.98424025691871	5.36089179737163e-10	7.49382763644208e-09	12.3066155909048
HEY1	1.24678553200523	6.50944322691241	6.9826775020727	5.39929599849004e-10	7.53777925566117e-09	12.2996001813466
NADK2	-1.1079481546198	8.16890910331616	-6.9717552226968	5.67543666775815e-10	7.87253236175319e-09	12.250580796706
SPINK1	3.79031584298556	7.79227033188004	6.96775998489918	5.7799080897835e-10	7.99184865057996e-09	12.232655424075
CYP8B1	-3.10168554931108	9.6080970429383	-6.96334270506042	5.89763760028426e-10	8.12913184010314e-09	12.2128398150827
FCGR3B	-1.21037314675434	5.67844826621747	-6.96330282554791	5.8987112346703e-10	8.12913184010314e-09	12.2126609343436
ENO3	-1.05853413273652	4.92500755423438	-6.94645503362742	6.37007710539387e-10	8.71328361106086e-09	12.1371153317659
PSRC1	1.2142786111019	4.7684541794821	6.94391525915658	6.44430436685671e-10	8.80369226848885e-09	12.1257314265362
ADHFE1	-1.16263251740716	7.78090722691241	-6.93351226292956	6.75740259440925e-10	9.19660832034842e-09	12.0791148556479
ASL	-1.10871508699896	9.63938182851103	-6.93163162883577	6.81559332468384e-10	9.25834644036256e-09	12.0706897097124
SIGIRR	-1.21913312103964	7.42814493764038	-6.93058627107332	6.84815353411287e-10	9.29172705604623e-09	12.066006839738
EVI2B	-1.36516879654804	6.10335117340468	-6.92927651750977	6.88916685161026e-10	9.32319561486981e-09	12.0601398434543
C12orf75	1.95769086334918	4.7872037383406	6.92455657675491	7.03899739316511e-10	9.51407057142347e-09	12.0389996422005
SFN	1.82037065460139	6.41340730545647	6.92208293902617	7.11880730692316e-10	9.60994604842937e-09	12.0279220711999
CCL5	-1.25345795496242	6.49674433254063	-6.91030810058253	7.51119072831986e-10	1.00768161611097e-08	11.9752068660766
AKR1C3	1.44300987805777	10.9544840632845	6.89945634227574	7.89177418139001e-10	1.05677542578626e-08	11.9266469942697
CYP2B7P	-2.40426366458517	6.58851545811864	-6.8894783414687	8.25856282224344e-10	1.10452539092055e-08	11.8820164338655
GLUD1	-1.34422224841585	9.15184814440481	-6.87966905610207	8.63561968092801e-10	1.14856924417159e-08	11.8381587311501
IL10RA	-1.15440872082228	6.21535628193949	-6.87326494592955	8.89094664454261e-10	1.18035357261975e-08	11.8095354916345
PPP1R3B	-1.00643375547082	5.79056150508654	-6.86781481324418	9.1141260225253e-10	1.20749909444668e-08	11.7851821814836
GJB2	-1.55008597664309	6.27236371845686	-6.86335309684863	9.30095894633542e-10	1.2265143974726e-08	11.7652496990738
TET1	1.05401939335581	3.61424595309816	6.83672727453087	1.04975339316036e-09	1.37177490779127e-08	11.6463793910307
GCGR	-1.30963473820181	6.10171462749372	-6.83573343779637	1.05450364352679e-09	1.3771512299931e-08	11.6419450726322
ZIC2	1.56195575300251	3.60423625320386	6.82404889769451	1.11197625334724e-09	1.44350250681821e-08	11.5898251389475
ART4	-1.36302359771957	6.07350868820188	-6.81535403601109	1.15674883868457e-09	1.49892774410753e-08	11.5510581711975
HERC5	-1.14878733380305	6.11738416508125	-6.80488746923709	1.21302046287759e-09	1.56435569283433e-08	11.5044114900619
MBL2	-2.64417360845859	8.47735056011362	-6.80261278119288	1.22560434796879e-09	1.5796435087243e-08	11.4942766624102
ZSWIM6	-1.09712673921492	7.67836466554366	-6.80092148284513	1.23504464143308e-09	1.58708733655492e-08	11.4867417766708
ITIH4	-1.07714394715223	7.85609103210464	-6.79257290060994	1.28271030783235e-09	1.64346309440792e-08	11.4495563685612
GPR126	-1.11009759364868	5.67792934562029	-6.78820183275988	1.30838936605205e-09	1.67339367649882e-08	11.4300927044191
SLC22A7	-1.88268350206307	7.13544036107808	-6.76114069941281	1.47910130590411e-09	1.87841528309336e-08	11.3096786201524
PROS1	-1.41850709755379	9.44718816633637	-6.75227998860088	1.5396594289398e-09	1.94846555317554e-08	11.2702830302821
LOC286052	1.41299758187813	5.96791350376536	6.74904836136693	1.56235198877505e-09	1.97372273121039e-08	11.2559188511215
SLC25A18	-2.04429561777925	8.15694002933016	-6.74764001144477	1.57234485635476e-09	1.98518852330318e-08	11.2496595743281
CTHRC1	2.44694580940539	4.8411183634562	6.7375787998629	1.64559988026886e-09	2.06923195165283e-08	11.2049552118123
RBP5	-1.76637032775198	7.90095033346545	-6.733673181527	1.67493893959673e-09	2.10368056027193e-08	11.1876071792653
SEC14L2	-1.44790394866269	6.14453441736029	-6.7212130465331	1.77204805180198e-09	2.21664682066253e-08	11.1322824579223
MTTP	-1.87919195426245	8.80499158462148	-6.72018895180043	1.78027318437111e-09	2.22564984186995e-08	11.1277367547202
LRRK2	-1.02003371031351	4.5035477687277	-6.7193790561576	1.78680472991289e-09	2.23252641758821e-08	11.1241419813101
AR	-1.65897627455423	7.24114451459902	-6.71436974039348	1.82773409448632e-09	2.28103321889985e-08	11.1019108207995
APOBEC3B	1.84913050151046	4.60665497106619	6.7097354234011	1.8664260440632e-09	2.32530052543731e-08	11.0813485094242
BCHE	-2.72503260789677	8.61631583584357	-6.70593579639913	1.89875372615941e-09	2.3614999674055e-08	11.0644930094192
PON3	-1.66206205923961	11.0667835323028	-6.69984509674941	1.95173522826161e-09	2.42044231944723e-08	11.0374803533465
TMEM192	-1.01969711780688	7.37334756777646	-6.69827816997815	1.96560075979143e-09	2.43484858419701e-08	11.0305321780813
ALDH8A1	-2.48263914031646	9.86011538294358	-6.68104730862088	2.12466253923699e-09	2.61393852057379e-08	10.9541597551769
ACSM5	-1.78097980292145	7.30518153018893	-6.67449366602967	2.18845212835389e-09	2.68783629808546e-08	10.9251283827122
IMPDH2	1.06726615654472	8.6457371780288	6.67278523853607	2.20539044237452e-09	2.70403846255581e-08	10.917561867227
DHTKD1	-1.14666526173372	8.72994620425419	-6.66031378144795	2.33303655391387e-09	2.85730998313897e-08	10.8623453063209
CPN2	-1.70006710596264	8.1255964511164	-6.64810494088645	2.46507621592688e-09	3.00881033277705e-08	10.8083235083641
CD24	2.21124430776599	7.53493670973709	6.64401053795444	2.51099399784499e-09	3.06312974846973e-08	10.7902136890117
CNTN3	-1.93745835645078	5.09834443110054	-6.63394990754824	2.62745086910123e-09	3.18723774054055e-08	10.7457301368287
LAPTM4B	1.50425210543766	7.58906196710266	6.61057190944491	2.91912386132002e-09	3.51408648493404e-08	10.6424477105276
LRG1	-1.38382186204133	9.27842533458845	-6.61041108124118	2.92123755270922e-09	3.51408648493404e-08	10.6417375939052
C11orf96	-1.84462631073165	7.9400123919276	-6.608666899976	2.94425809008342e-09	3.53899554319774e-08	10.6340367446328
STK39	1.53826897931403	4.54038416276919	6.6085948329154	2.9452131200491e-09	3.53899554319774e-08	10.6337185709177
NR3C2	-1.14723197622863	6.03365253065134	-6.6076280207656	2.95805497670616e-09	3.55245504218627e-08	10.6294502366715
EHHADH	-1.72250334056329	8.52965915015194	-6.60167018534368	3.03842349632183e-09	3.63888185651861e-08	10.6031517788306
WASF1	1.06474322823644	6.00553491313251	6.59379559577432	3.14797388214028e-09	3.75120689274646e-08	10.5684045330908
SLC39A5	-1.21737205106101	7.16997736675915	-6.57369847986128	3.4456071535992e-09	4.07025268395437e-08	10.4797864579576
C1S	-1.91110478341438	9.6441082146915	-6.57334459303848	3.45109026634344e-09	4.07398174732627e-08	10.4782267992659
TNFSF4	1.29150658144526	4.40383019421324	6.57325196267129	3.45252690451379e-09	4.07398174732627e-08	10.4778185610402
ADRB2	-1.44646498448092	6.53019628147708	-6.56327696065431	3.61074814660349e-09	4.24449129307303e-08	10.4338681772078
TP53I3	1.30833603649978	6.47426489252213	6.56141048734256	3.64114103944519e-09	4.27789619788967e-08	10.425646866275
TSKU	-1.43176884615385	8.39593906321839	-6.55085661256712	3.8178212175782e-09	4.47091848697787e-08	10.3791745953186
ALDOB	-1.4320763390252	7.60060910001321	-6.54603512074318	3.90133543372562e-09	4.55885678070485e-08	10.3579522767356
EPSTI1	-1.02992848966622	5.14141282798256	-6.54166820298715	3.97853496983444e-09	4.64155267790006e-08	10.3387353425129
RBM24	1.7070982673519	4.04949931358172	6.53024262436571	4.18774571078957e-09	4.85944575968524e-08	10.2884766961474
ENPEP	-1.57236831797082	6.32823103382217	-6.5261063998491	4.26613705626182e-09	4.93982169407685e-08	10.2702896527628
IGF2BP3	1.22156210446139	3.62419963971463	6.51807175150568	4.42258627068219e-09	5.09644813832259e-08	10.2349723332575
MFAP4	-1.02141662293693	4.95615107570353	-6.51708976439578	4.44209254866715e-09	5.11620372107925e-08	10.2306568960883
CTB-31O20.2	1.00220953232759	4.72324873047959	6.51263008240222	4.53175680962738e-09	5.21115933079457e-08	10.2110611734645
ETNPPL	-2.37454086122164	8.7769705714097	-6.49029271445326	5.00852747223548e-09	5.71088179864744e-08	10.1129802819966
SLC27A2	-1.92499944330239	8.86077544920069	-6.47838511745164	5.28262952734481e-09	5.97309541282492e-08	10.0607425955721
SLC6A12	-1.51766275214596	6.54170214883076	-6.4767452512913	5.32152231917274e-09	6.01079409374269e-08	10.0535512217463
SCARNA17	-1.51269631319076	6.24967543433743	-6.47617724741164	5.33505964410676e-09	6.02294298612324e-08	10.0510604770289
BEX2	2.19730504541519	5.30717227837231	6.47450394473317	5.37513806393049e-09	6.05871236326325e-08	10.0437233426757
MARC2	-1.0006063840812	8.41192403831418	-6.47295287477658	5.41255475632501e-09	6.09494478269192e-08	10.0369227620703
APOA5	-1.73605564994106	8.21172048962875	-6.45985688789131	5.73891798085738e-09	6.40210154763034e-08	9.9795266293744
ASPN	-1.31723571406204	5.70366556506804	-6.44008071093205	6.26899395805605e-09	6.92210740304883e-08	9.89292973510009
TMEM100	-1.2311572368295	4.27146902259215	-6.43422052576212	6.43517175472918e-09	7.08392343696751e-08	9.86728670436621
CYP1A1	-2.27515566679561	6.43361153765359	-6.43383437028091	6.44627374370241e-09	7.08893678884654e-08	9.86559725065833
GADD45G	-1.71212992863063	7.25709740778174	-6.41314845059809	7.06951752260731e-09	7.71553744541411e-08	9.77514729566047
AOX1	-2.21136188896257	9.17758099524376	-6.41001801369996	7.16888728578478e-09	7.79647997986428e-08	9.76146830756145
TPD52L1	-1.06268210086944	7.15824669176906	-6.40817999152811	7.22787407426158e-09	7.84660184343256e-08	9.75343785280931
FLVCR1-AS1	1.1301039704723	5.50983266481702	6.40787140034181	7.23782449405607e-09	7.85173415680341e-08	9.75208967514999
RNA45S5	-1.00901657673887	5.88572875135421	-6.40664638128541	7.27745862271302e-09	7.89077674299474e-08	9.74673802124037
FLJ36848	-1.50737247571286	6.10549335130136	-6.3946105867535	7.67845703493427e-09	8.2882168582967e-08	9.69417743874168
ID2	-1.16091222181697	9.54105645144669	-6.39430554440337	7.68889906011402e-09	8.29535283251863e-08	9.69284576917448
TBX15	-1.40247417395188	5.51068007761924	-6.39252443715335	7.75014978383492e-09	8.3572705811443e-08	9.68507075577568
DUSP6	-1.2510000438771	8.5587924396882	-6.38210374959416	8.11829841579654e-09	8.70656342730274e-08	9.63959715301242
SLC39A10	1.44940925606948	5.13972942053111	6.38177468551798	8.13020115345872e-09	8.71501215721989e-08	9.63816162162774
ACSL5	-1.48244446868553	8.05146964592416	-6.37271009986542	8.46495132968195e-09	9.02469675734138e-08	9.59862809995023
ZNF320	1.0600581716033	4.45730994893645	6.37018483215178	8.56061077828638e-09	9.11322051043436e-08	9.58761820498795
PCK1	-3.12422185449823	10.5773572276391	-6.36966149677338	8.58056848717397e-09	9.12997786008737e-08	9.58533671553533
ECHDC2	-1.06413926123637	9.16569801796803	-6.36120778562326	8.90940243216681e-09	9.45663190508372e-08	9.54849197652581
UPB1	-1.26862504765325	7.08681424957062	-6.35503210597012	9.15747023224054e-09	9.69143220619278e-08	9.52158700067806
SLC1A1	-1.53911613848364	6.42063900700225	-6.34127744407909	9.734777855066e-09	1.02522930396763e-07	9.46169746006031
METTL7B	-1.22014888232206	9.19620475723345	-6.33956513236368	9.8091189044379e-09	1.03205467268121e-07	9.45424513806502
CDCA7	1.3943904002542	3.94372346161976	6.3327608520557	1.01101167768287e-08	1.06045858665955e-07	9.42463880021558
FMO4	-1.11396797531683	7.15583783088915	-6.32940810846348	1.02617699266837e-08	1.07497873353886e-07	9.41005482898093
HAGH	-1.01890390482243	8.4967433316158	-6.32907725592242	1.0276856559685e-08	1.0760385642498e-07	9.40861581910516
THBS4	1.13729171360153	5.35065672321311	6.31733884317535	1.08265420536705e-08	1.12705343792369e-07	9.35757859636607
C1QA	-1.35097536510831	8.05528362894702	-6.31419219634929	1.09787670593095e-08	1.14180232053424e-07	9.34390325703877
EPS8L3	1.35223603045793	5.06656050634166	6.30757804373523	1.13056685943477e-08	1.17354574340082e-07	9.31516629370417
GREM2	-1.10308300456823	4.15905904227771	-6.30174618880572	1.16018732720185e-08	1.20198737779433e-07	9.28983744058814
FGA	-1.1991526922156	10.6087528220373	-6.29368140415638	1.20241623971136e-08	1.24098755188132e-07	9.25482481331047
AZGP1	-1.72246656590776	10.8671130980314	-6.27982596531845	1.27854076890347e-08	1.31018661945418e-07	9.19471134029382
ABCB4	-1.89221076996758	7.74424734707359	-6.26429953474671	1.36951327974725e-08	1.39482930603797e-07	9.12740672984521
SLCO1B1	-1.97068410014183	8.29817588816224	-6.25330629057102	1.4377628774487e-08	1.45476072828957e-07	9.07979048747329
ITGA2	1.05830651524278	3.7038383785837	6.25041524142822	1.45626256915312e-08	1.46935943196051e-07	9.06727338780623
SPRY2	-1.16559250855622	6.41296493618708	-6.24852443820767	1.46848870886167e-08	1.48100540349239e-07	9.05908813574972
TMEM56	-1.06453769753904	8.58896025617651	-6.23484392908344	1.56002064388249e-08	1.56240180397722e-07	8.99989330608218
ABCC2	-1.15143233173077	7.86745881800766	-6.23430571191289	1.56373463306231e-08	1.56467403002302e-07	8.99756547189879
BST2	-1.20516936901341	7.72131912973973	-6.22916762063524	1.59963277900003e-08	1.59469836849391e-07	8.9753466310295
AK025288	-1.38745135833886	7.49496683604175	-6.21600729305076	1.69533408256504e-08	1.68313016459334e-07	8.91846867151091
UBE2Q2	1.30671522117227	6.69634918126569	6.21123727236486	1.73139970323868e-08	1.71578937181818e-07	8.89786430872581
UGT2B28	-1.70433891326812	10.7220227864315	-6.19240568973373	1.88133339989015e-08	1.85165964126461e-07	8.8165793894872
HAO1	-2.14875293998674	9.04795663832739	-6.19179154614195	1.88643311295859e-08	1.85492691234773e-07	8.81393008562242
LMNB1	1.06766347318008	5.2779921806051	6.18834236816211	1.91532894425693e-08	1.87913990167627e-07	8.79905283639182
PKM	1.08618932850722	5.90269991068833	6.18305795931698	1.9604493578785e-08	1.91906012414752e-07	8.77626592649536
CFL2	-1.0167930902962	7.67342776126305	-6.17812650438146	2.00350199612428e-08	1.95766375099635e-07	8.75500776388241
HCK	-1.02880387985374	5.33512065028405	-6.17179180673583	2.06017726565788e-08	2.01032079014376e-07	8.72771022362749
ERICH5	1.89856784223033	5.56725106856916	6.16295988110534	2.14184497983724e-08	2.08156953987503e-07	8.68966971669381
AGL	-1.2235841104664	8.57608185387766	-6.15954460572887	2.17427539331551e-08	2.11024585797673e-07	8.67496525481603
FAM149A	-1.24428835923224	6.36614585308495	-6.14953244580204	2.27216726791855e-08	2.19737551818849e-07	8.63187621009956
HSD17B6	-2.30988556163424	10.4159759715947	-6.14908297979229	2.27666241435304e-08	2.20073978830297e-07	8.62994249728146
LOC101928505	-1.20474120182177	5.60830046439424	-6.14745863820553	2.29298089310417e-08	2.21072424701973e-07	8.62295464221828
GSAP	-1.00814834449602	7.31636738287753	-6.13165297074898	2.45791866587558e-08	2.35446124513706e-07	8.55499700192024
LINC01018	-1.55645314645041	6.13380464599022	-6.12408509200972	2.54098484469685e-08	2.42058710260541e-07	8.52248266523961
ASRGL1	1.25460563577586	5.70484610173074	6.11807272419126	2.60894703167099e-08	2.47552717251411e-07	8.49666264003165
DAO	-1.55154013910993	7.39070525776192	-6.11590279977618	2.6339132394781e-08	2.49484354218807e-07	8.4873463892497
ABCA6	-1.78553581697613	7.50531017082838	-6.1124132930289	2.67455727880136e-08	2.53002135246334e-07	8.47236744462979
SMIM24	-2.01688147362216	6.41840892112564	-6.1120586370844	2.67872262089226e-08	2.53285506157992e-07	8.47084524913386
S100A12	-1.0536286663351	3.90733778577091	-6.11030301506573	2.69943640872469e-08	2.54688002431877e-07	8.46331057376477
HLF	-1.66123796288314	7.65439646109129	-6.10405014560893	2.77450326576938e-08	2.61201387885671e-07	8.43648184100637
A1BG	-2.14461629197981	10.8330959146519	-6.08858181054596	2.96916835567486e-08	2.77009991124302e-07	8.37015987508588
FXYD1	-1.98098885566791	8.14688428431761	-6.08618107905824	3.00056540112915e-08	2.79686795654969e-07	8.35987251844391
CYTIP	-1.30128050123416	5.15592200462412	-6.08322241744936	3.03971000120205e-08	2.82970080206483e-07	8.34719660767816
SMAD7	-1.00155500302093	5.8083742494385	-6.08157934991982	3.06166576109838e-08	2.84769109643742e-07	8.34015821211196
TRIM16	1.76195494046567	5.402530808297	6.06561219062268	3.2833448920665e-08	3.02915496156438e-07	8.27179948955617
C1QB	-1.44868437356321	8.02226598355133	-6.04278866671053	3.62795117736416e-08	3.31466272551325e-07	8.17421291481209
NUAK1	1.09414196198055	7.57855323734972	6.04268782081269	3.62955032660228e-08	3.31466272551325e-07	8.17378205789907
HSD17B2	-1.46707901810713	8.84170474303078	-6.03865344806529	3.69409820460136e-08	3.36398532472816e-07	8.15654787898039
MST1	-1.0645152711649	10.0262436720835	-6.03853894006979	3.69594670023885e-08	3.36398532472816e-07	8.15605878773396
SLC44A3	1.26745775648394	5.59641365992866	6.03660529913844	3.72729946917027e-08	3.38821223366683e-07	8.14780030979681
KIAA1462	1.03367308268862	3.56008795646717	6.02628670062803	3.89909622621027e-08	3.53103850213848e-07	8.10374830379121
TRMT11	-1.01213249243848	7.21218954174924	-6.02303806326846	3.95478253648206e-08	3.57622853494734e-07	8.08988562280082
ABCG2	-1.44130186314655	6.7140933896816	-6.02112694765979	3.98790742607693e-08	3.60092408243719e-07	8.08173187857077
SF3A2	1.1170949867374	6.17143189483419	6.01787366242494	4.0449262093422e-08	3.64632752751401e-07	8.0678542192718
ANGPTL3	-1.20941303562481	7.36246815629542	-6.01551996135112	4.08667886487575e-08	3.67937037260518e-07	8.05781586044314
HYAL1	-1.21297403139736	8.72776326443388	-6.0143126908695	4.10825941724357e-08	3.69572667891878e-07	8.05266756538417
ROBO1	1.90969997706676	7.57761470352755	5.99384700411936	4.49166535461058e-08	4.01395088416768e-07	7.96545802597914
HSD11B1	-2.93024756890104	9.53352130710794	-5.98812559700377	4.60502028664646e-08	4.09160871016643e-07	7.9410995240361
CD109	1.06850493635794	4.17408613700621	5.98346593847467	4.69941924969787e-08	4.16011958355306e-07	7.9212684406698
TRPM8	-1.1616971606985	5.70082414770776	-5.97661150390662	4.84175845891244e-08	4.27389302530905e-07	7.89210819672408
ZNF165	1.10957461466623	3.62553012220901	5.97260688079092	4.9268764647839e-08	4.34725574946886e-07	7.87507807552538
OTC	-2.17905683152814	8.22261530809882	-5.94845072639712	5.4724979946807e-08	4.78192086678052e-07	7.77245202343043
IGLL3P	-1.37263875977196	7.29290158759413	-5.93695903460168	5.75255839347743e-08	5.01248076032059e-07	7.72369125958771
AKR1C4	-1.99908936095454	9.32553098711851	-5.89869748016718	6.790711487669e-08	5.84678030077929e-07	7.56162909985499
LOC100129447	-1.04985898776894	5.06765541022592	-5.89285548796113	6.96468334628181e-08	5.98437652766032e-07	7.53692363377236
C1orf106	1.62232468957228	5.84666956097239	5.87991445489315	7.36584714577015e-08	6.29162478293338e-07	7.48223390662956
ALDOA	1.13338301027851	8.18661748725063	5.87558431969383	7.50509465449586e-08	6.40046532311142e-07	7.46394592841915
FLJ45482	1.1322289519415	5.11812055099749	5.87410041847384	7.55340755954683e-08	6.43913125538849e-07	7.45768011883471
ASAP2	1.03265590486848	5.27164614645264	5.86223058359248	7.95105143953791e-08	6.74360034548823e-07	7.40758390761119
LUM	-1.42883839354922	5.07225766851632	-5.85833860923227	8.08586838752927e-08	6.84721580739817e-07	7.39116745923676
LURAP1L	-1.17098570520188	7.10327460443916	-5.85103772614483	8.3448686894039e-08	7.04450065230654e-07	7.36038482787342
CEBPA	1.12484129693487	9.66174402206368	5.84505134563028	8.56331792318428e-08	7.20643307387133e-07	7.33515689327332
SERPINA7	-1.65908413367595	9.26165351274937	-5.83591751304676	8.90751426896655e-08	7.46417981679306e-07	7.29668645043184
LOC102724156	1.14024248432435	4.42587666052319	5.83319687725134	9.01264557733982e-08	7.54351815562965e-07	7.28523255350529
ZNF618	1.03220970035735	6.32530387210992	5.82978474438584	9.14622606258568e-08	7.64350570950088e-07	7.27087072958461
TMEM220	-1.01598118133841	7.60479766019289	-5.82874912274517	9.18715350192151e-08	7.67178691774417e-07	7.26651247343752
NFIL3	-1.06716593629347	8.53782691313251	-5.82711371777329	9.25215165201488e-08	7.72308557135999e-07	7.25963080650293
PNP	-1.00967130553713	7.09774992072929	-5.82570280921213	9.30859095225562e-08	7.76720307858154e-07	7.2536944798749
AASS	-1.52413971990127	5.49574764407451	-5.82297699735122	9.41859077605574e-08	7.84944702348564e-07	7.24222753749824
AQP9	-2.2632456233698	9.42424635427401	-5.82290147802346	9.42165649750112e-08	7.84944702348564e-07	7.24190987616708
C5orf27	-2.0914060893936	6.2385630110979	-5.8208457519149	9.50548746734111e-08	7.91319954365002e-07	7.23326344612835
ELOVL7	1.77987244934424	4.81389575881887	5.80131719073841	1.03393692532224e-07	8.56458922876908e-07	7.15119246404916
NOSTRIN	-1.02525998581639	5.10386216845026	-5.79681781997166	1.05414738596247e-07	8.70868117063921e-07	7.13230049025473
SALL1	-1.42646673686634	6.9502394914784	-5.78567716459612	1.10587780443444e-07	9.10131968811057e-07	7.08555082585477
SULT1E1	-1.47061286129531	4.67226871991016	-5.7754330904861	1.15564540036943e-07	9.4641413972009e-07	7.04259852114799
ASGR1	-1.01131161083481	9.39257084542212	-5.76975333906906	1.18418171613264e-07	9.67223187454546e-07	7.01879844670333
GOT1	-1.14119377186486	9.65108116712908	-5.76505289333763	1.20832121914391e-07	9.84711304408097e-07	6.99910984582096
VNN1	-1.86877245862805	8.26850637177963	-5.76486131610959	1.20931528080754e-07	9.84780134461289e-07	6.99830754370003
RAB26	-1.13999680629236	6.50156620531114	-5.75707914582158	1.25038307060803e-07	1.01440781670572e-06	6.96572678002883
BHMT	-1.95982163741527	10.4151830453164	-5.74014924932073	1.34452281588388e-07	1.08468526573523e-06	6.89491600692473
CYP3A7-CYP3AP1	-1.42187533688845	11.0710713413925	-5.72774237325565	1.41790582813249e-07	1.13304471667369e-06	6.8430824286828
LPCAT1	1.1015156722388	6.04547323325406	5.71700156874866	1.48460590489555e-07	1.17794692776487e-06	6.79825008703218
SLC51A	-2.18458751392573	8.09700034244947	-5.71681572245386	1.48578674981072e-07	1.17845203273449e-06	6.79747469424997
COL4A1	1.16205489815429	7.7553650540362	5.7100407081156	1.52947078561002e-07	1.20999747609842e-06	6.76921556611565
PRKAB2	1.03897854835323	7.32848430902365	5.70622827300117	1.55460550468131e-07	1.22629774108796e-06	6.75332024862186
SERPINF2	-1.26022661327549	8.8804628871053	-5.68106879301118	1.73096718172931e-07	1.35260311750215e-06	6.64854272436855
SLC38A4	-1.90401950086575	7.66398103989959	-5.67903755999551	1.7460349671088e-07	1.36268443518187e-06	6.64009277309302
PSAT1	-1.18371679700855	8.04522856321839	-5.66764007813439	1.83300464478734e-07	1.41902215136147e-06	6.59270472190659
PXMP2	-1.04275265893015	9.30463078484608	-5.64755471751223	1.99675036794669e-07	1.53644760899608e-06	6.50930074143502
AMDHD1	-1.34726644899425	9.12450653388823	-5.63392393090737	2.11597910071948e-07	1.61955798755316e-06	6.45277689830922
PTGFRN	1.02449008882258	6.3034828600872	5.6237352939198	2.20964238990866e-07	1.68114499889994e-06	6.41056814185805
FMO3	-2.26616594939949	9.75042949623464	-5.62358161872591	2.21108585113393e-07	1.68165233349501e-06	6.40993177831258
MNS1	1.26265637579207	3.84578106453957	5.60077037363522	2.43595244672792e-07	1.83208330423757e-06	6.31556095307849
RUNDC3B	-1.59286919531019	6.35807526595323	-5.58697658159565	2.58267362599925e-07	1.93236461726889e-06	6.2585825216774
GSPT2	-1.48339450443929	5.66309287627163	-5.58352452216594	2.62072987059753e-07	1.95745649838042e-06	6.24433329778993
SOWAHA	1.31810989544651	5.1486562087462	5.5831424855288	2.6249752278217e-07	1.95995133131114e-06	6.24275660170963
CYP3A5	-1.04744634272767	9.91337416369402	-5.58051235826289	2.65438624217023e-07	1.97986308307654e-06	6.23190322914165
HP	-1.84173447542734	12.6775924674329	-5.58032267914029	2.65651977070321e-07	1.98077212792826e-06	6.23112060013611
SLC13A5	-2.03487722912983	8.65295440850839	-5.5775394299017	2.68802039813106e-07	2.00012734298048e-06	6.21963816183276
PRCC	1.04693778345122	6.16487444669045	5.55258157801118	2.98739028955515e-07	2.20320033854692e-06	6.11679402340058
SLC25A15	-1.19901381148689	7.58691403474699	-5.54929524109494	3.02917284303858e-07	2.23249419912575e-06	6.10326822925029
CAPG	1.07367049268715	5.30193512755978	5.54761518141991	3.05075428346851e-07	2.24534270903955e-06	6.0963549635915
CNGA1	-1.13854320349801	6.34417286002114	-5.54627024764694	3.06813956338985e-07	2.25660414286958e-06	6.09082142104221
ACSM2B	-1.42459136997126	6.57704995105034	-5.53301753900307	3.24473731368654e-07	2.37921764487824e-06	6.03632911308363
MME	-1.61901214476495	5.38023997318008	-5.52723562022079	3.32487549275343e-07	2.43303579062487e-06	6.01257455667057
MLLT4-AS1	1.1105181857685	4.45788056638922	5.52651595337811	3.33498515981155e-07	2.43960924545268e-06	6.0096186917231
HPGD	-1.80561504072723	6.82793189589114	-5.51888242910553	3.44409373166741e-07	2.51348033609014e-06	5.97827708172114
CUX2	-1.39920176604406	7.11715265015194	-5.51136809572439	3.55491856353655e-07	2.58651383253551e-06	5.9474450995192
ACMSD	-1.59087870931882	8.60252082527414	-5.50945212073158	3.5837317261185e-07	2.60572676513243e-06	5.93958690507855
ARRDC4	-1.24742640013447	7.42220126066852	-5.48870274629902	3.91083071466668e-07	2.81894865062176e-06	5.8545694642489
DPYS	-1.74029066563513	10.1018514344035	-5.47412807015032	4.15793069480726e-07	2.97625366395576e-06	5.79494454072813
FAM110C	-1.69373759831822	7.28541764189457	-5.45516352622321	4.50250264119417e-07	3.19857905806356e-06	5.71747591776655
FGB	-1.53542369109195	12.1120436455278	-5.445894953949	4.68094728480239e-07	3.31338841313587e-06	5.67966221755791
COL21A1	1.07126405992116	4.83791891399128	5.44024411111889	4.79312590107263e-07	3.37843603958091e-06	5.65662346672436
ZNF468	1.15863047107096	5.02072438736953	5.43803889195617	4.83761483480651e-07	3.40757560240941e-06	5.64763586112193
CDO1	-1.65458248006926	8.51036283445634	-5.42782042669137	5.04910909077968e-07	3.53813460008584e-06	5.60601274567425
C4BPA	-1.60412620825045	11.4831396490289	-5.42191646359942	5.17541071979799e-07	3.61727463898599e-06	5.58198152551079
PHGDH	-1.00565208047819	7.44993442185229	-5.41649267379734	5.29416764135968e-07	3.69312538461215e-06	5.55991612774118
TRIM71	1.49894408604112	4.05752189126701	5.40332073533562	5.59381120746971e-07	3.87097456297033e-06	5.50637460937486
FABP1	-1.5561923561008	8.96417870656626	-5.3979210273133	5.72139733385367e-07	3.94413933364959e-06	5.48444441923752
LGSN	-1.11720279083775	3.84233681021271	-5.3884491452312	5.95212863089146e-07	4.08369585692943e-06	5.44600190775256
ALDH1L1	-1.22172076305998	7.22718821442727	-5.38464932226402	6.04723303059292e-07	4.1436942028933e-06	5.43058940014952
HIST1H2AE	1.01906925521294	4.10571615259612	5.37510906043701	6.29262643043689e-07	4.29159282346708e-06	5.39191688591208
AGPAT9	-1.47095262670388	6.99136526932224	-5.37331382139085	6.33988235817199e-07	4.31961839841089e-06	5.38464350625715
SULF2	-1.14464595138889	5.93780380076628	-5.36303887302688	6.61711678048974e-07	4.48452048976351e-06	5.34303808708992
GEM	-1.42769861435308	5.78330308382878	-5.35702191006236	6.78494375247398e-07	4.58677449492098e-06	5.31869264479472
KLB	1.20768310497716	8.17749938948342	5.3492806551919	7.00701187101869e-07	4.73098933717392e-06	5.2873906473617
APCS	-1.9975696476201	11.1350133827454	-5.34823374356166	7.03758541128737e-07	4.7486705176256e-06	5.28315917352139
RBP7	1.14857806620248	5.95802786543797	5.3480229933252	7.0437558539712e-07	4.75135344255571e-06	5.28230740017068
GPR160	1.17022223364279	4.85254600924825	5.34490790388534	7.13558154143058e-07	4.80431427601357e-06	5.26971934603644
UGT3A1	-1.06803316500884	5.2277724211917	-5.32332304322422	7.80487331870478e-07	5.20797910539028e-06	5.18259667309095
C1QC	-1.2010568982556	8.56246354095653	-5.32124016662932	7.87262140525613e-07	5.24994983948294e-06	5.17419901233407
ADIRF	-1.56505590045682	7.15976829541551	-5.30913014226251	8.27807689961585e-07	5.48653808103404e-06	5.12540729410283
FBLN5	-1.20495457492447	5.88906462901308	-5.30808926685718	8.31386598832726e-07	5.50520306560398e-06	5.12121620374853
LOC730101	1.42739787601312	5.51344238532171	5.30007864804952	8.59441802844291e-07	5.66326638983184e-06	5.08897539124074
XK	1.59793641604038	3.82902422010834	5.26046928706489	1.01237106356261e-06	6.58877987355611e-06	4.92992327266059
ITIH1	-1.18249401164161	11.2505737695865	-5.25936296350333	1.01700422889633e-06	6.61297074122889e-06	4.92548960337872
ERRFI1	-1.01492104063513	10.6228127409169	-5.25338188748017	1.04241405765724e-06	6.75992560360956e-06	4.90152834399385
CP	-1.07517012603153	9.93197156942793	-5.23582228813081	1.12065764281163e-06	7.22405476028585e-06	4.83126284902594
CRP	-2.80914388909151	8.59835086814639	-5.22121990727341	1.19007712201428e-06	7.62163263027956e-06	4.77292369965613
PAPSS2	-1.00557170779914	8.15003427586207	-5.18061798342762	1.40596404970742e-06	8.86527069549061e-06	4.61115900069621
BHLHE40	-1.19198809633804	7.66633336741974	-5.16126041730668	1.52194375879813e-06	9.52446480036298e-06	4.53426901244219
COCH	1.07277482401267	5.70050636002114	5.16100426867665	1.52353950146142e-06	9.52968024770523e-06	4.53325258607054
KIAA0907	1.06067913076555	6.82222768635223	5.15625815149177	1.5534043358854e-06	9.70732008222991e-06	4.51442429210717
NDRG1	1.18912511206897	9.20181428405338	5.14954847254335	1.59660345887817e-06	9.95429159086929e-06	4.48782202003281
CRYAA	-1.0084562528183	5.6457699445105	-5.14366908207018	1.63542071047852e-06	1.01728711990783e-05	4.46452675032607
RTP3	-1.54992085470085	7.13142254022989	-5.1278550731521	1.74446407987484e-06	1.07912934593945e-05	4.40193887859899
JUNB	-1.12594220650973	7.51845682078214	-5.12006075704884	1.80079181045302e-06	1.11044939922753e-05	4.37112875074968
PDK4	-1.31666237938403	6.1453837898005	-5.08086229289125	2.11213167158634e-06	1.28394124325825e-05	4.21656262975513
TPRG1	-1.02563502273062	4.41199491584093	-5.07975656419406	2.12163634839499e-06	1.28863371253287e-05	4.21221183470486
PLGLB2	-1.43253983341622	4.72883692185229	-5.07918099239255	2.12660039701675e-06	1.29092454153641e-05	4.20994729087755
LOC344887	1.30318166401415	3.80283333069098	5.07856162067992	2.13195487263112e-06	1.29381218769847e-05	4.20751057447811
LOC102724356	1.24152729955976	6.19760808039371	5.07476513705286	2.16506441739928e-06	1.31059938020539e-05	4.19257805555884
F13B	-1.54721710676392	7.46263953157617	-5.06606764457159	2.24282071298262e-06	1.35501665452602e-05	4.15839143107508
MYC	-1.51244992476237	8.20906589886379	-5.05850209190028	2.31267015943856e-06	1.39338891242735e-05	4.12867990442751
CES2	-1.28883137395004	9.91410862716343	-5.04294130809455	2.46307842446382e-06	1.47369541654919e-05	4.06764533192835
ACOX2	-1.04399934816166	8.92255393552649	-5.04273591370979	2.46512624622323e-06	1.47451322125612e-05	4.06684039181572
CYP4F11	-1.47212059450523	7.17343845124851	-5.04187999633276	2.473677818728e-06	1.47921971303279e-05	4.06348624614937
IL7R	-1.22491464806218	6.18028995574052	-5.02402895729607	2.65877609246117e-06	1.57919618328994e-05	3.99360301243494
CCL16	-1.63502097055519	7.42747626852953	-5.02281611494069	2.67183127931849e-06	1.58545252647529e-05	3.98885990059769
FGF13	1.4394261807766	4.53012603534152	5.02253673800236	2.67484738227257e-06	1.586807407352e-05	3.98776741881545
S100A8	-1.26781159713012	4.95067287950852	-5.00816885422954	2.83452216991371e-06	1.67510667426696e-05	3.93162791297198
GDA	-1.11113932474948	6.63509109433214	-5.00685798106373	2.84954498425971e-06	1.68179338375622e-05	3.92651035122728
GPX7	1.0095528029583	4.8594706695072	5.00026052687023	2.92634023960884e-06	1.72184905457202e-05	3.90076553032546
TMEM45A	-1.76945314798851	7.84634924402167	-4.96773418056327	3.33545707509105e-06	1.9388631421999e-05	3.77411454685699
DUSP10	-1.01577493773946	7.12537250178359	-4.96540953769736	3.36674349975651e-06	1.95180982597664e-05	3.76508041748592
TTPA	-1.13022669637857	5.16067331576166	-4.95292172539952	3.53977313905853e-06	2.03652182814996e-05	3.71659003549892
MATR3	1.09858942801356	4.80661193361078	4.9467620042342	3.62828531712393e-06	2.08335353942414e-05	3.69269682293952
LBP	-1.30061597833775	9.66894180063417	-4.94040331570443	3.72191945004553e-06	2.13372310965941e-05	3.66804926155067
REEP6	-1.23431310461796	9.01082211646188	-4.9261597651817	3.94029115800321e-06	2.24683280164654e-05	3.61290284879243
PNMA1	1.02885935531793	6.68403124864579	4.92202843129058	4.00593301911045e-06	2.2772503980782e-05	3.59692438603401
NR1I3	-1.19363669125773	5.95669322678029	-4.89012253197201	4.55006051902124e-06	2.55305676129481e-05	3.47377897075421
ORM1	-1.03761244554966	13.3421086183115	-4.88498501866915	4.64415779866025e-06	2.60180980114852e-05	3.45399235567017
GPR158	1.09829284333554	3.8276300096446	4.87275992221422	4.87575671540998e-06	2.72310446630829e-05	3.40695613099134
SERPINC1	-1.754337088841	11.1413006751222	-4.8700841842575	4.92792806429436e-06	2.74940547220216e-05	3.39667013572954
UGT2B15	-1.79437053339596	9.47431795534417	-4.86846211773139	4.95981929752315e-06	2.7643492213454e-05	3.3904362005385
RARRES3	-1.02245379872163	7.33959571317215	-4.86705031126613	4.98774018546564e-06	2.7777659011288e-05	3.38501130108736
SLC6A8	1.2523953910809	5.46126062808825	4.86367128298611	5.05518936447907e-06	2.81171372486682e-05	3.37203094824425
CYP4F3	-1.29712233925545	9.58446475564804	-4.84450478994623	5.45491556283447e-06	3.0162228468349e-05	3.29850140063374
MAGEA1	1.43752879486259	4.21732055687673	4.81348999900813	6.16778891983378e-06	3.35977694292229e-05	3.1798707433281
DUSP5	-1.37961763310492	6.3065864729819	-4.81013080696802	6.2502359823704e-06	3.39517023001295e-05	3.16704829348847
CPS1	-2.53186542429266	10.6987902778438	-4.80298762869633	6.42913693247089e-06	3.48199354674317e-05	3.13979910647016
HGD	-1.03972069615753	8.36048142581583	-4.79534438606073	6.6260793943241e-06	3.58149019284323e-05	3.11066828608866
LOC100507389	-1.76756253547745	7.07498289760867	-4.78821072133541	6.81517964823781e-06	3.67452900705412e-05	3.08350390919902
COL4A2	1.04407162547893	7.3145366880037	4.77661977504228	7.13368355266264e-06	3.83670268171396e-05	3.03941672558819
ANO1	-1.03891052547524	5.81354252794292	-4.7607643574798	7.59291347895973e-06	4.06007374012748e-05	2.97921015378593
HRG	-1.82726756268421	11.6227086126305	-4.75376474152585	7.80467818315173e-06	4.16243095319666e-05	2.95266827661505
SDS	-1.59350481679192	7.29913766547761	-4.71764121400717	8.99215473543694e-06	4.73509548848288e-05	2.81605616547538
TGFBR3	-1.03265933080975	7.02705670696261	-4.70660649565829	9.38867507667129e-06	4.92354035929192e-05	2.77444761755078
HMOX1	-1.21036085941645	7.56634594847404	-4.69239880303978	9.92429896307518e-06	5.17435216584317e-05	2.72095980302457
SCGN	1.19522723367963	5.70470798672216	4.68557917739233	1.01918269149029e-05	5.29979894784806e-05	2.69532002631905
AGXT	-1.30234856401046	9.22185103659664	-4.67152610830859	1.07653867408044e-05	5.56198804816602e-05	2.64255470032703
KCNJ8	-1.05889957456528	7.12242898361739	-4.64942926174183	1.17311652875411e-05	6.0079215224959e-05	2.55977891249204
ST8SIA6-AS1	1.27823765520925	4.2592100688334	4.64108519725978	1.21173092389165e-05	6.17594449159214e-05	2.5285829009472
CPLX1	1.04786269833113	4.4167834482098	4.62600657732455	1.28466321957808e-05	6.49318690325025e-05	2.47229391082436
AKR1B10	2.74392612302903	8.46630478081649	4.60458053640361	1.39566773242414e-05	6.9938424925202e-05	2.39250013932134
NR4A2	-1.02980284666961	5.99450629620822	-4.60087601250497	1.4157810536449e-05	7.08807101839838e-05	2.37872669239583
CXCL9	-1.41241295822281	6.66089110483551	-4.59819096176679	1.43053470403586e-05	7.1454135978059e-05	2.36874785925558
LOC101927331	-1.13164617538867	4.76349927606025	-4.58943647425035	1.47968135878265e-05	7.35799991213209e-05	2.33623690679358
ETNK2	-1.15688036681218	6.81237214347998	-4.58416423662243	1.51006494470172e-05	7.48910587439908e-05	2.31667593827174
SERPINA3	-1.34509367222958	12.2331316179152	-4.57656437242345	1.55492943693231e-05	7.69222917475331e-05	2.28850315982303
HABP2	-1.19429393018715	9.82529637818734	-4.55923858378949	1.66209371878192e-05	8.16825131474918e-05	2.22438304942715
S100P	2.191328446397	5.2826855110979	4.54825435920144	1.73370575384017e-05	8.46638039871477e-05	2.18380927402958
SGK1	-1.03804811114795	8.98230181371383	-4.54227782672897	1.7739168474241e-05	8.63548145172526e-05	2.16175826888937
EFHD1	-1.09764712597628	6.52130286035143	-4.53125396805936	1.85047078935902e-05	8.9663329379215e-05	2.12113146441511
EEF1A2	1.23170410770336	4.58801557312723	4.52614290427753	1.88704087660155e-05	9.11648730500966e-05	2.10231603677946
BHMT2	-1.07962685961907	8.64443414612234	-4.52443493129086	1.89941691155025e-05	9.172184296565e-05	2.09603137376554
G0S2	-1.63475099513705	8.24605635222619	-4.5203206358061	1.92955294082985e-05	9.30318633439964e-05	2.0808984127833
SLC2A2	-1.48276051067455	10.234788536993	-4.51870774991668	1.94149279613239e-05	9.35242347378302e-05	2.07496831119866
FGL1	-1.33497611565171	11.6841954616858	-4.51693282647519	1.9547148913456e-05	9.40356399518023e-05	2.06844395774199
NR2F1	-1.17555934455128	6.46749500383142	-4.51547093731723	1.96567053526592e-05	9.4520684210777e-05	2.06307146197597
SORD	-1.02255546624484	8.33555745098428	-4.50615891839822	2.03686524221215e-05	9.75757590478311e-05	2.0288747262885
HMGCS2	-1.36649732039309	9.1741210958515	-4.50436489040898	2.05086542222278e-05	9.80945195215148e-05	2.0222915025097
FREM2	-1.35757676149425	3.72749990553574	-4.49444535224639	2.12997325663582e-05	0.00010147483152021	1.9859209159148
GAL3ST1	1.02224922348401	5.50073421171885	4.46074063911384	2.42145277646832e-05	0.000113983624319999	1.86271391214393
MAP7D2	1.21165809538941	3.66696382804862	4.41605436872093	2.86794600065351e-05	0.000132549914092104	1.70026150623467
SULT2A1	-1.81866931008693	10.0184643626635	-4.40789578562872	2.95763904372724e-05	0.000136317067292094	1.6707132285138
HLA-DRA	-1.31141211941866	8.71279225108997	-4.40389856224587	3.00256721666543e-05	0.000138181908485561	1.65624894821531
MLLT11	1.08976319434313	6.60751886319197	4.39923731504709	3.05579233150009e-05	0.000140400085832052	1.63939235068328
SGCE	1.32190740454613	6.34873494365174	4.39433142897823	3.11279555961224e-05	0.000142708791556815	1.62166329467194
CFHR2	-1.15479799213454	11.8197490747787	-4.35318096935942	3.63314172516591e-05	0.000164234692640955	1.4734489517167
MEP1A	1.28744701682693	3.84746395977011	4.34232390029111	3.7838628750059e-05	0.000170124549070811	1.4344931017636
KNG1	-1.07339370719127	9.97277085533096	-4.33745364516039	3.8534182499884e-05	0.000172891279656045	1.41703861350798
MUC13	1.23371316434571	5.32158697661514	4.31748657636465	4.15170524366479e-05	0.000184674583758017	1.34561057515581
ABCB11	-1.14891046253315	5.15447117525433	-4.31106869343912	4.25222712101989e-05	0.000188550509150954	1.32269709467687
CFHR5	-1.8810851702402	8.51209064671687	-4.30620860932376	4.32990797358248e-05	0.000191533191730299	1.30536001645397
PLA2G2A	-2.06991028591954	7.84266634033558	-4.26168349906647	5.10826654965624e-05	0.000222107019276519	1.14711975602297
NQO1	1.47389530826334	5.30942655410226	4.24251410874307	5.48343486864176e-05	0.00023653621949435	1.07932317545595
ISX	1.16817698917809	4.04588363476021	4.23970262550648	5.54064420772705e-05	0.000238701888240975	1.06939661271673
SYBU	-1.10586779661251	7.8455167631127	-4.23240986079097	5.69173396943523e-05	0.000244578518833461	1.04366803044873
PRAP1	-1.16381817276378	9.08261850680407	-4.21356901104957	6.1006727500496e-05	0.000259881697928042	0.977333177992397
DKK1	2.06534325012894	4.41632727269124	4.20542514313027	6.28606348475988e-05	0.000267096021655231	0.948720663543419
CCND1	-1.21360182810197	7.5652055943982	-4.19540033554871	6.52172848200882e-05	0.000275702824718737	0.913549935204475
ABRACL	-1.04216759441313	6.26685620048884	-4.15588257651186	7.53627760983513e-05	0.000314297032137442	0.775450072692323
SELE	-1.00804246797635	3.7534051265689	-4.13720228817701	8.06715182225827e-05	0.000334056298350274	0.710472898224296
HS6ST2	1.03660976584144	3.08361536550403	4.0878771936327	9.647361260217e-05	0.000393175820379218	0.539847207589633
FCAMR	-1.14109849795535	4.83029480631523	-4.02088742518669	0.000122755644991665	0.000486372915096894	0.310340376610453
RELN	-1.66110189577807	7.78281090203461	-3.995103522132	0.000134598792796653	0.000527887639997451	0.222696627713356
DIO1	-1.73462269440761	9.26427433571146	-3.92736608219902	0.000171156232777152	0.000656983851856705	-0.00569518940829106
PRAME	1.02562318285809	3.94648513330691	3.91727857137133	0.000177354110091929	0.000678489142371119	-0.0394749636523191
APOA1	-1.51582345507294	12.7807584135289	-3.89228826727056	0.000193646464523898	0.000733687995859311	-0.12289732915747
MLIP	-1.27176468143973	6.36265311533888	-3.8349201776233	0.000236629632342064	0.000876752469045637	-0.312979319693895
CFH	-1.18083910996905	10.8246698974765	-3.82026524579529	0.000248990478710582	0.000918934862028334	-0.361215895435829
CLDN2	-1.01775721465149	5.30144571092615	-3.79920715158285	0.000267835334013236	0.000980297242628227	-0.430298075120459
OAT	-1.50318762837091	9.02674957933677	-3.78329516954023	0.000282968932852907	0.00103028859980898	-0.482317184422101
INSIG1	-1.04784651827291	9.46462269401506	-3.78271777214904	0.000283533124706069	0.00103182231080009	-0.484201861047177
BAAT	-1.08377899851716	9.8633906436121	-3.75877174410132	0.000307898727795365	0.00110691202937955	-0.562181967210592
AFP	1.61887978513668	5.92648023748183	3.74854865139727	0.000318897298156254	0.00114152474739252	-0.595364910491054
ZNF385B	-1.00586324481469	5.29249518529528	-3.71518714341222	0.000357450181546906	0.00126241539406869	-0.703198176371607
C15orf48	1.4820771676982	4.88383109532303	3.68197937143298	0.000400201778777355	0.00139519708837	-0.809839507968283
FOXQ1	1.49906333368332	5.69454594021667	3.58736125825707	0.000550254115788874	0.00185702187798885	-1.10983642554466
AHSG	-1.26569018711317	12.2988724157749	-3.54983598249072	0.000623417625354769	0.00207811265594885	-1.22721289417772
HOXC6	1.07742469024462	4.149755539239	3.47952072543979	0.000785950630561554	0.00254420526290168	-1.44466508559934
ACSM2A	-1.21011744374448	8.42277483445634	-3.46853194112835	0.000814711224942398	0.00262748617123589	-1.47835221469721
IFIT1	-1.02439645477822	7.38203434443123	-3.44023178661273	0.000893420605581781	0.00284656215018574	-1.56473734482122
PCOLCE2	1.08078323124816	6.53599741980447	3.43517542358019	0.000908217726879914	0.00288945613284319	-1.58011513558142
COX7B2	1.17884388275494	3.87662812894702	3.35429880221371	0.00117863930009958	0.00361461252445295	-1.8237318498131
MMP12	1.21074839891873	3.63526921449333	3.3366894085988	0.00124679633449787	0.00379863247936998	-1.87618349975057
PDZK1IP1	1.29708633952255	5.30322699339411	3.32920715954441	0.00127686256589001	0.00388313274427195	-1.89840572293988
CCL20	1.50270372283009	6.94818766184436	3.27419473051323	0.00151973672508169	0.00451831104053191	-2.06060332434084
MYH4	1.01812570404141	3.29942155053508	3.24023287953146	0.00169061710552022	0.00495528345112947	-2.15968334776225
G6PC	-1.03567421942234	7.88086329951116	-3.23816774637695	0.0017015671505803	0.00498228985956933	-2.16568206285946
XPNPEP2	-1.17781847837459	6.28573818906064	-3.23060326208295	0.00174224585945693	0.00508215675533084	-2.18762944766446
GPR88	1.67961257298114	5.5885907838552	3.16464503845747	0.00213750783093072	0.00608352485057082	-2.3772836419842
LGALS4	1.1729882163001	8.63623610813846	3.15909264260055	0.00217434250345795	0.00616566765680656	-2.39310759208344
CHI3L1	-1.22092147026967	7.00195977355001	-3.07760116749239	0.0027876885297284	0.00766986273624004	-2.62280202542535
MAGEA12	1.27494464478338	3.63285813145726	3.07634539321069	0.00279828958281694	0.00769707372163811	-2.62630399171966
GTSF1	1.01116297384321	4.17369299161052	2.93209204253813	0.00429798625779452	0.0112193244653435	-3.02086713443609
MAGEA6	1.49640943570403	4.09770046261065	2.89520864689442	0.0047858363830659	0.01234104027659	-3.11926495665305
NPTX2	1.10131707132331	3.99403944120756	2.83552139213219	0.00568433999076482	0.0143203041093695	-3.27631988060621
LCN2	1.02670658687003	6.47438459994715	2.72179465384781	0.00783699338363796	0.0188256509580555	-3.56801099086889
DHRS2	-1.10156737789198	6.82679072902629	-2.4807246179141	0.0150287979141897	0.0330844409552614	-4.15268860017939
